# Supplementary material
Source: MDPI journal article supplement (https://www.mdpi.com/2304-6740/3/2/279)
Supplement: s1 [file s1]

#1. submission details 

_publ_contact_author           # Name and address of author for correspondence
;
      Dr A. Dolbecq
      Institut Lavoisier, ILV, UMR CNRS 8180
      Universit\'e de Versailles Saint-Quentin-en-Yvelines
      45 Avenue des Etats Unis
      78035 Versailles cedex
      France
;
_publ_contact_author_phone        '(33) 1 39 25 43 83' 
_publ_contact_author_fax          '(33) 1 39 25 43 81' 
_publ_contact_author_email        anne.dolbecq@uvsq.fr

_publ_requested_journal           'Inorganics'

_publ_requested_coeditor_name     ?

_publ_contact_letter
;
;

#====================================================================

# 2. processing summary (iucr office use only) 

_journal_date_recd_electronic     ?

_journal_date_to_coeditor         ?
_journal_date_from_coeditor       ?
_journal_date_accepted            ?

_journal_date_printers_first      ?
_journal_date_printers_final      ?
_journal_date_proofs_out          ?
_journal_date_proofs_in           ?

_journal_coeditor_name            ?
_journal_coeditor_code            ?
_journal_coeditor_notes
; 
;

_journal_techeditor_code          ?
_journal_techeditor_notes
; 
;

_journal_coden_ASTM               ?
_journal_name_full                ?
_journal_year                     ?
_journal_volume                   ?
_journal_issue                    ?
_journal_page_first               ?
_journal_page_last                ?

_journal_suppl_publ_number        ?
_journal_suppl_publ_pages         ?

#====================================================================

# 3. title and author list 

_publ_section_title
;
Fully Oxidized and Mixed-Valent Polyoxomolybdates Structured by Bisphosphonates with Pendant Pyridine Groups:
Synthesis, Structure and Photochromic Properties
;

# The loop structure below should contain the names and addresses of all
# authors, in the required order of publication. Repeat as necessary.

loop_
        _publ_author_name
        _publ_author_address

      'Oms, Olivier'
;     Institut Lavoisier, ILV, UMR CNRS 8180
      Universit\'e de Versailles Saint-Quentin-en-Yvelines
      45 Avenue des Etats Unis
      78035 Versailles cedex
      France
;
      'Benali, Tarik'
;     Institut Lavoisier, ILV, UMR CNRS 8180
      Universit\'e de Versailles Saint-Quentin-en-Yvelines
      45 Avenue des Etats Unis
      78035 Versailles cedex
      France
;
      'Marrot, J\'erome' 
;     Institut Lavoisier, IREM, UMR CNRS 8180
      Universit\'e de Versailles Saint-Quentin-en-Yvelines
      45 Avenue des Etats Unis
      78035 Versailles cedex
      France
;
      'Mialane, Pierre'
;     Institut Lavoisier, ILV, UMR CNRS 8180
      Universit\'e de Versailles Saint-Quentin-en-Yvelines
      45 Avenue des Etats Unis
      78035 Versailles cedex
      France
;
      'Puget, Marin'
;     Institut des Materiaux Jean Rouxel
      Universit\'e de Nantes
      2 Rue de la Houssiniere, BP 32229
      44322 Nantes cedex
      France
;
      'Serier-Brault, Helene'
;     Institut des Materiaux Jean Rouxel
      Universit\'e de Nantes
      2 Rue de la Houssiniere, BP 32229
      44322 Nantes cedex
      France
;
      'Deniard, Philippe'
;     Institut des Materiaux Jean Rouxel
      Universit\'e de Nantes
      2 Rue de la Houssiniere, BP 32229
      44322 Nantes cedex
      France
;
      'Dessapt, Remi'
;     Institut des Materiaux Jean Rouxel
      Universit\'e de Nantes
      2 Rue de la Houssiniere, BP 32229
      44322 Nantes cedex
      France
;
     'Dolbecq, Anne' 
;     Institut Lavoisier, ILV, UMR CNRS 8180
      Universit\'e de Versailles Saint-Quentin-en-Yvelines
      45 Avenue des Etats Unis
      78035 Versailles cedex
      France
;
#====================================================================

# 4. text 

_publ_section_abstract
;

;
_publ_section_comment
;

;
_publ_section_experimental
;

;
_publ_section_references
;
Sheldrick, G.M. (1993).  SHELXL-93. Program for crystal structure
determination.  Univ. of G\"ottingen, Federal Republic of Germany.

Sheldrick, G.M. (1997).  SHELXS-86. Program for the solution of crystal
structures.  Univ. of G\"ottingen, Federal Republic of Germany.
;
_publ_section_figure_captions
;

;
_publ_section_acknowledgements
;

;

#====================================================================   
data_NaMo6(Ale-4Py)2
  
  
_audit_creation_method            'SHELXL-2014/7' 
_shelx_SHELXL_version_number      '2014/7' 
_chemical_name_systematic         ? 
_chemical_name_common             ? 
_chemical_melting_point           ? 
_chemical_formula_moiety          ? 
_chemical_formula_sum 
 'C20 H30 Mo6 N4 Na4 O48 P4' 
_chemical_formula_weight          1885.96 
  
loop_ 
 _atom_type_symbol 
 _atom_type_description 
 _atom_type_scat_dispersion_real 
 _atom_type_scat_dispersion_imag 
 _atom_type_scat_source 
 'C'  'C'   0.0033   0.0016 
 'International Tables Vol C Tables 4.2.6.8 and 6.1.1.4' 
 'H'  'H'   0.0000   0.0000 
 'International Tables Vol C Tables 4.2.6.8 and 6.1.1.4' 
 'N'  'N'   0.0061   0.0033 
 'International Tables Vol C Tables 4.2.6.8 and 6.1.1.4' 
 'O'  'O'   0.0106   0.0060 
 'International Tables Vol C Tables 4.2.6.8 and 6.1.1.4' 
 'P'  'P'   0.1023   0.0942 
 'International Tables Vol C Tables 4.2.6.8 and 6.1.1.4' 
 'Mo'  'Mo'  -1.6832   0.6857 
 'International Tables Vol C Tables 4.2.6.8 and 6.1.1.4' 
 'Na'  'Na'   0.0362   0.0249 
 'International Tables Vol C Tables 4.2.6.8 and 6.1.1.4' 
  
_space_group_crystal_system       triclinic 
_space_group_IT_number            2 
_space_group_name_H-M_alt         'P -1' 
_space_group_name_Hall            '-P 1' 
  
_shelx_space_group_comment 
; 
The symmetry employed for this shelxl refinement is uniquely defined 
by the following loop, which should always be used as a source of 
symmetry information in preference to the above space-group names. 
They are only intended as comments. 
; 
  
loop_ 
 _space_group_symop_operation_xyz 
 'x, y, z' 
 '-x, -y, -z' 
  
_cell_length_a                    9.0240(3) 
_cell_length_b                    19.4282(6) 
_cell_length_c                    21.1568(7) 
_cell_angle_alpha                 103.992(2) 
_cell_angle_beta                  95.5616(16) 
_cell_angle_gamma                 103.4068(14) 
_cell_volume                      3454.8(2) 
_cell_formula_units_Z             2 
_cell_measurement_temperature     200(2) 
_cell_measurement_reflns_used     9891 
_cell_measurement_theta_min       2.32 
_cell_measurement_theta_max       29.94 
  
_exptl_crystal_description        parallelepiped 
_exptl_crystal_colour             colorless
_exptl_crystal_density_meas       ? 
_exptl_crystal_density_method     ? 
_exptl_crystal_density_diffrn     1.813 
_exptl_crystal_F_000              1836 
_exptl_transmission_factor_min    ? 
_exptl_transmission_factor_max    ? 
_exptl_crystal_size_max           0.350 
_exptl_crystal_size_mid           0.200 
_exptl_crystal_size_min           0.080 
_exptl_absorpt_coefficient_mu     1.273 
_shelx_estimated_absorpt_T_min    0.664 
_shelx_estimated_absorpt_T_max    0.905 
_exptl_absorpt_correction_type    multi-scan
_exptl_absorpt_correction_T_min   0.6450  
_exptl_absorpt_correction_T_max   0.7460 
_exptl_absorpt_process_details    'SADABS (Sheldrick, V2.10)'   
_exptl_absorpt_special_details    'Blessing, Acta Cryst. (1995) A51, 33-38'   
_diffrn_ambient_temperature       200(2) 
_diffrn_radiation_wavelength      0.71073 
_diffrn_radiation_type            MoK\a 
_diffrn_source                    'fine-focus sealed tube'  
_diffrn_measurement_device_type   'Bruker APEX-II CCD' 
_diffrn_measurement_method        '\f and \w scans' 
_diffrn_detector_area_resol_mean  ? 
_diffrn_reflns_number             70048 
_diffrn_reflns_av_unetI/netI      0.0217 
_diffrn_reflns_av_R_equivalents   0.0301 
_diffrn_reflns_limit_h_min        -10 
_diffrn_reflns_limit_h_max        10 
_diffrn_reflns_limit_k_min        -23 
_diffrn_reflns_limit_k_max        23 
_diffrn_reflns_limit_l_min        -25 
_diffrn_reflns_limit_l_max        25 
_diffrn_reflns_theta_min          1.005 
_diffrn_reflns_theta_max          25.025 
_diffrn_reflns_theta_full         25.025 
_diffrn_measured_fraction_theta_max   0.999 
_diffrn_measured_fraction_theta_full  0.999 
_diffrn_reflns_Laue_measured_fraction_max    0.999 
_diffrn_reflns_Laue_measured_fraction_full   0.999 
_diffrn_reflns_point_group_measured_fraction_max   0.999 
_diffrn_reflns_point_group_measured_fraction_full  0.999 
_reflns_number_total              12208 
_reflns_number_gt                 10696 
_reflns_threshold_expression      'I > 2\s(I)' 
_reflns_Friedel_coverage          0.000 
_reflns_Friedel_fraction_max      . 
_reflns_Friedel_fraction_full     . 
  
_reflns_special_details 
; 
 Reflections were merged by SHELXL according to the crystal 
 class for the calculation of statistics and refinement. 
  
 _reflns_Friedel_fraction is defined as the number of unique 
 Friedel pairs measured divided by the number that would be 
 possible theoretically, ignoring centric projections and 
 systematic absences. 
; 
  
_computing_data_collection        'Bruker APEX2' 
_computing_cell_refinement        'Bruker SAINT' 
_computing_data_reduction         'Bruker SAINT' 
_computing_structure_solution     'SHELXS-97 (Sheldrick 2008)' 
_computing_structure_refinement 'SHELXL-2014/7 (Sheldrick, 2014)' 
_computing_molecular_graphics     'Bruker SHELXTL' 
_computing_publication_material   'Bruker SHELXTL' 
_refine_special_details           ? 
_refine_ls_structure_factor_coef  Fsqd 
_refine_ls_matrix_type            full 
_refine_ls_weighting_scheme       calc 
_refine_ls_weighting_details 
'w=1/[\s^2^(Fo^2^)+(0.1110P)^2^+57.9125P] where P=(Fo^2^+2Fc^2^)/3' 
_atom_sites_solution_primary      ? 
_atom_sites_solution_secondary    ? 
_atom_sites_solution_hydrogens    geom 
_refine_ls_hydrogen_treatment     constr 
_refine_ls_extinction_method      none 
_refine_ls_extinction_coef        . 
_refine_ls_number_reflns          12208 
_refine_ls_number_parameters      865 
_refine_ls_number_restraints      0 
_refine_ls_R_factor_all           0.0809 
_refine_ls_R_factor_gt            0.0710 
_refine_ls_wR_factor_ref          0.2096 
_refine_ls_wR_factor_gt           0.1960 
_refine_ls_goodness_of_fit_ref    1.023 
_refine_ls_restrained_S_all       1.023 
_refine_ls_shift/su_max           0.001 
_refine_ls_shift/su_mean          0.000 
  
loop_ 
 _atom_site_label 
 _atom_site_type_symbol 
 _atom_site_fract_x 
 _atom_site_fract_y 
 _atom_site_fract_z 
 _atom_site_U_iso_or_equiv 
 _atom_site_adp_type 
 _atom_site_occupancy 
 _atom_site_site_symmetry_order 
 _atom_site_calc_flag 
 _atom_site_refinement_flags_posn 
 _atom_site_refinement_flags_adp 
 _atom_site_refinement_flags_occupancy 
 _atom_site_disorder_assembly 
 _atom_site_disorder_group 
Mo1 Mo -0.28879(10) 0.73436(5) 0.05667(4) 0.0418(2) Uani 1 1 d . . . . . 
Mo2 Mo 0.07343(9) 0.75018(4) 0.08610(4) 0.0343(2) Uani 1 1 d . . . . . 
Mo3 Mo 0.18174(8) 0.77587(4) 0.26903(3) 0.02298(18) Uani 1 1 d . . . . . 
Mo4 Mo 0.19824(7) 0.83307(3) 0.44452(3) 0.01742(17) Uani 1 1 d . . . . . 
Mo5 Mo 0.27735(9) 0.81480(5) 0.61636(4) 0.0365(2) Uani 1 1 d . . . . . 
Mo6 Mo 0.14789(9) 0.64440(5) 0.61026(5) 0.0398(2) Uani 1 1 d . . . . . 
P1 P -0.1175(2) 0.83975(12) 0.20503(11) 0.0279(5) Uani 1 1 d . . . . . 
P2 P -0.1816(3) 0.67648(12) 0.18215(11) 0.0313(5) Uani 1 1 d . . . . . 
P3 P 0.2595(3) 0.67468(14) 0.47130(17) 0.0442(7) Uani 1 1 d . . . . . 
P4 P -0.0435(2) 0.70025(10) 0.50033(10) 0.0197(4) Uani 1 1 d . . . . . 
O1 O -0.4147(9) 0.6529(5) 0.0117(4) 0.065(3) Uani 1 1 d . . . . . 
O2 O -0.3558(9) 0.7996(5) 0.0297(4) 0.058(2) Uani 1 1 d . . . . . 
O3 O -0.1112(8) 0.7357(4) 0.0175(3) 0.0429(17) Uani 1 1 d . . . . . 
O4 O -0.3687(7) 0.7437(4) 0.1400(3) 0.0385(16) Uani 1 1 d . . . . . 
O5 O -0.1390(7) 0.6774(3) 0.1125(3) 0.0348(15) Uani 1 1 d . . . . . 
O6 O -0.0842(7) 0.8220(3) 0.1329(3) 0.0321(14) Uani 1 1 d . . . . . 
O7 O 0.1321(9) 0.6777(4) 0.0428(3) 0.0497(19) Uani 1 1 d . . . . . 
O8 O 0.1840(9) 0.8245(4) 0.0668(4) 0.0488(19) Uani 1 1 d . . . . . 
O9 O 0.1630(7) 0.7626(3) 0.1705(3) 0.0313(13) Uani 1 1 d . . . . . 
O10 O 0.2680(7) 0.7071(3) 0.2696(3) 0.0346(14) Uani 1 1 d . . . . . 
O11 O 0.3353(7) 0.8520(3) 0.2859(3) 0.0298(13) Uani 1 1 d . . . . . 
O12 O 0.1192(6) 0.7900(3) 0.3528(3) 0.0252(12) Uani 1 1 d . . . . . 
O13 O -0.0372(7) 0.6905(3) 0.2331(3) 0.0307(14) Uani 1 1 d . . . . . 
O14 O 0.0251(6) 0.8476(3) 0.2541(3) 0.0249(12) Uani 1 1 d . . . . . 
O15 O 0.3753(6) 0.8815(3) 0.4373(3) 0.0295(13) Uani 1 1 d . . . . . 
O16 O 0.0977(6) 0.8986(3) 0.4588(3) 0.0239(12) Uani 1 1 d . . . . . 
O17 O 0.2577(7) 0.8434(3) 0.5412(3) 0.0291(13) Uani 1 1 d . . . . . 
O18 O 0.2739(7) 0.7354(3) 0.4371(4) 0.0370(16) Uani 1 1 d . . . . . 
O19 O -0.0164(6) 0.7580(3) 0.4622(3) 0.0188(11) Uani 1 1 d . . . . . 
O20 O 0.4705(9) 0.8487(6) 0.6461(5) 0.076(3) Uani 1 1 d . . . . . 
O21 O 0.1935(9) 0.8721(4) 0.6676(3) 0.0448(17) Uani 1 1 d . . . . . 
O22 O 0.2487(8) 0.7371(4) 0.6659(4) 0.0470(19) Uani 1 1 d . . . . . 
O23 O 0.0408(6) 0.7315(3) 0.5735(3) 0.0273(12) Uani 1 1 d . . . . . 
O24 O 0.3114(7) 0.7055(4) 0.5463(5) 0.055(2) Uani 1 1 d . . . . . 
O25 O -0.0017(8) 0.6176(4) 0.6510(4) 0.0432(17) Uani 1 1 d . . . . . 
O26 O 0.2733(9) 0.5933(5) 0.6250(5) 0.065(3) Uani 1 1 d . . . . . 
O27 O 0.0570(8) 0.5926(3) 0.5209(4) 0.0417(17) Uani 1 1 d . . . . . 
O28 O -0.1844(7) 0.9044(4) 0.2224(3) 0.0382(15) Uani 1 1 d . . . . . 
O29 O -0.2987(8) 0.6069(4) 0.1800(3) 0.0442(18) Uani 1 1 d . . . . . 
O30 O 0.3367(10) 0.6162(5) 0.4411(6) 0.076(3) Uani 1 1 d . . . . . 
O31 O -0.2112(6) 0.6644(3) 0.4961(3) 0.0286(13) Uani 1 1 d . . . . . 
C1 C -0.2649(10) 0.7550(5) 0.2005(4) 0.032(2) Uani 1 1 d . . . . . 
C2 C -0.3582(10) 0.7577(5) 0.2575(4) 0.033(2) Uani 1 1 d . . . . . 
H2A H -0.4247 0.7913 0.2552 0.040 Uiso 1 1 calc R U . . . 
H2B H -0.4265 0.7080 0.2520 0.040 Uiso 1 1 calc R U . . . 
C3 C -0.2581(9) 0.7834(5) 0.3254(4) 0.0289(18) Uani 1 1 d . . . . . 
H3A H -0.1859 0.7522 0.3270 0.035 Uiso 1 1 calc R U . . . 
H3B H -0.1961 0.8347 0.3329 0.035 Uiso 1 1 calc R U . . . 
C4 C -0.3552(9) 0.7793(5) 0.3796(4) 0.0240(17) Uani 1 1 d . . . . . 
H4A H -0.4458 0.7983 0.3711 0.029 Uiso 1 1 calc R U . . . 
H4B H -0.3928 0.7276 0.3807 0.029 Uiso 1 1 calc R U . . . 
N5 N -0.2587(7) 0.8245(3) 0.4443(3) 0.0190(13) Uani 1 1 d . . . . . 
H5A H -0.1724 0.8085 0.4499 0.023 Uiso 1 1 calc R U . . . 
H5B H -0.2280 0.8721 0.4430 0.023 Uiso 1 1 calc R U . . . 
C6 C -0.3392(9) 0.8217(4) 0.5023(4) 0.0222(16) Uani 1 1 d . . . . . 
H6A H -0.3329 0.7772 0.5164 0.027 Uiso 1 1 calc R U . . . 
H6B H -0.4495 0.8190 0.4902 0.027 Uiso 1 1 calc R U . . . 
C7 C -0.2641(9) 0.8896(4) 0.5581(4) 0.0190(15) Uani 1 1 d . . . . . 
C8 C -0.1157(10) 0.9018(5) 0.5910(4) 0.0315(19) Uani 1 1 d . . . . . 
H8 H -0.0598 0.8659 0.5795 0.038 Uiso 1 1 calc R U . . . 
C9 C -0.0497(11) 0.9654(5) 0.6400(4) 0.037(2) Uani 1 1 d . . . . . 
H9 H 0.0522 0.9743 0.6624 0.045 Uiso 1 1 calc R U . . . 
N10 N -0.1315(10) 1.0152(4) 0.6559(4) 0.0347(18) Uani 1 1 d . . . . . 
H10 H -0.0886 1.0560 0.6875 0.042 Uiso 1 1 calc R U . . . 
C11 C -0.2728(12) 1.0054(5) 0.6262(5) 0.037(2) Uani 1 1 d . . . . . 
H11 H -0.3259 1.0421 0.6393 0.044 Uiso 1 1 calc R U . . . 
C12 C -0.3454(10) 0.9420(5) 0.5760(4) 0.0274(17) Uani 1 1 d . . . . . 
H12 H -0.4475 0.9348 0.5545 0.033 Uiso 1 1 calc R U . . . 
C13 C 0.0568(11) 0.6301(5) 0.4693(5) 0.036(2) Uani 1 1 d . . . . . 
C14 C -0.0197(14) 0.5734(5) 0.4061(5) 0.045(3) Uani 1 1 d . . . . . 
H14A H -0.1227 0.5472 0.4126 0.054 Uiso 1 1 calc R U . . . 
H14B H 0.0415 0.5370 0.3970 0.054 Uiso 1 1 calc R U . . . 
C15 C -0.0410(16) 0.6023(6) 0.3439(5) 0.053(3) Uani 1 1 d . . . . . 
H15A H -0.1224 0.6289 0.3476 0.064 Uiso 1 1 calc R U . . . 
H15B H 0.0564 0.6376 0.3424 0.064 Uiso 1 1 calc R U . . . 
C16 C -0.0854(17) 0.5400(6) 0.2797(6) 0.060(3) Uani 1 1 d . . . . . 
H16A H -0.0801 0.4931 0.2891 0.072 Uiso 1 1 calc R U . . . 
H16B H -0.1925 0.5346 0.2593 0.072 Uiso 1 1 calc R U . . . 
N17 N 0.0242(13) 0.5577(4) 0.2330(5) 0.055(3) Uani 1 1 d . . . . . 
H17A H 0.0229 0.6024 0.2270 0.066 Uiso 1 1 calc R U . . . 
H17B H 0.1216 0.5610 0.2518 0.066 Uiso 1 1 calc R U . . . 
C18 C -0.0137(17) 0.5024(6) 0.1680(6) 0.062(4) Uani 1 1 d . . . . . 
H18A H -0.1151 0.5027 0.1456 0.074 Uiso 1 1 calc R U . . . 
H18B H -0.0235 0.4531 0.1749 0.074 Uiso 1 1 calc R U . . . 
C19 C 0.1060(14) 0.5157(5) 0.1232(5) 0.044(3) Uani 1 1 d . . . . . 
C20 C 0.2285(13) 0.5774(6) 0.1358(5) 0.046(3) Uani 1 1 d . . . . . 
H20 H 0.2453 0.6152 0.1758 0.055 Uiso 1 1 calc R U . . . 
C21 C 0.3250(14) 0.5840(6) 0.0911(5) 0.050(3) Uani 1 1 d . . . . . 
H21 H 0.4103 0.6261 0.1002 0.060 Uiso 1 1 calc R U . . . 
N22 N 0.3009(10) 0.5319(5) 0.0348(4) 0.044(2) Uani 1 1 d . . . . . 
H22 H 0.3628 0.5378 0.0057 0.053 Uiso 1 1 calc R U . . . 
C23 C 0.1864(15) 0.4713(6) 0.0210(6) 0.053(3) Uani 1 1 d . . . . . 
H23 H 0.1738 0.4341 -0.0192 0.064 Uiso 1 1 calc R U . . . 
C24 C 0.0863(15) 0.4622(6) 0.0647(5) 0.054(3) Uani 1 1 d . . . . . 
H24 H 0.0031 0.4191 0.0546 0.064 Uiso 1 1 calc R U . . . 
Na1 Na 0.4898(5) 0.5455(2) 0.5879(3) 0.0576(12) Uani 1 1 d . . . . . 
Na2 Na 0.9603(14) 0.8558(6) 0.7604(6) 0.082(4) Uani 0.5 1 d . . P . . 
Na3 Na 1.3350(19) 0.9339(8) 0.8642(7) 0.095(4) Uani 0.5 1 d . . P . . 
Na4 Na 1.256(4) 0.721(2) 0.8583(9) 0.224(16) Uani 0.5 1 d . . P . . 
O1W O 0.6856(7) 0.5116(3) 0.5199(4) 0.0399(16) Uani 1 1 d . . . . . 
O2W O 0.5897(8) 0.6684(4) 0.5843(4) 0.0457(17) Uani 1 1 d . . . . . 
O3W O 0.4229(9) 0.4232(4) 0.6055(4) 0.0489(18) Uani 1 1 d . . . . . 
O4W O 0.4012(11) 0.5158(5) 0.9185(4) 0.072(3) Uani 1 1 d . . . . . 
O5W O 0.7811(16) 0.9671(4) 0.4354(5) 0.090(4) Uani 1 1 d . . . . . 
O6W O 0.6210(13) 0.9488(6) 0.2965(11) 0.147(8) Uani 1 1 d . . . . . 
O7W O 0.2683(12) 0.5430(6) 0.3006(6) 0.083(3) Uani 1 1 d . . . . . 
O8W O 0.5265(16) 0.5445(7) 0.2575(5) 0.111(5) Uani 1 1 d . . . . . 
O9W O 0.6884(13) 0.5905(7) 0.6861(6) 0.036(3) Uani 0.5 1 d . . P . . 
O10W O 0.5678(19) 0.5893(7) 0.8389(7) 0.049(4) Uani 0.5 1 d . . P . . 
O11W O 0.8439(15) 0.7599(8) 0.6751(7) 0.046(3) Uani 0.5 1 d . . P . . 
O12W O 0.7200(17) 0.8998(8) 0.7475(7) 0.046(3) Uani 0.5 1 d . . P . . 
O13W O 0.850(2) 0.6858(8) 0.8805(6) 0.066(6) Uani 0.5 1 d . . P . . 
O14W O 0.4834(18) 0.8665(13) 0.1530(7) 0.080(7) Uani 0.5 1 d . . P . . 
O15W O 0.278(2) 0.9509(9) 0.2012(9) 0.067(5) Uani 0.5 1 d . . P . . 
O16W O 1.625(3) 0.795(2) 0.8115(14) 0.109(13) Uani 0.5 1 d . . P . . 
O17W O 0.547(4) 0.0324(10) 0.2169(10) 0.125(12) Uani 0.5 1 d . . P . . 
O18W O 0.906(3) 0.0177(10) 0.1722(10) 0.092(8) Uani 0.5 1 d . . P . . 
O19W O 1.367(2) 0.6779(12) 0.8367(9) 0.068(5) Uani 0.5 1 d . . P . . 
O20W O 1.600(2) 0.8430(19) 0.8270(11) 0.085(9) Uani 0.5 1 d . . P . . 
O21W O -0.056(3) 0.8832(13) -0.0161(10) 0.089(7) Uani 0.5 1 d . . P . . 
O22W O 1.270(3) 0.6553(17) 0.9319(11) 0.109(9) Uani 0.5 1 d . . P . . 
O23W O 0.516(3) 0.9449(14) 0.0673(13) 0.099(7) Uani 0.5 1 d . . P . . 
O24W O 1.517(2) 0.7116(15) 0.7399(13) 0.111(10) Uani 0.5 1 d . . P . . 
O25W O 1.173(3) 0.8145(11) 0.7962(11) 0.031(6) Uani 0.25 1 d . . P . . 
O26W O 1.064(3) 0.6640(13) 0.7995(10) 0.106(9) Uani 0.5 1 d . . P . . 
O27W O 0.218(3) 0.9789(13) 0.1406(14) 0.040(7) Uani 0.25 1 d . . P . . 
  
loop_ 
 _atom_site_aniso_label 
 _atom_site_aniso_U_11 
 _atom_site_aniso_U_22 
 _atom_site_aniso_U_33 
 _atom_site_aniso_U_23 
 _atom_site_aniso_U_13 
 _atom_site_aniso_U_12 
Mo1 0.0342(5) 0.0535(5) 0.0190(4) -0.0025(4) 0.0040(3) -0.0119(4) 
Mo2 0.0360(4) 0.0327(4) 0.0249(4) 0.0000(3) 0.0157(3) -0.0051(3) 
Mo3 0.0215(4) 0.0168(3) 0.0253(4) -0.0017(3) 0.0105(3) -0.0003(3) 
Mo4 0.0139(3) 0.0138(3) 0.0255(4) 0.0066(3) 0.0035(2) 0.0040(2) 
Mo5 0.0223(4) 0.0432(5) 0.0424(5) 0.0306(4) -0.0098(3) -0.0081(3) 
Mo6 0.0245(4) 0.0429(5) 0.0705(6) 0.0437(5) 0.0151(4) 0.0120(3) 
P1 0.0229(10) 0.0278(11) 0.0224(11) -0.0028(9) 0.0029(8) -0.0033(9) 
P2 0.0320(12) 0.0255(11) 0.0205(11) -0.0072(8) 0.0126(9) -0.0127(9) 
P3 0.0337(13) 0.0379(14) 0.091(2) 0.0452(15) 0.0386(14) 0.0263(11) 
P4 0.0145(9) 0.0165(9) 0.0292(11) 0.0067(8) 0.0085(8) 0.0040(7) 
O1 0.051(5) 0.076(6) 0.030(4) -0.013(4) 0.010(3) -0.027(4) 
O2 0.049(5) 0.084(6) 0.039(4) 0.023(4) 0.002(3) 0.007(4) 
O3 0.042(4) 0.050(4) 0.022(3) 0.000(3) 0.011(3) -0.008(3) 
O4 0.027(3) 0.052(4) 0.021(3) -0.003(3) 0.003(2) -0.008(3) 
O5 0.038(3) 0.030(3) 0.019(3) -0.009(2) 0.014(3) -0.012(3) 
O6 0.029(3) 0.035(3) 0.023(3) 0.001(3) 0.007(2) -0.004(3) 
O7 0.051(4) 0.053(4) 0.029(4) -0.009(3) 0.015(3) 0.003(4) 
O8 0.048(4) 0.048(4) 0.042(4) 0.015(3) 0.017(3) -0.010(3) 
O9 0.028(3) 0.031(3) 0.029(3) 0.002(3) 0.012(2) -0.001(2) 
O10 0.037(3) 0.023(3) 0.041(4) 0.001(3) 0.017(3) 0.008(3) 
O11 0.025(3) 0.023(3) 0.034(3) -0.002(2) 0.009(2) -0.002(2) 
O12 0.021(3) 0.019(3) 0.031(3) 0.000(2) 0.010(2) 0.001(2) 
O13 0.036(3) 0.020(3) 0.027(3) -0.003(2) 0.016(3) -0.004(2) 
O14 0.024(3) 0.019(3) 0.023(3) -0.003(2) 0.003(2) -0.002(2) 
O15 0.020(3) 0.027(3) 0.044(4) 0.019(3) 0.001(2) 0.000(2) 
O16 0.029(3) 0.019(3) 0.026(3) 0.006(2) 0.004(2) 0.011(2) 
O17 0.024(3) 0.028(3) 0.036(3) 0.019(3) -0.003(2) 0.000(2) 
O18 0.026(3) 0.030(3) 0.074(5) 0.031(3) 0.028(3) 0.017(3) 
O19 0.014(2) 0.017(3) 0.026(3) 0.004(2) 0.005(2) 0.005(2) 
O20 0.029(4) 0.103(7) 0.095(7) 0.081(6) -0.026(4) -0.023(4) 
O21 0.055(4) 0.039(4) 0.032(4) 0.012(3) -0.004(3) -0.001(3) 
O22 0.029(3) 0.055(4) 0.059(5) 0.042(4) -0.010(3) -0.006(3) 
O23 0.020(3) 0.027(3) 0.035(3) 0.014(3) 0.003(2) 0.002(2) 
O24 0.017(3) 0.056(5) 0.124(8) 0.069(5) 0.025(4) 0.019(3) 
O25 0.032(3) 0.049(4) 0.060(5) 0.034(4) 0.015(3) 0.008(3) 
O26 0.041(4) 0.073(6) 0.118(8) 0.074(6) 0.029(5) 0.030(4) 
O27 0.042(4) 0.029(3) 0.072(5) 0.033(3) 0.028(4) 0.016(3) 
O28 0.033(3) 0.035(3) 0.043(4) 0.004(3) 0.005(3) 0.010(3) 
O29 0.051(4) 0.031(3) 0.028(3) -0.007(3) 0.015(3) -0.021(3) 
O30 0.068(6) 0.058(5) 0.159(10) 0.074(6) 0.080(6) 0.052(5) 
O31 0.019(3) 0.031(3) 0.030(3) 0.003(2) 0.009(2) -0.001(2) 
C1 0.021(4) 0.040(5) 0.017(4) -0.010(4) 0.002(3) -0.011(4) 
C2 0.019(4) 0.046(5) 0.020(4) -0.005(4) 0.004(3) -0.005(4) 
C3 0.019(4) 0.040(5) 0.021(4) -0.002(4) 0.006(3) 0.004(3) 
C4 0.017(4) 0.029(4) 0.017(4) -0.005(3) 0.000(3) 0.001(3) 
N5 0.017(3) 0.020(3) 0.017(3) 0.000(2) 0.001(2) 0.004(2) 
C6 0.022(4) 0.019(4) 0.022(4) 0.002(3) 0.004(3) 0.004(3) 
C7 0.021(4) 0.017(4) 0.017(4) 0.003(3) 0.006(3) 0.002(3) 
C8 0.024(4) 0.030(4) 0.034(5) -0.001(4) -0.002(4) 0.006(3) 
C9 0.032(5) 0.042(5) 0.026(5) 0.002(4) -0.003(4) -0.004(4) 
N10 0.051(5) 0.020(4) 0.020(4) -0.004(3) 0.005(3) -0.007(3) 
C11 0.056(6) 0.020(4) 0.032(5) 0.000(4) 0.017(4) 0.010(4) 
C12 0.032(4) 0.025(4) 0.024(4) 0.004(3) 0.007(3) 0.007(3) 
C13 0.037(5) 0.022(4) 0.070(7) 0.028(4) 0.037(5) 0.018(4) 
C14 0.068(7) 0.018(4) 0.061(7) 0.012(4) 0.044(6) 0.016(4) 
C15 0.091(9) 0.028(5) 0.042(6) 0.009(4) 0.030(6) 0.012(5) 
C16 0.091(9) 0.034(6) 0.050(7) 0.003(5) 0.038(7) 0.002(6) 
N17 0.090(8) 0.022(4) 0.048(5) 0.001(4) 0.034(5) 0.004(4) 
C18 0.091(10) 0.029(5) 0.051(7) -0.007(5) 0.038(7) -0.002(6) 
C19 0.069(7) 0.024(5) 0.038(5) 0.001(4) 0.020(5) 0.011(5) 
C20 0.059(7) 0.035(5) 0.037(5) -0.003(4) 0.019(5) 0.008(5) 
C21 0.055(7) 0.040(6) 0.044(6) -0.004(5) 0.017(5) 0.004(5) 
N22 0.047(5) 0.046(5) 0.034(4) 0.002(4) 0.013(4) 0.012(4) 
C23 0.067(8) 0.044(6) 0.040(6) -0.006(5) 0.017(5) 0.012(6) 
C24 0.071(8) 0.030(5) 0.044(6) -0.009(5) 0.022(6) -0.001(5) 
Na1 0.046(2) 0.041(2) 0.090(4) 0.021(2) 0.022(2) 0.0120(19) 
Na2 0.072(7) 0.065(7) 0.095(8) 0.042(6) -0.034(6) -0.007(5) 
Na3 0.121(11) 0.089(9) 0.074(8) 0.024(7) 0.001(7) 0.026(8) 
Na4 0.35(4) 0.34(4) 0.071(11) 0.080(17) 0.049(17) 0.23(4) 
O1W 0.034(4) 0.029(3) 0.062(5) 0.022(3) 0.007(3) 0.008(3) 
O2W 0.040(4) 0.047(4) 0.050(4) 0.013(3) 0.019(3) 0.006(3) 
O3W 0.050(4) 0.049(4) 0.040(4) 0.006(3) 0.014(3) 0.000(3) 
O4W 0.080(6) 0.056(5) 0.042(4) -0.025(4) 0.029(4) -0.022(4) 
O5W 0.175(12) 0.024(4) 0.063(6) 0.006(4) 0.052(7) 0.005(5) 
O6W 0.059(7) 0.069(7) 0.35(2) 0.084(11) 0.099(11) 0.031(6) 
O7W 0.073(7) 0.084(7) 0.106(8) 0.030(6) 0.022(6) 0.042(6) 
O8W 0.135(10) 0.100(8) 0.051(6) 0.013(6) 0.029(6) -0.056(8) 
O9W 0.018(6) 0.041(7) 0.042(7) 0.024(6) -0.006(5) -0.017(5) 
O10W 0.071(10) 0.029(7) 0.037(7) 0.016(6) 0.019(7) -0.016(7) 
O11W 0.030(7) 0.058(9) 0.036(7) 0.000(7) 0.008(6) -0.001(6) 
O12W 0.045(8) 0.048(8) 0.041(8) 0.021(7) -0.007(6) 0.003(7) 
O13W 0.117(14) 0.040(8) 0.004(5) 0.000(5) 0.001(7) -0.039(9) 
O14W 0.045(9) 0.17(2) 0.022(7) -0.021(9) -0.021(6) 0.076(12) 
O15W 0.085(13) 0.040(9) 0.071(12) 0.016(8) 0.024(10) -0.002(8) 
O16W 0.059(14) 0.21(4) 0.060(15) 0.02(2) 0.009(11) 0.05(2) 
O17W 0.24(3) 0.042(10) 0.050(11) -0.009(9) -0.080(16) 0.021(14) 
O18W 0.19(2) 0.058(11) 0.068(12) 0.049(10) 0.075(15) 0.055(14) 
O19W 0.060(11) 0.094(14) 0.072(12) 0.036(11) 0.024(9) 0.045(10) 
O20W 0.033(11) 0.17(3) 0.051(13) 0.064(17) -0.006(9) -0.007(13) 
O21W 0.085(15) 0.104(17) 0.067(13) 0.045(12) 0.004(11) -0.016(12) 
O22W 0.14(2) 0.18(3) 0.067(13) 0.069(16) 0.076(15) 0.09(2) 
O23W 0.096(17) 0.098(17) 0.099(18) 0.017(14) 0.004(14) 0.034(14) 
O24W 0.051(11) 0.14(2) 0.13(2) 0.094(17) -0.056(12) -0.031(12) 
O25W 0.066(17) 0.012(10) 0.017(11) 0.009(9) 0.002(11) 0.006(11) 
O26W 0.15(2) 0.086(16) 0.050(12) 0.003(11) -0.011(13) -0.006(15) 
O27W 0.032(13) 0.019(12) 0.053(17) -0.006(11) -0.016(12) 0.004(10) 
  
_geom_special_details 
; 
 All esds (except the esd in the dihedral angle between two l.s. planes) 
 are estimated using the full covariance matrix.  The cell esds are taken 
 into account individually in the estimation of esds in distances, angles 
 and torsion angles; correlations between esds in cell parameters are only 
 used when they are defined by crystal symmetry.  An approximate (isotropic) 
 treatment of cell esds is used for estimating esds involving l.s. planes. 
; 
  
loop_ 
 _geom_bond_atom_site_label_1 
 _geom_bond_atom_site_label_2 
 _geom_bond_distance 
 _geom_bond_site_symmetry_2 
 _geom_bond_publ_flag 
Mo1 O1 1.711(7) . ? 
Mo1 O2 1.713(9) . ? 
Mo1 O3 1.872(7) . ? 
Mo1 O4 1.952(6) . ? 
Mo1 O5 2.337(8) . ? 
Mo1 O6 2.355(6) . ? 
Mo1 Mo2 3.1958(12) . ? 
Mo2 O7 1.709(7) . ? 
Mo2 O8 1.716(7) . ? 
Mo2 O9 1.821(6) . ? 
Mo2 O3 2.020(7) . ? 
Mo2 O5 2.306(6) . ? 
Mo2 O6 2.340(6) . ? 
Mo3 O10 1.697(6) . ? 
Mo3 O11 1.712(6) . ? 
Mo3 O12 1.889(6) . ? 
Mo3 O9 2.024(6) . ? 
Mo3 O13 2.194(6) . ? 
Mo3 O14 2.254(6) . ? 
Mo4 O15 1.697(6) . ? 
Mo4 O16 1.714(5) . ? 
Mo4 O12 1.909(6) . ? 
Mo4 O17 2.013(6) . ? 
Mo4 O18 2.137(6) . ? 
Mo4 O19 2.261(5) . ? 
Mo5 O20 1.710(7) . ? 
Mo5 O21 1.718(8) . ? 
Mo5 O17 1.812(6) . ? 
Mo5 O22 2.020(6) . ? 
Mo5 O23 2.304(6) . ? 
Mo5 O24 2.380(9) . ? 
Mo5 Mo6 3.2113(11) . ? 
Mo6 O25 1.719(6) . ? 
Mo6 O26 1.722(7) . ? 
Mo6 O22 1.861(8) . ? 
Mo6 O27 1.913(8) . ? 
Mo6 O23 2.378(6) . ? 
Mo6 O24 2.402(7) . ? 
P1 O28 1.499(7) . ? 
P1 O14 1.527(6) . ? 
P1 O6 1.555(6) . ? 
P1 C1 1.836(9) . ? 
P2 O29 1.498(6) . ? 
P2 O13 1.534(7) . ? 
P2 O5 1.562(6) . ? 
P2 C1 1.829(10) . ? 
P3 O30 1.511(8) . ? 
P3 O18 1.515(6) . ? 
P3 O24 1.537(10) . ? 
P3 C13 1.824(9) . ? 
P4 O31 1.496(6) . ? 
P4 O19 1.522(6) . ? 
P4 O23 1.564(6) . ? 
P4 C13 1.833(8) . ? 
O4 C1 1.450(11) . ? 
O26 Na1 2.466(9) . ? 
O27 C13 1.452(11) . ? 
C1 C2 1.534(11) . ? 
C2 C3 1.523(11) . ? 
C2 H2A 0.9900 . ? 
C2 H2B 0.9900 . ? 
C3 C4 1.515(11) . ? 
C3 H3A 0.9900 . ? 
C3 H3B 0.9900 . ? 
C4 N5 1.494(9) . ? 
C4 H4A 0.9900 . ? 
C4 H4B 0.9900 . ? 
N5 C6 1.491(10) . ? 
N5 H5A 0.9100 . ? 
N5 H5B 0.9100 . ? 
C6 C7 1.507(10) . ? 
C6 H6A 0.9900 . ? 
C6 H6B 0.9900 . ? 
C7 C8 1.388(12) . ? 
C7 C12 1.392(11) . ? 
C8 C9 1.370(13) . ? 
C8 H8 0.9500 . ? 
C9 N10 1.348(13) . ? 
C9 H9 0.9500 . ? 
N10 C11 1.316(14) . ? 
N10 H10 0.8800 . ? 
C11 C12 1.391(12) . ? 
C11 H11 0.9500 . ? 
C12 H12 0.9500 . ? 
C13 C14 1.494(16) . ? 
C14 C15 1.563(15) . ? 
C14 H14A 0.9900 . ? 
C14 H14B 0.9900 . ? 
C15 C16 1.532(15) . ? 
C15 H15A 0.9900 . ? 
C15 H15B 0.9900 . ? 
C16 N17 1.504(14) . ? 
C16 H16A 0.9900 . ? 
C16 H16B 0.9900 . ? 
N17 C18 1.479(13) . ? 
N17 H17A 0.9100 . ? 
N17 H17B 0.9100 . ? 
C18 C19 1.524(15) . ? 
C18 H18A 0.9900 . ? 
C18 H18B 0.9900 . ? 
C19 C24 1.376(14) . ? 
C19 C20 1.380(15) . ? 
C20 C21 1.355(15) . ? 
C20 H20 0.9500 . ? 
C21 N22 1.324(13) . ? 
C21 H21 0.9500 . ? 
N22 C23 1.324(15) . ? 
N22 H22 0.8800 . ? 
C23 C24 1.367(16) . ? 
C23 H23 0.9500 . ? 
C24 H24 0.9500 . ? 
Na1 O2W 2.372(9) . ? 
Na1 O3W 2.441(9) . ? 
Na1 O9W 2.442(13) . ? 
Na1 O1W 2.489(8) . ? 
Na1 O1W 2.491(9) 2_666 ? 
Na1 Na1 3.756(11) 2_666 ? 
Na2 O11W 2.220(18) . ? 
Na2 O25W 2.37(3) . ? 
Na2 O18W 2.48(3) 2_766 ? 
Na2 O12W 2.52(2) . ? 
Na2 Na3 3.624(18) . ? 
Na3 O17W 2.25(3) 2_766 ? 
Na3 O23W 2.44(3) 2_776 ? 
Na3 O25W 2.45(3) . ? 
Na3 O18W 2.68(3) 2_766 ? 
Na3 Na4 4.00(4) . ? 
Na4 O19W 1.48(3) . ? 
Na4 O26W 1.95(4) . ? 
Na4 O22W 2.25(3) . ? 
Na4 O25W 2.68(3) . ? 
O1W Na1 2.491(9) 2_666 ? 
O15W O27W 1.61(3) . ? 
O16W O20W 0.99(4) . ? 
O17W Na3 2.25(3) 2_766 ? 
O18W Na2 2.48(3) 2_766 ? 
O18W Na3 2.68(3) 2_766 ? 
O23W Na3 2.44(3) 2_776 ? 
  
loop_ 
 _geom_angle_atom_site_label_1 
 _geom_angle_atom_site_label_2 
 _geom_angle_atom_site_label_3 
 _geom_angle 
 _geom_angle_site_symmetry_1 
 _geom_angle_site_symmetry_3 
 _geom_angle_publ_flag 
O1 Mo1 O2 104.0(5) . . ? 
O1 Mo1 O3 103.2(3) . . ? 
O2 Mo1 O3 101.4(4) . . ? 
O1 Mo1 O4 98.9(3) . . ? 
O2 Mo1 O4 99.5(4) . . ? 
O3 Mo1 O4 144.7(3) . . ? 
O1 Mo1 O5 93.6(4) . . ? 
O2 Mo1 O5 162.4(3) . . ? 
O3 Mo1 O5 73.3(3) . . ? 
O4 Mo1 O5 78.2(3) . . ? 
O1 Mo1 O6 162.5(4) . . ? 
O2 Mo1 O6 93.5(3) . . ? 
O3 Mo1 O6 73.5(2) . . ? 
O4 Mo1 O6 77.1(2) . . ? 
O5 Mo1 O6 68.9(2) . . ? 
O1 Mo1 Mo2 121.2(3) . . ? 
O2 Mo1 Mo2 120.6(3) . . ? 
O3 Mo1 Mo2 36.3(2) . . ? 
O4 Mo1 Mo2 108.35(19) . . ? 
O5 Mo1 Mo2 46.10(14) . . ? 
O6 Mo1 Mo2 46.91(16) . . ? 
O7 Mo2 O8 103.6(4) . . ? 
O7 Mo2 O9 102.5(3) . . ? 
O8 Mo2 O9 101.8(3) . . ? 
O7 Mo2 O3 94.9(3) . . ? 
O8 Mo2 O3 95.0(3) . . ? 
O9 Mo2 O3 152.1(3) . . ? 
O7 Mo2 O5 94.5(3) . . ? 
O8 Mo2 O5 158.4(3) . . ? 
O9 Mo2 O5 85.3(2) . . ? 
O3 Mo2 O5 71.6(3) . . ? 
O7 Mo2 O6 161.5(3) . . ? 
O8 Mo2 O6 90.2(3) . . ? 
O9 Mo2 O6 86.2(2) . . ? 
O3 Mo2 O6 71.5(2) . . ? 
O5 Mo2 O6 69.7(2) . . ? 
O7 Mo2 Mo1 114.9(3) . . ? 
O8 Mo2 Mo1 113.3(3) . . ? 
O9 Mo2 Mo1 118.80(19) . . ? 
O3 Mo2 Mo1 33.30(18) . . ? 
O5 Mo2 Mo1 46.91(19) . . ? 
O6 Mo2 Mo1 47.29(14) . . ? 
O10 Mo3 O11 102.9(3) . . ? 
O10 Mo3 O12 100.3(3) . . ? 
O11 Mo3 O12 99.1(3) . . ? 
O10 Mo3 O9 95.6(3) . . ? 
O11 Mo3 O9 92.7(3) . . ? 
O12 Mo3 O9 157.5(3) . . ? 
O10 Mo3 O13 87.3(3) . . ? 
O11 Mo3 O13 167.4(3) . . ? 
O12 Mo3 O13 86.1(2) . . ? 
O9 Mo3 O13 78.7(2) . . ? 
O10 Mo3 O14 167.7(3) . . ? 
O11 Mo3 O14 88.4(2) . . ? 
O12 Mo3 O14 82.7(2) . . ? 
O9 Mo3 O14 78.6(2) . . ? 
O13 Mo3 O14 80.9(2) . . ? 
O15 Mo4 O16 103.0(3) . . ? 
O15 Mo4 O12 98.3(3) . . ? 
O16 Mo4 O12 98.1(3) . . ? 
O15 Mo4 O17 93.8(3) . . ? 
O16 Mo4 O17 93.5(3) . . ? 
O12 Mo4 O17 161.0(2) . . ? 
O15 Mo4 O18 91.8(3) . . ? 
O16 Mo4 O18 164.5(2) . . ? 
O12 Mo4 O18 84.1(3) . . ? 
O17 Mo4 O18 80.8(3) . . ? 
O15 Mo4 O19 170.6(2) . . ? 
O16 Mo4 O19 84.7(2) . . ? 
O12 Mo4 O19 85.9(2) . . ? 
O17 Mo4 O19 80.2(2) . . ? 
O18 Mo4 O19 80.2(2) . . ? 
O20 Mo5 O21 104.1(5) . . ? 
O20 Mo5 O17 103.0(3) . . ? 
O21 Mo5 O17 101.9(3) . . ? 
O20 Mo5 O22 93.8(3) . . ? 
O21 Mo5 O22 95.4(3) . . ? 
O17 Mo5 O22 151.9(3) . . ? 
O20 Mo5 O23 160.0(4) . . ? 
O21 Mo5 O23 91.1(3) . . ? 
O17 Mo5 O23 86.1(2) . . ? 
O22 Mo5 O23 71.6(2) . . ? 
O20 Mo5 O24 92.7(4) . . ? 
O21 Mo5 O24 159.8(3) . . ? 
O17 Mo5 O24 84.7(3) . . ? 
O22 Mo5 O24 72.1(3) . . ? 
O23 Mo5 O24 70.1(2) . . ? 
O20 Mo5 Mo6 113.2(3) . . ? 
O21 Mo5 Mo6 113.5(2) . . ? 
O17 Mo5 Mo6 119.30(19) . . ? 
O22 Mo5 Mo6 32.6(2) . . ? 
O23 Mo5 Mo6 47.65(14) . . ? 
O24 Mo5 Mo6 48.11(16) . . ? 
O25 Mo6 O26 104.2(3) . . ? 
O25 Mo6 O22 101.3(4) . . ? 
O26 Mo6 O22 102.0(4) . . ? 
O25 Mo6 O27 100.9(3) . . ? 
O26 Mo6 O27 100.3(4) . . ? 
O22 Mo6 O27 143.4(3) . . ? 
O25 Mo6 O23 94.3(3) . . ? 
O26 Mo6 O23 161.5(3) . . ? 
O22 Mo6 O23 72.4(2) . . ? 
O27 Mo6 O23 77.2(2) . . ? 
O25 Mo6 O24 162.9(3) . . ? 
O26 Mo6 O24 92.9(3) . . ? 
O22 Mo6 O24 74.1(3) . . ? 
O27 Mo6 O24 76.1(3) . . ? 
O23 Mo6 O24 68.6(2) . . ? 
O25 Mo6 Mo5 120.1(3) . . ? 
O26 Mo6 Mo5 120.3(3) . . ? 
O22 Mo6 Mo5 35.8(2) . . ? 
O27 Mo6 Mo5 107.64(18) . . ? 
O23 Mo6 Mo5 45.75(14) . . ? 
O24 Mo6 Mo5 47.5(2) . . ? 
O28 P1 O14 112.4(3) . . ? 
O28 P1 O6 113.1(4) . . ? 
O14 P1 O6 111.1(3) . . ? 
O28 P1 C1 109.6(4) . . ? 
O14 P1 C1 110.0(4) . . ? 
O6 P1 C1 99.8(3) . . ? 
O29 P2 O13 111.6(4) . . ? 
O29 P2 O5 111.8(3) . . ? 
O13 P2 O5 111.4(3) . . ? 
O29 P2 C1 110.7(4) . . ? 
O13 P2 C1 109.8(3) . . ? 
O5 P2 C1 101.0(4) . . ? 
O30 P3 O18 113.2(4) . . ? 
O30 P3 O24 112.6(5) . . ? 
O18 P3 O24 111.7(4) . . ? 
O30 P3 C13 108.2(5) . . ? 
O18 P3 C13 110.5(4) . . ? 
O24 P3 C13 99.7(4) . . ? 
O31 P4 O19 112.5(3) . . ? 
O31 P4 O23 111.8(3) . . ? 
O19 P4 O23 112.0(3) . . ? 
O31 P4 C13 109.7(4) . . ? 
O19 P4 C13 109.6(3) . . ? 
O23 P4 C13 100.5(4) . . ? 
Mo1 O3 Mo2 110.4(3) . . ? 
C1 O4 Mo1 119.6(5) . . ? 
P2 O5 Mo2 128.7(3) . . ? 
P2 O5 Mo1 112.5(4) . . ? 
Mo2 O5 Mo1 87.0(2) . . ? 
P1 O6 Mo2 128.6(4) . . ? 
P1 O6 Mo1 113.8(3) . . ? 
Mo2 O6 Mo1 85.8(2) . . ? 
Mo2 O9 Mo3 158.8(3) . . ? 
Mo3 O12 Mo4 141.6(3) . . ? 
P2 O13 Mo3 136.4(4) . . ? 
P1 O14 Mo3 135.5(3) . . ? 
Mo5 O17 Mo4 157.8(3) . . ? 
P3 O18 Mo4 137.9(4) . . ? 
P4 O19 Mo4 133.5(3) . . ? 
Mo6 O22 Mo5 111.6(4) . . ? 
P4 O23 Mo5 129.6(3) . . ? 
P4 O23 Mo6 112.0(3) . . ? 
Mo5 O23 Mo6 86.60(19) . . ? 
P3 O24 Mo5 127.8(3) . . ? 
P3 O24 Mo6 114.0(4) . . ? 
Mo5 O24 Mo6 84.4(3) . . ? 
Mo6 O26 Na1 145.3(5) . . ? 
C13 O27 Mo6 121.5(6) . . ? 
O4 C1 C2 108.7(7) . . ? 
O4 C1 P2 103.0(5) . . ? 
C2 C1 P2 114.3(7) . . ? 
O4 C1 P1 103.4(6) . . ? 
C2 C1 P1 116.2(6) . . ? 
P2 C1 P1 109.7(4) . . ? 
C3 C2 C1 113.5(7) . . ? 
C3 C2 H2A 108.9 . . ? 
C1 C2 H2A 108.9 . . ? 
C3 C2 H2B 108.9 . . ? 
C1 C2 H2B 108.9 . . ? 
H2A C2 H2B 107.7 . . ? 
C4 C3 C2 111.5(7) . . ? 
C4 C3 H3A 109.3 . . ? 
C2 C3 H3A 109.3 . . ? 
C4 C3 H3B 109.3 . . ? 
C2 C3 H3B 109.3 . . ? 
H3A C3 H3B 108.0 . . ? 
N5 C4 C3 108.9(6) . . ? 
N5 C4 H4A 109.9 . . ? 
C3 C4 H4A 109.9 . . ? 
N5 C4 H4B 109.9 . . ? 
C3 C4 H4B 109.9 . . ? 
H4A C4 H4B 108.3 . . ? 
C6 N5 C4 114.1(6) . . ? 
C6 N5 H5A 108.7 . . ? 
C4 N5 H5A 108.7 . . ? 
C6 N5 H5B 108.7 . . ? 
C4 N5 H5B 108.7 . . ? 
H5A N5 H5B 107.6 . . ? 
N5 C6 C7 109.3(6) . . ? 
N5 C6 H6A 109.8 . . ? 
C7 C6 H6A 109.8 . . ? 
N5 C6 H6B 109.8 . . ? 
C7 C6 H6B 109.8 . . ? 
H6A C6 H6B 108.3 . . ? 
C8 C7 C12 119.4(7) . . ? 
C8 C7 C6 121.9(7) . . ? 
C12 C7 C6 118.7(7) . . ? 
C9 C8 C7 120.1(8) . . ? 
C9 C8 H8 120.0 . . ? 
C7 C8 H8 120.0 . . ? 
N10 C9 C8 119.1(9) . . ? 
N10 C9 H9 120.5 . . ? 
C8 C9 H9 120.5 . . ? 
C11 N10 C9 122.7(8) . . ? 
C11 N10 H10 118.7 . . ? 
C9 N10 H10 118.7 . . ? 
N10 C11 C12 120.8(8) . . ? 
N10 C11 H11 119.6 . . ? 
C12 C11 H11 119.6 . . ? 
C7 C12 C11 118.0(8) . . ? 
C7 C12 H12 121.0 . . ? 
C11 C12 H12 121.0 . . ? 
O27 C13 C14 107.3(7) . . ? 
O27 C13 P3 105.0(7) . . ? 
C14 C13 P3 114.7(7) . . ? 
O27 C13 P4 102.6(6) . . ? 
C14 C13 P4 116.6(7) . . ? 
P3 C13 P4 109.4(5) . . ? 
C13 C14 C15 116.2(8) . . ? 
C13 C14 H14A 108.2 . . ? 
C15 C14 H14A 108.2 . . ? 
C13 C14 H14B 108.2 . . ? 
C15 C14 H14B 108.2 . . ? 
H14A C14 H14B 107.4 . . ? 
C16 C15 C14 112.3(9) . . ? 
C16 C15 H15A 109.1 . . ? 
C14 C15 H15A 109.1 . . ? 
C16 C15 H15B 109.1 . . ? 
C14 C15 H15B 109.1 . . ? 
H15A C15 H15B 107.9 . . ? 
N17 C16 C15 109.1(9) . . ? 
N17 C16 H16A 109.9 . . ? 
C15 C16 H16A 109.9 . . ? 
N17 C16 H16B 109.9 . . ? 
C15 C16 H16B 109.9 . . ? 
H16A C16 H16B 108.3 . . ? 
C18 N17 C16 113.3(9) . . ? 
C18 N17 H17A 108.9 . . ? 
C16 N17 H17A 108.9 . . ? 
C18 N17 H17B 108.9 . . ? 
C16 N17 H17B 108.9 . . ? 
H17A N17 H17B 107.7 . . ? 
N17 C18 C19 113.5(10) . . ? 
N17 C18 H18A 108.9 . . ? 
C19 C18 H18A 108.9 . . ? 
N17 C18 H18B 108.9 . . ? 
C19 C18 H18B 108.9 . . ? 
H18A C18 H18B 107.7 . . ? 
C24 C19 C20 118.1(10) . . ? 
C24 C19 C18 116.5(10) . . ? 
C20 C19 C18 125.4(9) . . ? 
C21 C20 C19 120.0(9) . . ? 
C21 C20 H20 120.0 . . ? 
C19 C20 H20 120.0 . . ? 
N22 C21 C20 120.3(10) . . ? 
N22 C21 H21 119.9 . . ? 
C20 C21 H21 119.9 . . ? 
C21 N22 C23 121.9(10) . . ? 
C21 N22 H22 119.1 . . ? 
C23 N22 H22 119.1 . . ? 
N22 C23 C24 119.8(10) . . ? 
N22 C23 H23 120.1 . . ? 
C24 C23 H23 120.1 . . ? 
C23 C24 C19 119.9(11) . . ? 
C23 C24 H24 120.0 . . ? 
C19 C24 H24 120.0 . . ? 
O2W Na1 O3W 170.8(4) . . ? 
O2W Na1 O9W 79.9(4) . . ? 
O3W Na1 O9W 91.0(4) . . ? 
O2W Na1 O26 82.5(3) . . ? 
O3W Na1 O26 101.5(3) . . ? 
O9W Na1 O26 103.7(5) . . ? 
O2W Na1 O1W 87.6(3) . . ? 
O3W Na1 O1W 90.7(3) . . ? 
O9W Na1 O1W 89.6(4) . . ? 
O26 Na1 O1W 161.7(3) . . ? 
O2W Na1 O1W 102.8(3) . 2_666 ? 
O3W Na1 O1W 86.0(3) . 2_666 ? 
O9W Na1 O1W 171.1(4) . 2_666 ? 
O26 Na1 O1W 85.1(3) . 2_666 ? 
O1W Na1 O1W 82.1(3) . 2_666 ? 
O2W Na1 Na1 96.8(3) . 2_666 ? 
O3W Na1 Na1 87.8(2) . 2_666 ? 
O9W Na1 Na1 130.6(4) . 2_666 ? 
O26 Na1 Na1 124.9(3) . 2_666 ? 
O1W Na1 Na1 41.07(19) . 2_666 ? 
O1W Na1 Na1 41.04(19) 2_666 2_666 ? 
O11W Na2 O25W 99.3(8) . . ? 
O11W Na2 O18W 162.1(8) . 2_766 ? 
O25W Na2 O18W 89.7(9) . 2_766 ? 
O11W Na2 O12W 87.0(6) . . ? 
O25W Na2 O12W 167.3(9) . . ? 
O18W Na2 O12W 87.4(8) 2_766 . ? 
O11W Na2 Na3 138.7(7) . . ? 
O25W Na2 Na3 42.1(6) . . ? 
O18W Na2 Na3 47.7(7) 2_766 . ? 
O12W Na2 Na3 134.0(6) . . ? 
O17W Na3 O23W 84.5(9) 2_766 2_776 ? 
O17W Na3 O25W 96.7(9) 2_766 . ? 
O23W Na3 O25W 176.9(12) 2_776 . ? 
O17W Na3 O18W 90.4(9) 2_766 2_766 ? 
O23W Na3 O18W 93.7(9) 2_776 2_766 ? 
O25W Na3 O18W 83.5(9) . 2_766 ? 
O17W Na3 Na2 93.9(8) 2_766 . ? 
O23W Na3 Na2 136.8(8) 2_776 . ? 
O25W Na3 Na2 40.4(7) . . ? 
O18W Na3 Na2 43.1(6) 2_766 . ? 
O17W Na3 Na4 115.8(8) 2_766 . ? 
O23W Na3 Na4 140.7(8) 2_776 . ? 
O25W Na3 Na4 40.9(7) . . ? 
O18W Na3 Na4 117.8(8) 2_766 . ? 
Na2 Na3 Na4 78.0(6) . . ? 
O19W Na4 O26W 103(2) . . ? 
O19W Na4 O22W 75.7(13) . . ? 
O26W Na4 O22W 102(2) . . ? 
O19W Na4 O25W 123.8(16) . . ? 
O26W Na4 O25W 75.0(12) . . ? 
O22W Na4 O25W 160.5(14) . . ? 
O19W Na4 Na3 122(2) . . ? 
O26W Na4 Na3 110.5(12) . . ? 
O22W Na4 Na3 136.5(13) . . ? 
O25W Na4 Na3 36.7(7) . . ? 
Na1 O1W Na1 97.9(3) . 2_666 ? 
Na2 O18W Na3 89.3(7) 2_766 2_766 ? 
Na2 O25W Na3 97.5(9) . . ? 
Na2 O25W Na4 143.9(14) . . ? 
Na3 O25W Na4 102.3(12) . . ? 
  
_refine_diff_density_max    3.186 
_refine_diff_density_min   -3.486 
_refine_diff_density_rms    0.244 
  
#====================================================================
data_NaKMo6(Ale-4Py)2

_audit_creation_method            'SHELXL-2014/7' 
_shelx_SHELXL_version_number      '2014/7' 
_chemical_name_systematic         ? 
_chemical_name_common             ? 
_chemical_melting_point           ? 
_chemical_formula_moiety          ? 
_chemical_formula_sum 
 'C20 H30 K3.50 Mo6 N4 Na0.50 O45.50 P4' 
_chemical_formula_weight          1902.34 
  
loop_ 
 _atom_type_symbol 
 _atom_type_description 
 _atom_type_scat_dispersion_real 
 _atom_type_scat_dispersion_imag 
 _atom_type_scat_source 
 'C'  'C'   0.0033   0.0016 
 'International Tables Vol C Tables 4.2.6.8 and 6.1.1.4' 
 'H'  'H'   0.0000   0.0000 
 'International Tables Vol C Tables 4.2.6.8 and 6.1.1.4' 
 'N'  'N'   0.0061   0.0033 
 'International Tables Vol C Tables 4.2.6.8 and 6.1.1.4' 
 'O'  'O'   0.0106   0.0060 
 'International Tables Vol C Tables 4.2.6.8 and 6.1.1.4' 
 'P'  'P'   0.1023   0.0942 
 'International Tables Vol C Tables 4.2.6.8 and 6.1.1.4' 
 'Mo'  'Mo'  -1.6832   0.6857 
 'International Tables Vol C Tables 4.2.6.8 and 6.1.1.4' 
 'Na'  'Na'   0.0362   0.0249 
 'International Tables Vol C Tables 4.2.6.8 and 6.1.1.4' 
 'K'  'K'   0.2009   0.2494 
 'International Tables Vol C Tables 4.2.6.8 and 6.1.1.4' 
  
_space_group_crystal_system       triclinic 
_space_group_IT_number            2 
_space_group_name_H-M_alt         'P -1' 
_space_group_name_Hall            '-P 1' 
  
_shelx_space_group_comment 
; 
The symmetry employed for this shelxl refinement is uniquely defined 
by the following loop, which should always be used as a source of 
symmetry information in preference to the above space-group names. 
They are only intended as comments. 
; 
  
loop_ 
 _space_group_symop_operation_xyz 
 'x, y, z' 
 '-x, -y, -z' 
  
_cell_length_a                    17.9501(5) 
_cell_length_b                    19.4745(4) 
_cell_length_c                    19.8487(5) 
_cell_angle_alpha                 76.1880(10) 
_cell_angle_beta                  69.5900(10) 
_cell_angle_gamma                 76.6690(10) 
_cell_volume                      6231.6(3) 
_cell_formula_units_Z             4 
_cell_measurement_temperature     200(2) 
_cell_measurement_reflns_used     9694 
_cell_measurement_theta_min       2.34 
_cell_measurement_theta_max       29.96 
  
_exptl_crystal_description        platelet 
_exptl_crystal_colour             colorless 
_exptl_crystal_density_meas       ? 
_exptl_crystal_density_method     ? 
_exptl_crystal_density_diffrn     2.028 
_exptl_crystal_F_000              3704 
_exptl_transmission_factor_min    ? 
_exptl_transmission_factor_max    ? 
_exptl_crystal_size_max           0.300 
_exptl_crystal_size_mid           0.220 
_exptl_crystal_size_min           0.040 
_exptl_absorpt_coefficient_mu     1.616 
_shelx_estimated_absorpt_T_min    0.643 
_shelx_estimated_absorpt_T_max    0.938 
_exptl_absorpt_correction_type    multi-scan
_exptl_absorpt_correction_T_min   0.6856 
_exptl_absorpt_correction_T_max   0.7460 
_exptl_absorpt_process_details    'SADABS (Sheldrick, V2.10)'   
_exptl_absorpt_special_details    'Blessing, Acta Cryst. (1995) A51, 33-38'   
_diffrn_ambient_temperature       200(2) 
_diffrn_radiation_wavelength      0.71073 
_diffrn_radiation_type            MoK\a 
_diffrn_source                    'fine-focus sealed tube' 
_diffrn_measurement_device_type   'Bruker APEX-II CCD' 
_diffrn_measurement_method        '\f and \w scans' 
_diffrn_detector_area_resol_mean  ? 
_diffrn_reflns_number             227315 
_diffrn_reflns_av_unetI/netI      0.0396 
_diffrn_reflns_av_R_equivalents   0.0429 
_diffrn_reflns_limit_h_min        -25 
_diffrn_reflns_limit_h_max        25 
_diffrn_reflns_limit_k_min        -26 
_diffrn_reflns_limit_k_max        27 
_diffrn_reflns_limit_l_min        -27 
_diffrn_reflns_limit_l_max        27 
_diffrn_reflns_theta_min          1.091 
_diffrn_reflns_theta_max          30.051 
_diffrn_reflns_theta_full         25.242 
_diffrn_measured_fraction_theta_max   0.997 
_diffrn_measured_fraction_theta_full  1.000 
_diffrn_reflns_Laue_measured_fraction_max    0.997 
_diffrn_reflns_Laue_measured_fraction_full   1.000 
_diffrn_reflns_point_group_measured_fraction_max   0.997 
_diffrn_reflns_point_group_measured_fraction_full  1.000 
_reflns_number_total              36431 
_reflns_number_gt                 28528 
_reflns_threshold_expression      'I > 2\s(I)' 
_reflns_Friedel_coverage          0.000 
_reflns_Friedel_fraction_max      . 
_reflns_Friedel_fraction_full     . 
  
_reflns_special_details 
; 
 Reflections were merged by SHELXL according to the crystal 
 class for the calculation of statistics and refinement. 
  
 _reflns_Friedel_fraction is defined as the number of unique 
 Friedel pairs measured divided by the number that would be 
 possible theoretically, ignoring centric projections and 
 systematic absences. 
; 
  
_computing_data_collection        'Bruker APEX2' 
_computing_cell_refinement        'Bruker SAINT' 
_computing_data_reduction         'Bruker SAINT' 
_computing_structure_solution     'SHELXS-97 (Sheldrick, 2008)' 
_computing_structure_refinement 'SHELXL-2014/7 (Sheldrick, 2014)' 
_computing_molecular_graphics     'Bruker SHELXTL' 
_computing_publication_material   'Bruker SHELXTL' 
_refine_special_details           ? 
_refine_ls_structure_factor_coef  Fsqd 
_refine_ls_matrix_type            full 
_refine_ls_weighting_scheme       calc 
_refine_ls_weighting_details 
'w=1/[\s^2^(Fo^2^)+(0.0904P)^2^+41.6688P] where P=(Fo^2^+2Fc^2^)/3' 
_atom_sites_solution_primary      ? 
_atom_sites_solution_secondary    ? 
_atom_sites_solution_hydrogens    geom 
_refine_ls_hydrogen_treatment     constr 
_refine_ls_extinction_method      none 
_refine_ls_extinction_coef        . 
_refine_ls_number_reflns          36431 
_refine_ls_number_parameters      1558 
_refine_ls_number_restraints      0 
_refine_ls_R_factor_all           0.0760 
_refine_ls_R_factor_gt            0.0568 
_refine_ls_wR_factor_ref          0.1790 
_refine_ls_wR_factor_gt           0.1649 
_refine_ls_goodness_of_fit_ref    1.070 
_refine_ls_restrained_S_all       1.070 
_refine_ls_shift/su_max           0.001 
_refine_ls_shift/su_mean          0.000 
  
loop_ 
 _atom_site_label 
 _atom_site_type_symbol 
 _atom_site_fract_x 
 _atom_site_fract_y 
 _atom_site_fract_z 
 _atom_site_U_iso_or_equiv 
 _atom_site_adp_type 
 _atom_site_occupancy 
 _atom_site_site_symmetry_order 
 _atom_site_calc_flag 
 _atom_site_refinement_flags_posn 
 _atom_site_refinement_flags_adp 
 _atom_site_refinement_flags_occupancy 
 _atom_site_disorder_assembly 
 _atom_site_disorder_group 
Mo1 Mo 0.41663(3) 0.22428(3) 0.46865(3) 0.02392(10) Uani 1 1 d . . . . . 
Mo2 Mo 0.24523(3) 0.24260(3) 0.44430(3) 0.02198(10) Uani 1 1 d . . . . . 
Mo3 Mo 0.28093(2) 0.27364(2) 0.23997(2) 0.01476(9) Uani 1 1 d . . . . . 
Mo4 Mo 0.37102(2) 0.33169(2) 0.04557(2) 0.01300(8) Uani 1 1 d . . . . . 
Mo5 Mo 0.44596(3) 0.32001(3) -0.15508(2) 0.02048(10) Uani 1 1 d . . . . . 
Mo6 Mo 0.51901(3) 0.15654(3) -0.16821(3) 0.02345(10) Uani 1 1 d . . . . . 
Mo7 Mo 0.88509(3) 0.21151(3) 0.45673(3) 0.02778(11) Uani 1 1 d . . . . . 
Mo8 Mo 0.72494(3) 0.23189(3) 0.41282(3) 0.02593(11) Uani 1 1 d . . . . . 
Mo9 Mo 0.78462(2) 0.26846(2) 0.20756(2) 0.01581(9) Uani 1 1 d . . . . . 
Mo10 Mo 0.88362(3) 0.35030(2) 0.02433(2) 0.01644(9) Uani 1 1 d . . . . . 
Mo11 Mo 0.95439(3) 0.37435(3) -0.18229(3) 0.02284(10) Uani 1 1 d . . . . . 
Mo12 Mo 1.01850(4) 0.21769(3) -0.22377(3) 0.03377(13) Uani 1 1 d . . . . . 
P1 P 0.39972(8) 0.33309(7) 0.31608(8) 0.0177(2) Uani 1 1 d . . . . . 
P2 P 0.42393(7) 0.17446(7) 0.32066(7) 0.0148(2) Uani 1 1 d . . . . . 
P3 P 0.53564(7) 0.20823(7) -0.02710(7) 0.0152(2) Uani 1 1 d . . . . . 
P4 P 0.37435(7) 0.17871(7) -0.01532(7) 0.0157(2) Uani 1 1 d . . . . . 
P5 P 0.88764(8) 0.32151(7) 0.30215(7) 0.0174(2) Uani 1 1 d . . . . . 
P6 P 0.91404(8) 0.16353(7) 0.30003(7) 0.0180(2) Uani 1 1 d . . . . . 
P7 P 1.04160(8) 0.23305(8) -0.07104(8) 0.0196(3) Uani 1 1 d . . . . . 
P8 P 0.87473(8) 0.22364(8) -0.06486(8) 0.0201(3) Uani 1 1 d . . . . . 
O1 O 0.4583(3) 0.1436(3) 0.5077(2) 0.0356(10) Uani 1 1 d . . . . . 
O2 O 0.4363(3) 0.2853(3) 0.5071(3) 0.0410(12) Uani 1 1 d . . . . . 
O3 O 0.3056(3) 0.2264(3) 0.5161(2) 0.0303(9) Uani 1 1 d . . . . . 
O4 O 0.4971(2) 0.2369(2) 0.3738(2) 0.0220(8) Uani 1 1 d . . . . . 
O5 O 0.3669(2) 0.1744(2) 0.4004(2) 0.0197(7) Uani 1 1 d . . . . . 
O6 O 0.3462(2) 0.3150(2) 0.3967(2) 0.0219(8) Uani 1 1 d . . . . . 
O7 O 0.1959(3) 0.1705(3) 0.4834(2) 0.0334(10) Uani 1 1 d . . . . . 
O8 O 0.1766(3) 0.3129(3) 0.4787(3) 0.0374(11) Uani 1 1 d . . . . . 
O9 O 0.2402(2) 0.2602(2) 0.3503(2) 0.0208(7) Uani 1 1 d . . . . . 
O10 O 0.2384(2) 0.2066(2) 0.2334(2) 0.0223(8) Uani 1 1 d . . . . . 
O11 O 0.2104(2) 0.3482(2) 0.2295(2) 0.0230(8) Uani 1 1 d . . . . . 
O12 O 0.3559(2) 0.28742(19) 0.14446(19) 0.0168(7) Uani 1 1 d . . . . . 
O13 O 0.3765(2) 0.19052(18) 0.26676(19) 0.0161(7) Uani 1 1 d . . . . . 
O14 O 0.3515(2) 0.34262(19) 0.2628(2) 0.0183(7) Uani 1 1 d . . . . . 
O15 O 0.2753(2) 0.3779(2) 0.0559(2) 0.0207(7) Uani 1 1 d . . . . . 
O16 O 0.4230(2) 0.3979(2) 0.0406(2) 0.0201(7) Uani 1 1 d . . . . . 
O17 O 0.4019(2) 0.3452(2) -0.0649(2) 0.0191(7) Uani 1 1 d . . . . . 
O18 O 0.4909(2) 0.26335(19) 0.02259(19) 0.0152(7) Uani 1 1 d . . . . . 
O19 O 0.3370(2) 0.23611(19) 0.0322(2) 0.0174(7) Uani 1 1 d . . . . . 
O20 O 0.3686(3) 0.3508(3) -0.1914(2) 0.0333(10) Uani 1 1 d . . . . . 
O21 O 0.5116(3) 0.3799(2) -0.2009(2) 0.0338(10) Uani 1 1 d . . . . . 
O22 O 0.5012(3) 0.2480(2) -0.2221(2) 0.0290(9) Uani 1 1 d . . . . . 
O23 O 0.5397(2) 0.2394(2) -0.1083(2) 0.0200(7) Uani 1 1 d . . . . . 
O24 O 0.3971(2) 0.2123(2) -0.0984(2) 0.0188(7) Uani 1 1 d . . . . . 
O25 O 0.6199(3) 0.1281(3) -0.2084(3) 0.0370(11) Uani 1 1 d . . . . . 
O26 O 0.4707(3) 0.1076(3) -0.1964(3) 0.0363(11) Uani 1 1 d . . . . . 
O27 O 0.5138(2) 0.1021(2) -0.0703(2) 0.0205(7) Uani 1 1 d . . . . . 
O28 O 0.9230(3) 0.1301(3) 0.4979(3) 0.0421(12) Uani 1 1 d . . . . . 
O29 O 0.8993(3) 0.2720(3) 0.4996(3) 0.0442(13) Uani 1 1 d . . . . . 
O30 O 0.7737(3) 0.2129(3) 0.4943(2) 0.0348(10) Uani 1 1 d . . . . . 
O31 O 0.9768(2) 0.2225(2) 0.3669(2) 0.0222(8) Uani 1 1 d . . . . . 
O32 O 0.8497(2) 0.1618(2) 0.3770(2) 0.0236(8) Uani 1 1 d . . . . . 
O33 O 0.8278(2) 0.3012(2) 0.3791(2) 0.0231(8) Uani 1 1 d . . . . . 
O34 O 0.6740(3) 0.1609(3) 0.4502(3) 0.0394(12) Uani 1 1 d . . . . . 
O35 O 0.6554(3) 0.3044(3) 0.4424(3) 0.0427(12) Uani 1 1 d . . . . . 
O36 O 0.7338(2) 0.2464(2) 0.3165(2) 0.0237(8) Uani 1 1 d . . . . . 
O37 O 0.7492(2) 0.2036(2) 0.1869(2) 0.0230(8) Uani 1 1 d . . . . . 
O38 O 0.7139(2) 0.3425(2) 0.1983(2) 0.0237(8) Uani 1 1 d . . . . . 
O39 O 0.8655(2) 0.2896(2) 0.1177(2) 0.0201(7) Uani 1 1 d . . . . . 
O40 O 0.8471(2) 0.33225(19) 0.2430(2) 0.0182(7) Uani 1 1 d . . . . . 
O41 O 0.8763(2) 0.18131(19) 0.2385(2) 0.0188(7) Uani 1 1 d . . . . . 
O42 O 0.9406(3) 0.4037(2) 0.0354(2) 0.0250(8) Uani 1 1 d . . . . . 
O43 O 0.7905(3) 0.4019(2) 0.0385(2) 0.0274(9) Uani 1 1 d . . . . . 
O44 O 0.9158(3) 0.3840(2) -0.0859(2) 0.0241(8) Uani 1 1 d . . . . . 
O45 O 0.8454(2) 0.2696(2) -0.0059(2) 0.0200(7) Uani 1 1 d . . . . . 
O46 O 1.0033(2) 0.2776(2) -0.0104(2) 0.0201(7) Uani 1 1 d . . . . . 
O47 O 1.0256(3) 0.4296(3) -0.2179(2) 0.0335(10) Uani 1 1 d . . . . . 
O48 O 0.8772(3) 0.4224(3) -0.2146(2) 0.0336(10) Uani 1 1 d . . . . . 
O49 O 1.0022(3) 0.3151(3) -0.2628(2) 0.0340(10) Uani 1 1 d . . . . . 
O50 O 1.0454(2) 0.2789(2) -0.1480(2) 0.0231(8) Uani 1 1 d . . . . . 
O51 O 0.8986(2) 0.2702(2) -0.1430(2) 0.0250(8) Uani 1 1 d . . . . . 
O52 O 1.1173(4) 0.1907(3) -0.2691(3) 0.0531(15) Uani 1 1 d . . . . . 
O53 O 0.9678(5) 0.1832(3) -0.2637(3) 0.0594(17) Uani 1 1 d . . . . . 
O54 O 1.0076(3) 0.1485(2) -0.1341(2) 0.0314(9) Uani 1 1 d . . . . . 
O55 O 0.4412(3) 0.3961(2) 0.3022(3) 0.0286(9) Uani 1 1 d . . . . . 
O56 O 0.4830(2) 0.1067(2) 0.3150(2) 0.0220(8) Uani 1 1 d . . . . . 
O57 O 0.6174(2) 0.1759(2) -0.0202(2) 0.0234(8) Uani 1 1 d . . . . . 
O58 O 0.3247(2) 0.1206(2) 0.0012(2) 0.0233(8) Uani 1 1 d . . . . . 
O59 O 0.9266(3) 0.3841(2) 0.2955(2) 0.0269(9) Uani 1 1 d . . . . . 
O60 O 0.9736(2) 0.0955(2) 0.2955(2) 0.0264(8) Uani 1 1 d . . . . . 
O61 O 1.1234(2) 0.1906(2) -0.0706(3) 0.0294(9) Uani 1 1 d . . . . . 
O62 O 0.8172(3) 0.1759(2) -0.0573(3) 0.0312(9) Uani 1 1 d . . . . . 
C1 C 0.4743(3) 0.2503(3) 0.3080(3) 0.0163(9) Uani 1 1 d . . . . . 
C2 C 0.5498(3) 0.2546(3) 0.2425(3) 0.0212(10) Uani 1 1 d . . . . . 
H2A H 0.5798 0.2056 0.2380 0.025 Uiso 1 1 calc R U . . . 
H2B H 0.5847 0.2820 0.2513 0.025 Uiso 1 1 calc R U . . . 
C3 C 0.5335(3) 0.2901(3) 0.1702(3) 0.0259(12) Uani 1 1 d . . . . . 
H3A H 0.4948 0.2658 0.1631 0.031 Uiso 1 1 calc R U . . . 
H3B H 0.5089 0.3409 0.1723 0.031 Uiso 1 1 calc R U . . . 
C4 C 0.6098(3) 0.2864(3) 0.1066(3) 0.0210(10) Uani 1 1 d . . . . . 
H4A H 0.6537 0.2979 0.1191 0.025 Uiso 1 1 calc R U . . . 
H4B H 0.6261 0.2373 0.0950 0.025 Uiso 1 1 calc R U . . . 
N5 N 0.5958(3) 0.3385(2) 0.0421(2) 0.0178(8) Uani 1 1 d . . . . . 
H5A H 0.5533 0.3290 0.0328 0.021 Uiso 1 1 calc R U . . . 
H5B H 0.5826 0.3835 0.0528 0.021 Uiso 1 1 calc R U . . . 
C6 C 0.6672(3) 0.3361(3) -0.0247(3) 0.0226(11) Uani 1 1 d . . . . . 
H6A H 0.6712 0.2940 -0.0463 0.027 Uiso 1 1 calc R U . . . 
H6B H 0.7168 0.3311 -0.0116 0.027 Uiso 1 1 calc R U . . . 
C7 C 0.6600(3) 0.4030(3) -0.0794(3) 0.0214(10) Uani 1 1 d . . . . . 
C8 C 0.7177(4) 0.4475(3) -0.1010(3) 0.0270(12) Uani 1 1 d . . . . . 
H8 H 0.7621 0.4351 -0.0825 0.032 Uiso 1 1 calc R U . . . 
C9 C 0.7091(4) 0.5103(3) -0.1502(4) 0.0325(13) Uani 1 1 d . . . . . 
H9 H 0.7484 0.5410 -0.1663 0.039 Uiso 1 1 calc R U . . . 
N10 N 0.6467(4) 0.5278(3) -0.1748(3) 0.0313(11) Uani 1 1 d . . . . . 
H10 H 0.6425 0.5681 -0.2058 0.038 Uiso 1 1 calc R U . . . 
C11 C 0.5899(5) 0.4870(4) -0.1549(4) 0.0450(19) Uani 1 1 d . . . . . 
H11 H 0.5456 0.5018 -0.1735 0.054 Uiso 1 1 calc R U . . . 
C12 C 0.5955(5) 0.4229(4) -0.1068(4) 0.0397(17) Uani 1 1 d . . . . . 
H12 H 0.5558 0.3930 -0.0929 0.048 Uiso 1 1 calc R U . . . 
C13 C 0.4749(3) 0.1380(3) -0.0077(3) 0.0166(9) Uani 1 1 d . . . . . 
C14 C 0.4751(3) 0.0828(3) 0.0612(3) 0.0202(10) Uani 1 1 d . . . . . 
H14A H 0.5299 0.0724 0.0661 0.024 Uiso 1 1 calc R U . . . 
H14B H 0.4627 0.0378 0.0560 0.024 Uiso 1 1 calc R U . . . 
C15 C 0.4147(4) 0.1070(3) 0.1310(3) 0.0262(12) Uani 1 1 d . . . . . 
H15A H 0.4290 0.1502 0.1384 0.031 Uiso 1 1 calc R U . . . 
H15B H 0.3602 0.1201 0.1255 0.031 Uiso 1 1 calc R U . . . 
C16 C 0.4136(4) 0.0485(3) 0.1972(3) 0.0242(11) Uani 1 1 d . . . . . 
H16A H 0.4177 0.0014 0.1843 0.029 Uiso 1 1 calc R U . . . 
H16B H 0.4602 0.0470 0.2136 0.029 Uiso 1 1 calc R U . . . 
N17 N 0.3378(3) 0.0633(2) 0.2565(3) 0.0225(9) Uani 1 1 d . . . . . 
H17A H 0.3331 0.1082 0.2651 0.027 Uiso 1 1 calc R U . . . 
H17B H 0.2958 0.0627 0.2412 0.027 Uiso 1 1 calc R U . . . 
C18 C 0.3317(4) 0.0123(3) 0.3257(3) 0.0311(13) Uani 1 1 d . . . . . 
H18A H 0.3735 0.0168 0.3455 0.037 Uiso 1 1 calc R U . . . 
H18B H 0.3425 -0.0371 0.3157 0.037 Uiso 1 1 calc R U . . . 
C19 C 0.2505(5) 0.0240(3) 0.3822(4) 0.0334(14) Uani 1 1 d . . . . . 
C20 C 0.1868(4) 0.0756(4) 0.3694(4) 0.0373(15) Uani 1 1 d . . . . . 
H20 H 0.1934 0.1068 0.3237 0.045 Uiso 1 1 calc R U . . . 
C21 C 0.1140(5) 0.0809(4) 0.4238(5) 0.049(2) Uani 1 1 d . . . . . 
H21 H 0.0697 0.1155 0.4157 0.059 Uiso 1 1 calc R U . . . 
N22 N 0.1057(5) 0.0369(4) 0.4886(4) 0.0538(19) Uani 1 1 d . . . . . 
H22 H 0.0589 0.0412 0.5231 0.065 Uiso 1 1 calc R U . . . 
C23 C 0.1651(6) -0.0124(4) 0.5022(4) 0.050(2) Uani 1 1 d . . . . . 
H23 H 0.1566 -0.0430 0.5485 0.060 Uiso 1 1 calc R U . . . 
C24 C 0.2384(5) -0.0198(4) 0.4506(4) 0.0436(18) Uani 1 1 d . . . . . 
H24 H 0.2814 -0.0547 0.4611 0.052 Uiso 1 1 calc R U . . . 
C25 C 0.9621(3) 0.2389(3) 0.2971(3) 0.0172(9) Uani 1 1 d . . . . . 
C26 C 1.0430(3) 0.2445(3) 0.2371(3) 0.0202(10) Uani 1 1 d . . . . . 
H26A H 1.0727 0.2738 0.2499 0.024 Uiso 1 1 calc R U . . . 
H26B H 1.0752 0.1959 0.2352 0.024 Uiso 1 1 calc R U . . . 
C27 C 1.0347(3) 0.2776(3) 0.1618(3) 0.0251(12) Uani 1 1 d . . . . . 
H27A H 1.0049 0.2486 0.1486 0.030 Uiso 1 1 calc R U . . . 
H27B H 1.0032 0.3265 0.1631 0.030 Uiso 1 1 calc R U . . . 
C28 C 1.1166(3) 0.2812(3) 0.1044(3) 0.0194(10) Uani 1 1 d . . . . . 
H28A H 1.1528 0.2971 0.1235 0.023 Uiso 1 1 calc R U . . . 
H28B H 1.1415 0.2333 0.0912 0.023 Uiso 1 1 calc R U . . . 
N29 N 1.1044(3) 0.3334(3) 0.0389(2) 0.0211(9) Uani 1 1 d . . . . . 
H29A H 1.0899 0.3783 0.0499 0.025 Uiso 1 1 calc R U . . . 
H29B H 1.0630 0.3235 0.0282 0.025 Uiso 1 1 calc R U . . . 
C30 C 1.1777(3) 0.3322(3) -0.0276(3) 0.0177(9) Uani 1 1 d . . . . . 
H30A H 1.1801 0.2935 -0.0532 0.021 Uiso 1 1 calc R U . . . 
H30B H 1.2269 0.3225 -0.0128 0.021 Uiso 1 1 calc R U . . . 
C31 C 1.1739(3) 0.4033(3) -0.0779(3) 0.0171(9) Uani 1 1 d . . . . . 
C32 C 1.2372(3) 0.4414(3) -0.1000(3) 0.0226(11) Uani 1 1 d . . . . . 
H32 H 1.2827 0.4230 -0.0833 0.027 Uiso 1 1 calc R U . . . 
C33 C 1.2334(4) 0.5058(3) -0.1461(3) 0.0258(11) Uani 1 1 d . . . . . 
H33 H 1.2773 0.5315 -0.1630 0.031 Uiso 1 1 calc R U . . . 
N34 N 1.1682(3) 0.5327(3) -0.1675(3) 0.0247(10) Uani 1 1 d . . . . . 
H34 H 1.1666 0.5746 -0.1965 0.030 Uiso 1 1 calc R U . . . 
C35 C 1.1059(4) 0.4986(3) -0.1466(3) 0.0269(12) Uani 1 1 d . . . . . 
H35 H 1.0606 0.5194 -0.1631 0.032 Uiso 1 1 calc R U . . . 
C36 C 1.1064(4) 0.4333(3) -0.1012(3) 0.0259(11) Uani 1 1 d . . . . . 
H36 H 1.0616 0.4088 -0.0858 0.031 Uiso 1 1 calc R U . . . 
C37 C 0.9743(3) 0.1717(3) -0.0641(3) 0.0218(10) Uani 1 1 d . . . . . 
C38 C 0.9736(4) 0.1058(3) -0.0045(3) 0.0247(11) Uani 1 1 d . . . . . 
H38A H 0.9477 0.0707 -0.0135 0.030 Uiso 1 1 calc R U . . . 
H38B H 1.0300 0.0835 -0.0080 0.030 Uiso 1 1 calc R U . . . 
C39 C 0.9302(4) 0.1210(3) 0.0722(3) 0.0296(13) Uani 1 1 d . . . . . 
H39A H 0.8740 0.1440 0.0761 0.036 Uiso 1 1 calc R U . . . 
H39B H 0.9570 0.1546 0.0825 0.036 Uiso 1 1 calc R U . . . 
C40 C 0.9302(4) 0.0517(3) 0.1289(4) 0.0301(13) Uani 1 1 d . . . . . 
H40A H 0.9304 0.0108 0.1073 0.036 Uiso 1 1 calc R U . . . 
H40B H 0.9790 0.0421 0.1442 0.036 Uiso 1 1 calc R U . . . 
N41 N 0.8567(3) 0.0601(3) 0.1933(3) 0.0249(10) Uani 1 1 d . . . . . 
H41A H 0.8530 0.1020 0.2079 0.030 Uiso 1 1 calc R U . . . 
H41B H 0.8126 0.0631 0.1796 0.030 Uiso 1 1 calc R U . . . 
C42 C 0.8557(4) 0.0006(3) 0.2564(4) 0.0334(14) Uani 1 1 d . . . . . 
H42A H 0.8999 0.0009 0.2753 0.040 Uiso 1 1 calc R U . . . 
H42B H 0.8659 -0.0456 0.2395 0.040 Uiso 1 1 calc R U . . . 
C43 C 0.7768(4) 0.0061(3) 0.3175(3) 0.0290(13) Uani 1 1 d . . . . . 
C44 C 0.7155(4) 0.0640(4) 0.3211(4) 0.0341(14) Uani 1 1 d . . . . . 
H44 H 0.7208 0.1041 0.2826 0.041 Uiso 1 1 calc R U . . . 
C45 C 0.6461(4) 0.0639(4) 0.3806(4) 0.0398(16) Uani 1 1 d . . . . . 
H45 H 0.6039 0.1039 0.3829 0.048 Uiso 1 1 calc R U . . . 
N46 N 0.6388(4) 0.0077(4) 0.4343(3) 0.0427(15) Uani 1 1 d . . . . . 
H46 H 0.5943 0.0080 0.4716 0.051 Uiso 1 1 calc R U . . . 
C47 C 0.6968(5) -0.0489(5) 0.4332(5) 0.052(2) Uani 1 1 d . . . . . 
H47 H 0.6902 -0.0875 0.4733 0.062 Uiso 1 1 calc R U . . . 
C48 C 0.7659(5) -0.0522(4) 0.3751(4) 0.0444(18) Uani 1 1 d . . . . . 
H48 H 0.8062 -0.0937 0.3740 0.053 Uiso 1 1 calc R U . . . 
K1 K 1.06234(9) 0.43827(8) 0.27484(10) 0.0390(3) Uani 1 1 d . . . . . 
K2 K 0.72948(9) 0.09391(9) -0.01630(11) 0.0432(4) Uani 1 1 d . . . . . 
K3 K 1.1642(3) 0.1230(3) 0.0464(3) 0.0636(11) Uani 0.5 1 d . . P . . 
K4 K 1.0048(3) 0.3524(4) 0.5047(2) 0.091(2) Uani 0.5 1 d . . P . . 
K5 K 0.5836(3) 0.3767(4) 0.3341(4) 0.0896(17) Uani 0.5 1 d . . P . . 
K6 K 0.8677(6) 0.0868(3) -0.1631(5) 0.121(3) Uani 0.5 1 d . . P . . 
Na1 Na 0.3709(7) 0.5286(5) 0.4531(5) 0.089(3) Uani 0.5 1 d . . P . . 
Na2 Na 0.3125(9) 0.2902(9) 0.7235(8) 0.059(4) Uani 0.25 1 d . . P . . 
O1W O 0.7247(3) 0.1082(3) 0.1089(4) 0.0511(15) Uani 1 1 d . . . . . 
O2W O 0.6672(4) -0.0139(4) 0.0842(4) 0.069(2) Uani 1 1 d . . . . . 
O3W O 0.8388(5) 0.0046(4) -0.0182(9) 0.148(6) Uani 1 1 d . . . . . 
O4W O 0.8302(9) 0.5030(8) 0.3448(11) 0.100(7) Uani 0.5 1 d . . P . . 
O5W O 0.2398(3) 0.0080(3) 0.2120(3) 0.0373(11) Uani 1 1 d . . . . . 
O6W O 0.5332(3) 0.0031(3) 0.5696(3) 0.0454(13) Uani 1 1 d . . . . . 
O7W O 1.1122(3) 0.4520(3) 0.1046(3) 0.0431(12) Uani 1 1 d . . . . . 
O8W O 1.0985(3) 0.0577(3) 0.1844(3) 0.0531(15) Uani 1 1 d . . . . . 
O9W O 1.0683(3) 0.3141(3) 0.3819(3) 0.0391(11) Uani 1 1 d . . . . . 
O10W O 0.8525(5) 0.2343(3) 0.6570(3) 0.062(2) Uani 1 1 d . . . . . 
O11W O 0.6091(3) 0.0425(3) 0.2182(3) 0.0536(15) Uani 1 1 d . . . . . 
O12W O 0.3298(3) -0.0231(3) 0.0718(3) 0.0360(9) Uani 1 1 d . . . . . 
O13W O 0.6050(5) 0.4706(3) 0.0691(4) 0.071(2) Uani 1 1 d . . . . . 
O14W O 0.8070(4) -0.0610(4) 0.1455(5) 0.077(2) Uani 1 1 d . . . . . 
O15W O 1.1830(6) 0.4423(4) 0.3411(6) 0.101(3) Uani 1 1 d . . . . . 
O16W O 0.5439(4) 0.1942(10) 0.5853(6) 0.192(8) Uani 1 1 d . . . . . 
O17W O 0.3982(6) 0.5333(4) 0.3290(5) 0.0311(19) Uani 0.5 1 d . . P . . 
O18W O 0.3221(5) -0.1656(4) 0.3712(4) 0.080(2) Uani 1 1 d . . . . . 
O19W O 0.2987(5) 0.3426(5) 0.6132(4) 0.095(3) Uani 1 1 d . . . . . 
O20W O 1.2785(4) 0.2101(6) -0.1688(4) 0.086(3) Uani 1 1 d . . . . . 
O21W O -0.0139(6) 0.0269(4) 0.6167(4) 0.103(4) Uani 1 1 d . . . . . 
O22W O 0.2899(7) 0.4311(5) 0.4794(6) 0.042(2) Uani 0.5 1 d . . P . . 
O23W O 0.2430(7) 0.5715(6) 0.3057(7) 0.049(3) Uani 0.5 1 d . . P . . 
O24W O 0.2802(6) 0.2032(7) 0.6668(5) 0.051(3) Uani 0.5 1 d . . P . . 
O25W O 1.0398(6) 0.2165(6) 0.5746(5) 0.047(3) Uani 0.5 1 d . . P . . 
O26W O 0.9170(7) 0.3591(7) 0.6330(6) 0.053(3) Uani 0.5 1 d . . P . . 
O27W O 0.1782(8) -0.0966(6) 0.3273(6) 0.052(3) Uani 0.5 1 d . . P . . 
O28W O 0.1347(8) 0.3630(7) 0.6161(5) 0.058(3) Uani 0.5 1 d . . P . . 
O29W O 0.7769(7) 0.2990(6) -0.2102(7) 0.051(3) Uani 0.5 1 d . . P . . 
O30W O 0.1970(6) 0.3412(8) 0.7582(7) 0.060(3) Uani 0.5 1 d . . P . . 
O31W O 0.5912(10) -0.0918(6) 0.3077(7) 0.065(4) Uani 0.5 1 d . . P . . 
O32W O 0.5766(7) 0.4483(7) 0.2168(7) 0.057(3) Uani 0.5 1 d . . P . . 
O33W O 0.5959(13) 0.5299(8) 0.3090(7) 0.094(6) Uani 0.5 1 d . . P . . 
O34W O 0.7362(7) 0.1624(8) -0.1609(6) 0.066(5) Uani 0.5 1 d . . P . . 
O35W O 0.4247(10) 0.2708(10) 0.6702(7) 0.095(3) Uani 0.5 1 d . . P . . 
O36W O 0.4958(11) 0.4144(9) 0.4401(12) 0.101(3) Uani 0.5 1 d . . P . . 
O37W O 0.3154(6) 0.5455(5) 0.5807(6) 0.0360(9) Uani 0.5 1 d . . P . . 
  
loop_ 
 _atom_site_aniso_label 
 _atom_site_aniso_U_11 
 _atom_site_aniso_U_22 
 _atom_site_aniso_U_33 
 _atom_site_aniso_U_23 
 _atom_site_aniso_U_13 
 _atom_site_aniso_U_12 
Mo1 0.0264(2) 0.0306(3) 0.0158(2) -0.00249(18) -0.01047(18) -0.00203(19) 
Mo2 0.0194(2) 0.0284(2) 0.0139(2) -0.00137(17) -0.00340(16) -0.00096(17) 
Mo3 0.01346(18) 0.01534(19) 0.01485(19) 0.00144(15) -0.00572(15) -0.00324(14) 
Mo4 0.01233(17) 0.01308(18) 0.01387(19) -0.00075(14) -0.00542(14) -0.00211(14) 
Mo5 0.0250(2) 0.0203(2) 0.0141(2) -0.00141(16) -0.00693(17) -0.00008(17) 
Mo6 0.0252(2) 0.0238(2) 0.0211(2) -0.00905(18) -0.00797(18) 0.00306(18) 
Mo7 0.0273(2) 0.0403(3) 0.0134(2) 0.00103(19) -0.00509(18) -0.0090(2) 
Mo8 0.0198(2) 0.0351(3) 0.0174(2) -0.00118(19) 0.00104(17) -0.00817(19) 
Mo9 0.01387(18) 0.0164(2) 0.0171(2) 0.00030(15) -0.00483(15) -0.00556(14) 
Mo10 0.01750(19) 0.0188(2) 0.0143(2) -0.00280(15) -0.00495(15) -0.00546(15) 
Mo11 0.0262(2) 0.0271(2) 0.0154(2) -0.00298(17) -0.00754(18) -0.00350(18) 
Mo12 0.0457(3) 0.0335(3) 0.0223(3) -0.0117(2) -0.0092(2) -0.0017(2) 
P1 0.0198(6) 0.0152(6) 0.0202(6) 0.0003(5) -0.0103(5) -0.0038(5) 
P2 0.0148(5) 0.0142(6) 0.0141(6) 0.0009(4) -0.0056(4) -0.0015(4) 
P3 0.0117(5) 0.0142(6) 0.0204(6) -0.0019(5) -0.0065(5) -0.0022(4) 
P4 0.0136(5) 0.0161(6) 0.0203(6) -0.0033(5) -0.0082(5) -0.0031(4) 
P5 0.0175(6) 0.0180(6) 0.0175(6) -0.0005(5) -0.0065(5) -0.0052(5) 
P6 0.0174(6) 0.0171(6) 0.0166(6) 0.0023(5) -0.0042(5) -0.0041(5) 
P7 0.0137(5) 0.0233(7) 0.0218(7) -0.0039(5) -0.0056(5) -0.0027(5) 
P8 0.0190(6) 0.0221(6) 0.0243(7) -0.0051(5) -0.0107(5) -0.0059(5) 
O1 0.035(2) 0.043(3) 0.025(2) 0.0056(19) -0.0158(19) 0.000(2) 
O2 0.047(3) 0.053(3) 0.032(3) -0.015(2) -0.018(2) -0.008(2) 
O3 0.029(2) 0.045(3) 0.0130(18) -0.0032(17) -0.0068(16) -0.0002(19) 
O4 0.0240(18) 0.028(2) 0.0177(18) -0.0012(15) -0.0124(15) -0.0041(15) 
O5 0.0199(17) 0.0212(18) 0.0145(17) 0.0019(14) -0.0055(14) -0.0015(14) 
O6 0.0238(18) 0.0232(19) 0.0194(19) -0.0037(15) -0.0090(15) -0.0014(15) 
O7 0.028(2) 0.042(3) 0.021(2) 0.0100(18) -0.0026(17) -0.0110(19) 
O8 0.031(2) 0.050(3) 0.027(2) -0.013(2) -0.0080(19) 0.006(2) 
O9 0.0166(16) 0.029(2) 0.0140(17) 0.0009(15) -0.0040(14) -0.0045(14) 
O10 0.0207(18) 0.0215(19) 0.027(2) 0.0017(15) -0.0112(16) -0.0077(14) 
O11 0.0188(17) 0.0225(19) 0.025(2) 0.0036(15) -0.0083(15) -0.0025(14) 
O12 0.0164(16) 0.0205(18) 0.0133(16) 0.0021(13) -0.0057(13) -0.0058(13) 
O13 0.0191(16) 0.0139(16) 0.0155(17) 0.0002(13) -0.0076(14) -0.0022(13) 
O14 0.0180(16) 0.0170(17) 0.0215(18) 0.0002(14) -0.0092(14) -0.0046(13) 
O15 0.0191(17) 0.0223(19) 0.0196(18) -0.0035(15) -0.0073(15) 0.0005(14) 
O16 0.0222(18) 0.0172(17) 0.0209(19) -0.0006(14) -0.0057(15) -0.0075(14) 
O17 0.0216(17) 0.0170(17) 0.0166(17) -0.0026(14) -0.0064(14) 0.0014(13) 
O18 0.0129(15) 0.0162(16) 0.0178(17) -0.0014(13) -0.0065(13) -0.0039(12) 
O19 0.0141(15) 0.0195(17) 0.0203(18) -0.0041(14) -0.0070(14) -0.0025(13) 
O20 0.039(2) 0.038(2) 0.026(2) -0.0090(19) -0.0188(19) 0.0064(19) 
O21 0.044(3) 0.028(2) 0.022(2) 0.0058(17) -0.0045(19) -0.0119(19) 
O22 0.038(2) 0.027(2) 0.0175(19) -0.0058(16) -0.0057(17) 0.0025(17) 
O23 0.0168(16) 0.0203(18) 0.0208(19) -0.0019(14) -0.0031(14) -0.0048(14) 
O24 0.0187(17) 0.0205(18) 0.0190(18) -0.0043(14) -0.0087(14) -0.0010(14) 
O25 0.031(2) 0.043(3) 0.030(2) -0.016(2) -0.0033(19) 0.008(2) 
O26 0.043(3) 0.033(2) 0.042(3) -0.019(2) -0.022(2) 0.005(2) 
O27 0.0210(18) 0.0180(18) 0.0246(19) -0.0085(15) -0.0095(15) 0.0017(14) 
O28 0.041(3) 0.052(3) 0.023(2) 0.015(2) -0.010(2) -0.010(2) 
O29 0.045(3) 0.068(4) 0.024(2) -0.015(2) -0.011(2) -0.012(3) 
O30 0.029(2) 0.051(3) 0.019(2) 0.0014(19) -0.0018(17) -0.012(2) 
O31 0.0231(18) 0.030(2) 0.0136(17) 0.0040(15) -0.0091(15) -0.0071(15) 
O32 0.0205(18) 0.025(2) 0.0204(19) 0.0055(15) -0.0039(15) -0.0086(15) 
O33 0.0213(18) 0.029(2) 0.0163(18) -0.0031(15) -0.0027(15) -0.0053(15) 
O34 0.033(2) 0.053(3) 0.027(2) 0.008(2) -0.0018(19) -0.024(2) 
O35 0.024(2) 0.062(3) 0.036(3) -0.019(2) 0.001(2) -0.001(2) 
O36 0.0164(17) 0.028(2) 0.023(2) 0.0025(16) -0.0036(15) -0.0075(15) 
O37 0.0217(18) 0.0221(19) 0.027(2) 0.0005(15) -0.0085(16) -0.0099(15) 
O38 0.0193(18) 0.0219(19) 0.029(2) 0.0008(16) -0.0083(16) -0.0050(14) 
O39 0.0167(16) 0.0263(19) 0.0169(18) 0.0000(14) -0.0045(14) -0.0078(14) 
O40 0.0199(17) 0.0149(16) 0.0212(18) -0.0001(14) -0.0085(14) -0.0055(13) 
O41 0.0196(17) 0.0158(17) 0.0195(18) 0.0013(14) -0.0064(14) -0.0041(13) 
O42 0.031(2) 0.024(2) 0.022(2) -0.0041(16) -0.0050(16) -0.0140(16) 
O43 0.031(2) 0.026(2) 0.024(2) -0.0079(16) -0.0082(17) 0.0019(16) 
O44 0.031(2) 0.025(2) 0.0145(18) -0.0011(15) -0.0070(16) -0.0041(16) 
O45 0.0168(16) 0.0234(19) 0.0234(19) -0.0073(15) -0.0081(15) -0.0035(14) 
O46 0.0172(16) 0.0249(19) 0.0211(19) -0.0034(15) -0.0083(14) -0.0058(14) 
O47 0.035(2) 0.039(3) 0.024(2) 0.0002(18) -0.0062(18) -0.012(2) 
O48 0.035(2) 0.044(3) 0.025(2) 0.0004(19) -0.0165(19) -0.007(2) 
O49 0.044(3) 0.036(2) 0.022(2) -0.0075(18) -0.0101(19) -0.003(2) 
O50 0.0205(18) 0.032(2) 0.0174(18) -0.0071(16) -0.0056(15) -0.0023(15) 
O51 0.0257(19) 0.032(2) 0.023(2) -0.0068(16) -0.0125(16) -0.0062(16) 
O52 0.051(3) 0.050(3) 0.042(3) -0.020(3) 0.002(3) 0.009(3) 
O53 0.103(5) 0.050(3) 0.043(3) -0.014(3) -0.037(3) -0.018(3) 
O54 0.039(2) 0.029(2) 0.026(2) -0.0120(18) -0.0070(19) -0.0013(18) 
O55 0.033(2) 0.0196(19) 0.040(2) -0.0009(17) -0.0197(19) -0.0089(16) 
O56 0.0196(17) 0.0206(18) 0.0223(19) -0.0008(15) -0.0078(15) 0.0023(14) 
O57 0.0155(17) 0.0199(18) 0.037(2) -0.0044(16) -0.0124(16) -0.0008(14) 
O58 0.0180(17) 0.0229(19) 0.034(2) -0.0065(16) -0.0099(16) -0.0073(14) 
O59 0.028(2) 0.023(2) 0.036(2) -0.0034(17) -0.0146(18) -0.0088(16) 
O60 0.027(2) 0.0199(19) 0.026(2) 0.0020(16) -0.0071(17) -0.0008(15) 
O61 0.0165(18) 0.034(2) 0.035(2) -0.0024(18) -0.0089(17) -0.0008(16) 
O62 0.033(2) 0.032(2) 0.039(3) -0.0075(19) -0.019(2) -0.0133(18) 
C1 0.019(2) 0.017(2) 0.016(2) 0.0011(18) -0.0113(19) -0.0026(17) 
C2 0.015(2) 0.024(3) 0.022(3) 0.006(2) -0.008(2) -0.0041(19) 
C3 0.017(2) 0.035(3) 0.023(3) 0.005(2) -0.010(2) -0.006(2) 
C4 0.017(2) 0.023(3) 0.020(3) 0.005(2) -0.007(2) -0.0051(19) 
N5 0.0141(18) 0.020(2) 0.017(2) 0.0037(16) -0.0067(16) -0.0037(15) 
C6 0.018(2) 0.020(2) 0.024(3) 0.005(2) -0.004(2) -0.0055(19) 
C7 0.022(2) 0.021(3) 0.021(3) -0.001(2) -0.006(2) -0.0051(19) 
C8 0.024(3) 0.024(3) 0.028(3) 0.008(2) -0.007(2) -0.010(2) 
C9 0.038(3) 0.025(3) 0.030(3) 0.007(2) -0.008(3) -0.012(3) 
N10 0.048(3) 0.022(2) 0.021(2) 0.0041(19) -0.012(2) -0.006(2) 
C11 0.057(5) 0.041(4) 0.048(4) 0.021(3) -0.039(4) -0.023(3) 
C12 0.050(4) 0.040(4) 0.039(4) 0.019(3) -0.031(3) -0.027(3) 
C13 0.017(2) 0.014(2) 0.020(2) -0.0034(18) -0.0074(19) -0.0015(17) 
C14 0.021(2) 0.014(2) 0.026(3) 0.0000(19) -0.009(2) -0.0047(18) 
C15 0.036(3) 0.016(2) 0.023(3) 0.001(2) -0.009(2) -0.002(2) 
C16 0.028(3) 0.018(2) 0.025(3) 0.002(2) -0.009(2) -0.005(2) 
N17 0.032(2) 0.014(2) 0.021(2) 0.0027(17) -0.0098(19) -0.0063(17) 
C18 0.039(3) 0.029(3) 0.027(3) 0.012(2) -0.017(3) -0.015(3) 
C19 0.051(4) 0.026(3) 0.026(3) 0.005(2) -0.014(3) -0.019(3) 
C20 0.046(4) 0.031(3) 0.024(3) 0.008(3) -0.003(3) -0.012(3) 
C21 0.051(4) 0.035(4) 0.042(4) 0.006(3) 0.003(4) -0.010(3) 
N22 0.074(5) 0.038(4) 0.031(3) 0.005(3) 0.010(3) -0.027(3) 
C23 0.080(6) 0.038(4) 0.023(3) 0.009(3) -0.002(4) -0.029(4) 
C24 0.071(5) 0.030(3) 0.034(4) 0.007(3) -0.021(4) -0.021(3) 
C25 0.017(2) 0.020(2) 0.014(2) 0.0005(18) -0.0063(18) -0.0032(18) 
C26 0.015(2) 0.025(3) 0.019(2) 0.002(2) -0.0063(19) -0.0056(19) 
C27 0.016(2) 0.041(3) 0.016(2) 0.004(2) -0.0032(19) -0.013(2) 
C28 0.017(2) 0.022(2) 0.015(2) 0.0032(19) -0.0033(19) -0.0057(18) 
N29 0.0153(19) 0.030(2) 0.017(2) 0.0030(18) -0.0055(16) -0.0070(17) 
C30 0.015(2) 0.019(2) 0.018(2) 0.0015(18) -0.0059(18) -0.0042(17) 
C31 0.019(2) 0.017(2) 0.014(2) -0.0001(18) -0.0021(18) -0.0061(18) 
C32 0.020(2) 0.021(3) 0.028(3) 0.001(2) -0.010(2) -0.0062(19) 
C33 0.027(3) 0.025(3) 0.026(3) 0.003(2) -0.009(2) -0.012(2) 
N34 0.036(3) 0.017(2) 0.019(2) 0.0025(17) -0.011(2) -0.0044(19) 
C35 0.030(3) 0.026(3) 0.028(3) 0.002(2) -0.016(2) -0.005(2) 
C36 0.027(3) 0.030(3) 0.024(3) 0.002(2) -0.012(2) -0.010(2) 
C37 0.024(2) 0.022(3) 0.024(3) -0.009(2) -0.009(2) -0.003(2) 
C38 0.028(3) 0.020(3) 0.028(3) -0.006(2) -0.010(2) -0.004(2) 
C39 0.038(3) 0.019(3) 0.025(3) -0.001(2) -0.004(2) -0.003(2) 
C40 0.027(3) 0.022(3) 0.034(3) 0.000(2) -0.006(2) -0.001(2) 
N41 0.025(2) 0.018(2) 0.032(3) 0.0004(19) -0.013(2) -0.0042(18) 
C42 0.040(3) 0.021(3) 0.038(4) 0.006(2) -0.016(3) -0.007(2) 
C43 0.042(3) 0.022(3) 0.029(3) 0.007(2) -0.020(3) -0.015(2) 
C44 0.036(3) 0.033(3) 0.032(3) 0.011(3) -0.013(3) -0.018(3) 
C45 0.038(4) 0.047(4) 0.035(4) 0.009(3) -0.015(3) -0.018(3) 
N46 0.035(3) 0.054(4) 0.036(3) 0.018(3) -0.012(3) -0.027(3) 
C47 0.053(5) 0.053(5) 0.046(5) 0.027(4) -0.019(4) -0.032(4) 
C48 0.048(4) 0.038(4) 0.044(4) 0.020(3) -0.020(3) -0.021(3) 
K1 0.0320(7) 0.0308(7) 0.0538(10) 0.0004(6) -0.0174(7) -0.0057(5) 
K2 0.0258(6) 0.0379(8) 0.0740(12) -0.0192(8) -0.0197(7) -0.0044(6) 
K3 0.050(2) 0.073(3) 0.066(3) -0.009(2) -0.016(2) -0.0118(19) 
K4 0.049(2) 0.193(6) 0.043(2) -0.063(3) 0.0114(18) -0.040(3) 
K5 0.067(3) 0.128(5) 0.091(4) -0.031(4) -0.034(3) -0.021(3) 
K6 0.191(8) 0.067(4) 0.145(7) -0.017(4) -0.115(6) -0.001(4) 
Na1 0.119(8) 0.081(6) 0.071(6) -0.019(5) -0.015(6) -0.041(6) 
Na2 0.056(8) 0.068(9) 0.052(8) -0.020(7) -0.008(7) -0.011(7) 
O1W 0.038(3) 0.040(3) 0.085(5) -0.030(3) -0.017(3) -0.007(2) 
O2W 0.069(4) 0.097(5) 0.061(4) -0.036(4) -0.024(4) -0.020(4) 
O3W 0.049(4) 0.060(5) 0.372(19) -0.104(8) -0.087(8) 0.022(4) 
O4W 0.065(9) 0.065(9) 0.143(15) -0.085(10) 0.050(9) -0.021(7) 
O5W 0.031(2) 0.048(3) 0.040(3) -0.016(2) -0.011(2) -0.010(2) 
O6W 0.045(3) 0.039(3) 0.039(3) 0.011(2) -0.011(2) -0.003(2) 
O7W 0.033(2) 0.029(2) 0.059(3) -0.009(2) -0.004(2) -0.0038(19) 
O8W 0.037(3) 0.067(4) 0.038(3) 0.000(3) -0.006(2) 0.006(3) 
O9W 0.028(2) 0.052(3) 0.040(3) -0.008(2) -0.010(2) -0.011(2) 
O10W 0.119(6) 0.063(4) 0.030(3) 0.011(3) -0.042(3) -0.059(4) 
O11W 0.037(3) 0.068(4) 0.053(4) -0.033(3) -0.002(3) 0.001(3) 
O12W 0.034(2) 0.035(2) 0.040(2) -0.0065(18) -0.0114(19) -0.0067(17) 
O13W 0.130(7) 0.029(3) 0.046(4) -0.004(3) -0.017(4) -0.016(3) 
O14W 0.067(4) 0.070(5) 0.119(7) -0.049(5) -0.058(5) 0.022(4) 
O15W 0.102(6) 0.069(5) 0.156(8) 0.025(5) -0.082(6) -0.041(4) 
O16W 0.031(3) 0.49(2) 0.115(8) -0.209(12) -0.005(4) -0.026(7) 
O17W 0.039(5) 0.013(4) 0.033(5) -0.007(3) -0.002(4) 0.000(3) 
O18W 0.097(6) 0.083(5) 0.033(3) 0.008(3) -0.002(3) -0.008(4) 
O19W 0.093(5) 0.131(7) 0.032(3) -0.023(4) -0.020(3) 0.047(5) 
O20W 0.062(4) 0.164(9) 0.052(4) -0.010(5) -0.027(3) -0.050(5) 
O21W 0.110(7) 0.072(5) 0.049(4) 0.035(4) 0.018(4) 0.024(5) 
O22W 0.054(6) 0.030(5) 0.040(6) -0.026(4) -0.006(5) 0.001(4) 
O23W 0.044(6) 0.032(5) 0.086(9) -0.019(5) -0.035(6) -0.005(4) 
O24W 0.022(4) 0.102(10) 0.020(5) -0.005(5) 0.006(4) -0.019(5) 
O25W 0.024(4) 0.069(7) 0.021(5) 0.008(5) 0.010(4) 0.003(4) 
O26W 0.065(7) 0.067(8) 0.036(6) -0.022(5) -0.038(6) 0.020(6) 
O27W 0.064(7) 0.039(6) 0.041(6) 0.003(5) -0.004(5) -0.012(5) 
O28W 0.076(8) 0.087(9) 0.010(4) -0.011(5) 0.009(5) -0.041(7) 
O29W 0.053(6) 0.059(7) 0.067(8) -0.006(6) -0.054(6) -0.005(5) 
O30W 0.025(5) 0.097(10) 0.048(7) -0.037(7) 0.013(5) -0.005(6) 
O31W 0.111(11) 0.044(6) 0.056(8) -0.009(6) -0.065(8) 0.017(7) 
O32W 0.033(5) 0.070(8) 0.062(8) 0.004(6) -0.016(5) -0.010(5) 
O33W 0.182(19) 0.055(8) 0.039(7) 0.032(6) -0.042(10) -0.041(10) 
O34W 0.051(6) 0.138(12) 0.031(5) -0.053(7) 0.026(5) -0.076(8) 
O35W 0.093(5) 0.131(7) 0.032(3) -0.023(4) -0.020(3) 0.047(5) 
O36W 0.102(6) 0.069(5) 0.156(8) 0.025(5) -0.082(6) -0.041(4) 
O37W 0.034(2) 0.035(2) 0.040(2) -0.0065(18) -0.0114(19) -0.0067(17) 
  
_geom_special_details 
; 
 All esds (except the esd in the dihedral angle between two l.s. planes) 
 are estimated using the full covariance matrix.  The cell esds are taken 
 into account individually in the estimation of esds in distances, angles 
 and torsion angles; correlations between esds in cell parameters are only 
 used when they are defined by crystal symmetry.  An approximate (isotropic) 
 treatment of cell esds is used for estimating esds involving l.s. planes. 
; 
  
loop_ 
 _geom_bond_atom_site_label_1 
 _geom_bond_atom_site_label_2 
 _geom_bond_distance 
 _geom_bond_site_symmetry_2 
 _geom_bond_publ_flag 
Mo1 O1 1.705(4) . ? 
Mo1 O2 1.713(5) . ? 
Mo1 O3 1.879(4) . ? 
Mo1 O4 1.934(4) . ? 
Mo1 O5 2.334(4) . ? 
Mo1 O6 2.405(4) . ? 
Mo1 Mo2 3.2055(7) . ? 
Mo2 O7 1.712(4) . ? 
Mo2 O8 1.715(5) . ? 
Mo2 O9 1.846(4) . ? 
Mo2 O3 2.003(4) . ? 
Mo2 O5 2.276(4) . ? 
Mo2 O6 2.348(4) . ? 
Mo3 O10 1.708(4) . ? 
Mo3 O11 1.717(4) . ? 
Mo3 O12 1.903(4) . ? 
Mo3 O9 2.023(4) . ? 
Mo3 O13 2.189(3) . ? 
Mo3 O14 2.256(4) . ? 
Mo4 O15 1.712(4) . ? 
Mo4 O16 1.724(4) . ? 
Mo4 O12 1.897(3) . ? 
Mo4 O17 2.032(4) . ? 
Mo4 O19 2.186(4) . ? 
Mo4 O18 2.213(3) . ? 
Mo5 O20 1.708(4) . ? 
Mo5 O21 1.719(4) . ? 
Mo5 O17 1.823(4) . ? 
Mo5 O22 2.012(4) . ? 
Mo5 O23 2.309(4) . ? 
Mo5 O24 2.339(4) . ? 
Mo5 Mo6 3.1867(7) . ? 
Mo6 O26 1.718(5) . ? 
Mo6 O25 1.721(5) . ? 
Mo6 O22 1.866(4) . ? 
Mo6 O27 1.960(4) . ? 
Mo6 O24 2.323(4) . ? 
Mo6 O23 2.378(4) . ? 
Mo7 O28 1.707(5) . ? 
Mo7 O29 1.716(5) . ? 
Mo7 O30 1.870(4) . ? 
Mo7 O31 1.967(4) . ? 
Mo7 O33 2.339(4) . ? 
Mo7 O32 2.359(4) . ? 
Mo7 Mo8 3.1996(7) . ? 
Mo8 O34 1.708(5) . ? 
Mo8 O35 1.723(5) . ? 
Mo8 O36 1.820(4) . ? 
Mo8 O30 2.019(5) . ? 
Mo8 O32 2.309(4) . ? 
Mo8 O33 2.353(4) . ? 
Mo8 K5 3.768(6) . ? 
Mo9 O38 1.708(4) . ? 
Mo9 O37 1.722(4) . ? 
Mo9 O39 1.891(4) . ? 
Mo9 O36 2.012(4) . ? 
Mo9 O41 2.210(4) . ? 
Mo9 O40 2.216(4) . ? 
Mo9 K5 4.059(6) . ? 
Mo10 O43 1.707(4) . ? 
Mo10 O42 1.713(4) . ? 
Mo10 O39 1.910(4) . ? 
Mo10 O44 2.040(4) . ? 
Mo10 O45 2.129(4) . ? 
Mo10 O46 2.265(4) . ? 
Mo11 O47 1.712(5) . ? 
Mo11 O48 1.715(4) . ? 
Mo11 O44 1.833(4) . ? 
Mo11 O49 2.022(5) . ? 
Mo11 O50 2.314(4) . ? 
Mo11 O51 2.316(4) . ? 
Mo11 Mo12 3.1983(8) . ? 
Mo11 K1 3.6688(16) 2_765 ? 
Mo12 O52 1.707(6) . ? 
Mo12 O53 1.717(6) . ? 
Mo12 O49 1.866(5) . ? 
Mo12 O54 1.937(5) . ? 
Mo12 O50 2.355(4) . ? 
Mo12 O51 2.368(4) . ? 
Mo12 K6 3.837(9) . ? 
P1 O55 1.501(4) . ? 
P1 O14 1.541(4) . ? 
P1 O6 1.556(4) . ? 
P1 C1 1.843(5) . ? 
P1 K5 3.742(5) . ? 
P2 O56 1.491(4) . ? 
P2 O13 1.523(4) . ? 
P2 O5 1.557(4) . ? 
P2 C1 1.828(5) . ? 
P3 O57 1.498(4) . ? 
P3 O18 1.525(4) . ? 
P3 O23 1.564(4) . ? 
P3 C13 1.831(5) . ? 
P3 K2 3.7188(19) . ? 
P4 O58 1.505(4) . ? 
P4 O19 1.519(4) . ? 
P4 O24 1.565(4) . ? 
P4 C13 1.840(5) . ? 
P4 K3 3.865(5) 1_455 ? 
P5 O59 1.498(4) . ? 
P5 O40 1.535(4) . ? 
P5 O33 1.551(4) . ? 
P5 C25 1.838(5) . ? 
P6 O60 1.497(4) . ? 
P6 O41 1.528(4) . ? 
P6 O32 1.559(4) . ? 
P6 C25 1.847(5) . ? 
P7 O61 1.511(4) . ? 
P7 O46 1.523(4) . ? 
P7 O50 1.562(4) . ? 
P7 C37 1.838(6) . ? 
P7 K3 3.726(5) . ? 
P8 O62 1.491(4) . ? 
P8 O45 1.517(4) . ? 
P8 O51 1.567(4) . ? 
P8 C37 1.842(6) . ? 
P8 K6 3.706(7) . ? 
P8 K2 3.772(2) . ? 
O4 C1 1.451(6) . ? 
O4 K5 3.243(8) . ? 
O8 K4 2.891(7) 1_455 ? 
O11 K1 2.808(4) 1_455 ? 
O20 Na2 2.818(16) 1_554 ? 
O27 C13 1.451(6) . ? 
O29 K4 2.762(8) . ? 
O31 C25 1.446(6) . ? 
O35 K5 2.814(8) . ? 
O36 K5 3.232(8) . ? 
O38 K5 2.988(8) . ? 
O47 K1 2.893(5) 2_765 ? 
O48 K1 2.978(5) 2_765 ? 
O53 K6 2.829(11) . ? 
O54 C37 1.445(7) . ? 
O54 K6 3.288(9) . ? 
O55 K5 2.764(7) . ? 
O57 K2 2.274(4) . ? 
O58 K3 2.695(6) 1_455 ? 
O59 K1 2.739(4) . ? 
O61 K3 2.635(6) . ? 
O62 K2 2.310(4) . ? 
O62 K6 2.817(9) . ? 
C1 C2 1.519(7) . ? 
C2 C3 1.532(7) . ? 
C2 H2A 0.9900 . ? 
C2 H2B 0.9900 . ? 
C3 C4 1.506(8) . ? 
C3 H3A 0.9900 . ? 
C3 H3B 0.9900 . ? 
C4 N5 1.489(6) . ? 
C4 H4A 0.9900 . ? 
C4 H4B 0.9900 . ? 
N5 C6 1.489(7) . ? 
N5 H5A 0.9100 . ? 
N5 H5B 0.9100 . ? 
C6 C7 1.495(7) . ? 
C6 H6A 0.9900 . ? 
C6 H6B 0.9900 . ? 
C7 C12 1.384(8) . ? 
C7 C8 1.390(8) . ? 
C8 C9 1.387(8) . ? 
C8 H8 0.9500 . ? 
C9 N10 1.316(9) . ? 
C9 H9 0.9500 . ? 
N10 C11 1.329(9) . ? 
N10 H10 0.8800 . ? 
C11 C12 1.386(9) . ? 
C11 H11 0.9500 . ? 
C12 H12 0.9500 . ? 
C13 C14 1.525(7) . ? 
C14 C15 1.531(8) . ? 
C14 H14A 0.9900 . ? 
C14 H14B 0.9900 . ? 
C15 C16 1.518(8) . ? 
C15 H15A 0.9900 . ? 
C15 H15B 0.9900 . ? 
C16 N17 1.478(8) . ? 
C16 H16A 0.9900 . ? 
C16 H16B 0.9900 . ? 
N17 C18 1.477(7) . ? 
N17 H17A 0.9100 . ? 
N17 H17B 0.9100 . ? 
C18 C19 1.504(10) . ? 
C18 H18A 0.9900 . ? 
C18 H18B 0.9900 . ? 
C19 C20 1.390(10) . ? 
C19 C24 1.395(9) . ? 
C20 C21 1.375(10) . ? 
C20 H20 0.9500 . ? 
C21 N22 1.344(10) . ? 
C21 H21 0.9500 . ? 
N22 C23 1.318(12) . ? 
N22 H22 0.8800 . ? 
C23 C24 1.359(12) . ? 
C23 H23 0.9500 . ? 
C24 H24 0.9500 . ? 
C25 C26 1.531(7) . ? 
C26 C27 1.524(7) . ? 
C26 H26A 0.9900 . ? 
C26 H26B 0.9900 . ? 
C27 C28 1.519(7) . ? 
C27 H27A 0.9900 . ? 
C27 H27B 0.9900 . ? 
C28 N29 1.497(7) . ? 
C28 K3 3.368(7) . ? 
C28 H28A 0.9900 . ? 
C28 H28B 0.9900 . ? 
N29 C30 1.504(7) . ? 
N29 H29A 0.9100 . ? 
N29 H29B 0.9100 . ? 
C30 C31 1.504(7) . ? 
C30 H30A 0.9900 . ? 
C30 H30B 0.9900 . ? 
C31 C32 1.386(7) . ? 
C31 C36 1.400(7) . ? 
C32 C33 1.368(8) . ? 
C32 H32 0.9500 . ? 
C33 N34 1.335(8) . ? 
C33 H33 0.9500 . ? 
N34 C35 1.323(8) . ? 
N34 H34 0.8800 . ? 
C35 C36 1.372(8) . ? 
C35 H35 0.9500 . ? 
C36 H36 0.9500 . ? 
C37 C38 1.522(8) . ? 
C38 C39 1.514(8) . ? 
C38 H38A 0.9900 . ? 
C38 H38B 0.9900 . ? 
C39 C40 1.536(8) . ? 
C39 H39A 0.9900 . ? 
C39 H39B 0.9900 . ? 
C40 N41 1.492(8) . ? 
C40 H40A 0.9900 . ? 
C40 H40B 0.9900 . ? 
N41 C42 1.486(8) . ? 
N41 H41A 0.9100 . ? 
N41 H41B 0.9100 . ? 
C42 C43 1.511(10) . ? 
C42 H42A 0.9900 . ? 
C42 H42B 0.9900 . ? 
C43 C44 1.378(10) . ? 
C43 C48 1.401(8) . ? 
C44 C45 1.386(10) . ? 
C44 H44 0.9500 . ? 
C45 N46 1.327(9) . ? 
C45 H45 0.9500 . ? 
N46 C47 1.329(11) . ? 
N46 H46 0.8800 . ? 
C47 C48 1.369(12) . ? 
C47 H47 0.9500 . ? 
C48 H48 0.9500 . ? 
K1 O11 2.808(4) 1_655 ? 
K1 O9W 2.821(6) . ? 
K1 O47 2.893(5) 2_765 ? 
K1 O15W 2.923(8) . ? 
K1 O48 2.978(5) 2_765 ? 
K1 O7W 3.139(6) . ? 
K1 Mo11 3.6687(16) 2_765 ? 
K1 K4 4.306(6) . ? 
K2 O3W 2.298(7) . ? 
K2 O1W 2.535(7) . ? 
K2 O12W 2.543(5) 2_655 ? 
K2 O2W 2.676(8) . ? 
K2 O34W 2.836(13) . ? 
K2 K6 3.108(10) . ? 
K2 K3 4.305(5) 2_755 ? 
K3 O3W 2.689(9) 2_755 ? 
K3 O58 2.695(6) 1_655 ? 
K3 O8W 2.700(7) . ? 
K3 P4 3.865(5) 1_655 ? 
K3 K6 4.245(9) 2_755 ? 
K3 K2 4.305(5) 2_755 ? 
K4 O26W 2.501(12) . ? 
K4 O9W 2.517(7) . ? 
K4 O25W 2.723(13) . ? 
K4 O8 2.891(7) 1_655 ? 
K5 O36W 2.31(2) . ? 
K5 O32W 2.440(14) . ? 
K5 O33W 2.952(16) . ? 
K5 Na1 4.554(13) . ? 
K6 O34W 2.470(17) . ? 
K6 O8W 2.839(9) 2_755 ? 
K6 O3W 2.872(18) . ? 
K6 K3 4.245(9) 2_755 ? 
Na1 O17W 2.321(14) . ? 
Na1 O37W 2.450(14) . ? 
Na1 O22W 2.503(14) . ? 
Na1 O36W 2.76(2) . ? 
Na2 O35W 1.92(2) . ? 
Na2 O30W 2.035(18) . ? 
Na2 O19W 2.256(17) . ? 
Na2 O20W 2.304(18) 1_456 ? 
Na2 O24W 2.51(2) . ? 
Na2 O20 2.818(16) 1_556 ? 
O3W K3 2.689(9) 2_755 ? 
O8W K6 2.839(9) 2_755 ? 
O12W K2 2.543(5) 2_655 ? 
O20W Na2 2.304(18) 1_654 ? 
  
loop_ 
 _geom_angle_atom_site_label_1 
 _geom_angle_atom_site_label_2 
 _geom_angle_atom_site_label_3 
 _geom_angle 
 _geom_angle_site_symmetry_1 
 _geom_angle_site_symmetry_3 
 _geom_angle_publ_flag 
O1 Mo1 O2 104.0(3) . . ? 
O1 Mo1 O3 103.3(2) . . ? 
O2 Mo1 O3 101.0(2) . . ? 
O1 Mo1 O4 100.4(2) . . ? 
O2 Mo1 O4 99.7(2) . . ? 
O3 Mo1 O4 143.56(16) . . ? 
O1 Mo1 O5 94.4(2) . . ? 
O2 Mo1 O5 161.6(2) . . ? 
O3 Mo1 O5 72.54(16) . . ? 
O4 Mo1 O5 78.39(15) . . ? 
O1 Mo1 O6 162.7(2) . . ? 
O2 Mo1 O6 93.3(2) . . ? 
O3 Mo1 O6 72.18(16) . . ? 
O4 Mo1 O6 77.02(15) . . ? 
O5 Mo1 O6 68.38(13) . . ? 
O1 Mo1 Mo2 120.45(17) . . ? 
O2 Mo1 Mo2 120.59(18) . . ? 
O3 Mo1 Mo2 35.62(12) . . ? 
O4 Mo1 Mo2 108.01(11) . . ? 
O5 Mo1 Mo2 45.20(9) . . ? 
O6 Mo1 Mo2 46.85(10) . . ? 
O7 Mo2 O8 103.9(2) . . ? 
O7 Mo2 O9 101.9(2) . . ? 
O8 Mo2 O9 100.8(2) . . ? 
O7 Mo2 O3 96.3(2) . . ? 
O8 Mo2 O3 95.0(2) . . ? 
O9 Mo2 O3 152.10(17) . . ? 
O7 Mo2 O5 94.01(19) . . ? 
O8 Mo2 O5 159.0(2) . . ? 
O9 Mo2 O5 85.91(15) . . ? 
O3 Mo2 O5 71.81(16) . . ? 
O7 Mo2 O6 162.36(18) . . ? 
O8 Mo2 O6 90.2(2) . . ? 
O9 Mo2 O6 85.47(15) . . ? 
O3 Mo2 O6 71.54(16) . . ? 
O5 Mo2 O6 70.32(14) . . ? 
O7 Mo2 Mo1 114.93(15) . . ? 
O8 Mo2 Mo1 114.14(17) . . ? 
O9 Mo2 Mo1 119.01(12) . . ? 
O3 Mo2 Mo1 33.12(12) . . ? 
O5 Mo2 Mo1 46.69(10) . . ? 
O6 Mo2 Mo1 48.34(9) . . ? 
O10 Mo3 O11 102.72(19) . . ? 
O10 Mo3 O12 99.86(18) . . ? 
O11 Mo3 O12 98.45(17) . . ? 
O10 Mo3 O9 95.74(18) . . ? 
O11 Mo3 O9 93.59(18) . . ? 
O12 Mo3 O9 157.64(15) . . ? 
O10 Mo3 O13 87.44(16) . . ? 
O11 Mo3 O13 168.38(17) . . ? 
O12 Mo3 O13 85.14(14) . . ? 
O9 Mo3 O13 79.62(14) . . ? 
O10 Mo3 O14 167.43(16) . . ? 
O11 Mo3 O14 88.73(16) . . ? 
O12 Mo3 O14 83.32(15) . . ? 
O9 Mo3 O14 78.15(15) . . ? 
O13 Mo3 O14 80.69(13) . . ? 
O15 Mo4 O16 102.01(18) . . ? 
O15 Mo4 O12 97.76(17) . . ? 
O16 Mo4 O12 99.69(17) . . ? 
O15 Mo4 O17 94.27(16) . . ? 
O16 Mo4 O17 91.98(17) . . ? 
O12 Mo4 O17 161.08(15) . . ? 
O15 Mo4 O19 91.57(16) . . ? 
O16 Mo4 O19 164.25(16) . . ? 
O12 Mo4 O19 86.16(15) . . ? 
O17 Mo4 O19 78.94(15) . . ? 
O15 Mo4 O18 171.84(16) . . ? 
O16 Mo4 O18 84.57(16) . . ? 
O12 Mo4 O18 85.75(14) . . ? 
O17 Mo4 O18 80.56(14) . . ? 
O19 Mo4 O18 81.28(13) . . ? 
O20 Mo5 O21 103.4(2) . . ? 
O20 Mo5 O17 102.28(19) . . ? 
O21 Mo5 O17 102.7(2) . . ? 
O20 Mo5 O22 93.7(2) . . ? 
O21 Mo5 O22 95.0(2) . . ? 
O17 Mo5 O22 152.51(17) . . ? 
O20 Mo5 O23 158.97(19) . . ? 
O21 Mo5 O23 93.19(19) . . ? 
O17 Mo5 O23 86.33(15) . . ? 
O22 Mo5 O23 71.69(16) . . ? 
O20 Mo5 O24 91.46(19) . . ? 
O21 Mo5 O24 160.95(19) . . ? 
O17 Mo5 O24 85.41(15) . . ? 
O22 Mo5 O24 71.85(16) . . ? 
O23 Mo5 O24 69.91(13) . . ? 
O20 Mo5 Mo6 111.91(16) . . ? 
O21 Mo5 Mo6 115.39(16) . . ? 
O17 Mo5 Mo6 119.22(12) . . ? 
O22 Mo5 Mo6 33.29(12) . . ? 
O23 Mo5 Mo6 48.09(10) . . ? 
O24 Mo5 Mo6 46.67(9) . . ? 
O26 Mo6 O25 104.5(2) . . ? 
O26 Mo6 O22 102.9(2) . . ? 
O25 Mo6 O22 102.8(2) . . ? 
O26 Mo6 O27 100.9(2) . . ? 
O25 Mo6 O27 96.2(2) . . ? 
O22 Mo6 O27 144.54(17) . . ? 
O26 Mo6 O24 91.47(19) . . ? 
O25 Mo6 O24 163.9(2) . . ? 
O22 Mo6 O24 74.67(16) . . ? 
O27 Mo6 O24 78.79(14) . . ? 
O26 Mo6 O23 160.46(19) . . ? 
O25 Mo6 O23 95.04(19) . . ? 
O22 Mo6 O23 72.44(16) . . ? 
O27 Mo6 O23 76.35(14) . . ? 
O24 Mo6 O23 68.99(13) . . ? 
O26 Mo6 Mo5 119.57(16) . . ? 
O25 Mo6 Mo5 122.65(18) . . ? 
O22 Mo6 Mo5 36.28(13) . . ? 
O27 Mo6 Mo5 108.46(11) . . ? 
O24 Mo6 Mo5 47.09(9) . . ? 
O23 Mo6 Mo5 46.25(9) . . ? 
O28 Mo7 O29 104.3(3) . . ? 
O28 Mo7 O30 103.2(2) . . ? 
O29 Mo7 O30 102.5(2) . . ? 
O28 Mo7 O31 98.3(2) . . ? 
O29 Mo7 O31 98.7(2) . . ? 
O30 Mo7 O31 144.80(18) . . ? 
O28 Mo7 O33 162.6(2) . . ? 
O29 Mo7 O33 93.0(2) . . ? 
O30 Mo7 O33 73.42(17) . . ? 
O31 Mo7 O33 77.77(14) . . ? 
O28 Mo7 O32 93.6(2) . . ? 
O29 Mo7 O32 162.0(2) . . ? 
O30 Mo7 O32 73.44(18) . . ? 
O31 Mo7 O32 77.68(15) . . ? 
O33 Mo7 O32 69.01(14) . . ? 
O28 Mo7 Mo8 120.86(19) . . ? 
O29 Mo7 Mo8 121.42(19) . . ? 
O30 Mo7 Mo8 36.18(14) . . ? 
O31 Mo7 Mo8 108.62(11) . . ? 
O33 Mo7 Mo8 47.20(10) . . ? 
O32 Mo7 Mo8 46.08(10) . . ? 
O34 Mo8 O35 104.4(3) . . ? 
O34 Mo8 O36 103.7(2) . . ? 
O35 Mo8 O36 102.8(2) . . ? 
O34 Mo8 O30 93.0(2) . . ? 
O35 Mo8 O30 95.0(2) . . ? 
O36 Mo8 O30 151.59(17) . . ? 
O34 Mo8 O32 94.6(2) . . ? 
O35 Mo8 O32 157.7(2) . . ? 
O36 Mo8 O32 83.59(16) . . ? 
O30 Mo8 O32 72.12(17) . . ? 
O34 Mo8 O33 159.8(2) . . ? 
O35 Mo8 O33 89.2(2) . . ? 
O36 Mo8 O33 87.39(15) . . ? 
O30 Mo8 O33 70.69(16) . . ? 
O32 Mo8 O33 69.61(14) . . ? 
O34 Mo8 Mo7 113.24(17) . . ? 
O35 Mo8 Mo7 112.79(18) . . ? 
O36 Mo8 Mo7 118.48(12) . . ? 
O30 Mo8 Mo7 33.15(12) . . ? 
O32 Mo8 Mo7 47.38(11) . . ? 
O33 Mo8 Mo7 46.83(10) . . ? 
O34 Mo8 K5 105.0(2) . . ? 
O35 Mo8 K5 44.6(2) . . ? 
O36 Mo8 K5 59.01(16) . . ? 
O30 Mo8 K5 138.40(18) . . ? 
O32 Mo8 K5 140.69(14) . . ? 
O33 Mo8 K5 95.12(14) . . ? 
Mo7 Mo8 K5 140.31(9) . . ? 
O38 Mo9 O37 102.63(19) . . ? 
O38 Mo9 O39 98.77(18) . . ? 
O37 Mo9 O39 98.98(18) . . ? 
O38 Mo9 O36 92.90(18) . . ? 
O37 Mo9 O36 96.55(18) . . ? 
O39 Mo9 O36 158.01(16) . . ? 
O38 Mo9 O41 168.35(18) . . ? 
O37 Mo9 O41 86.65(16) . . ? 
O39 Mo9 O41 86.54(15) . . ? 
O36 Mo9 O41 78.90(15) . . ? 
O38 Mo9 O40 89.22(17) . . ? 
O37 Mo9 O40 167.83(16) . . ? 
O39 Mo9 O40 81.69(15) . . ? 
O36 Mo9 O40 79.88(15) . . ? 
O41 Mo9 O40 81.25(13) . . ? 
O38 Mo9 K5 41.00(17) . . ? 
O37 Mo9 K5 103.74(16) . . ? 
O39 Mo9 K5 137.08(16) . . ? 
O36 Mo9 K5 51.90(15) . . ? 
O41 Mo9 K5 130.29(14) . . ? 
O40 Mo9 K5 83.32(12) . . ? 
O43 Mo10 O42 103.3(2) . . ? 
O43 Mo10 O39 98.59(18) . . ? 
O42 Mo10 O39 98.43(18) . . ? 
O43 Mo10 O44 93.15(19) . . ? 
O42 Mo10 O44 92.60(18) . . ? 
O39 Mo10 O44 161.56(17) . . ? 
O43 Mo10 O45 91.90(18) . . ? 
O42 Mo10 O45 163.74(18) . . ? 
O39 Mo10 O45 84.75(16) . . ? 
O44 Mo10 O45 80.68(16) . . ? 
O43 Mo10 O46 170.47(17) . . ? 
O42 Mo10 O46 83.66(17) . . ? 
O39 Mo10 O46 86.65(15) . . ? 
O44 Mo10 O46 79.90(15) . . ? 
O45 Mo10 O46 80.60(14) . . ? 
O47 Mo11 O48 102.6(2) . . ? 
O47 Mo11 O44 102.3(2) . . ? 
O48 Mo11 O44 102.3(2) . . ? 
O47 Mo11 O49 94.7(2) . . ? 
O48 Mo11 O49 94.8(2) . . ? 
O44 Mo11 O49 152.40(19) . . ? 
O47 Mo11 O50 92.12(19) . . ? 
O48 Mo11 O50 160.9(2) . . ? 
O44 Mo11 O50 85.99(16) . . ? 
O49 Mo11 O50 71.66(17) . . ? 
O47 Mo11 O51 159.9(2) . . ? 
O48 Mo11 O51 93.61(19) . . ? 
O44 Mo11 O51 85.44(16) . . ? 
O49 Mo11 O51 71.93(17) . . ? 
O50 Mo11 O51 69.68(14) . . ? 
O47 Mo11 Mo12 113.59(17) . . ? 
O48 Mo11 Mo12 114.52(17) . . ? 
O44 Mo11 Mo12 119.31(13) . . ? 
O49 Mo11 Mo12 33.10(13) . . ? 
O50 Mo11 Mo12 47.30(10) . . ? 
O51 Mo11 Mo12 47.61(11) . . ? 
O47 Mo11 K1 50.32(16) . 2_765 ? 
O48 Mo11 K1 53.23(16) . 2_765 ? 
O44 Mo11 K1 101.93(13) . 2_765 ? 
O49 Mo11 K1 105.65(14) . 2_765 ? 
O50 Mo11 K1 142.41(10) . 2_765 ? 
O51 Mo11 K1 146.79(10) . 2_765 ? 
Mo12 Mo11 K1 138.71(3) . 2_765 ? 
O52 Mo12 O53 103.3(3) . . ? 
O52 Mo12 O49 102.8(3) . . ? 
O53 Mo12 O49 101.8(3) . . ? 
O52 Mo12 O54 99.4(3) . . ? 
O53 Mo12 O54 99.6(3) . . ? 
O49 Mo12 O54 144.49(19) . . ? 
O52 Mo12 O50 95.1(2) . . ? 
O53 Mo12 O50 161.6(3) . . ? 
O49 Mo12 O50 73.28(17) . . ? 
O54 Mo12 O50 77.45(17) . . ? 
O52 Mo12 O51 163.3(2) . . ? 
O53 Mo12 O51 93.4(3) . . ? 
O49 Mo12 O51 73.28(18) . . ? 
O54 Mo12 O51 77.48(17) . . ? 
O50 Mo12 O51 68.12(13) . . ? 
O52 Mo12 Mo11 121.9(2) . . ? 
O53 Mo12 Mo11 120.3(2) . . ? 
O49 Mo12 Mo11 36.27(14) . . ? 
O54 Mo12 Mo11 108.21(13) . . ? 
O50 Mo12 Mo11 46.23(10) . . ? 
O51 Mo12 Mo11 46.25(10) . . ? 
O52 Mo12 K6 119.9(2) . . ? 
O53 Mo12 K6 42.8(2) . . ? 
O49 Mo12 K6 127.55(19) . . ? 
O54 Mo12 K6 58.98(17) . . ? 
O50 Mo12 K6 126.35(16) . . ? 
O51 Mo12 K6 72.87(16) . . ? 
Mo11 Mo12 K6 118.13(13) . . ? 
O55 P1 O14 111.6(2) . . ? 
O55 P1 O6 113.2(2) . . ? 
O14 P1 O6 111.2(2) . . ? 
O55 P1 C1 110.0(2) . . ? 
O14 P1 C1 109.6(2) . . ? 
O6 P1 C1 100.6(2) . . ? 
O55 P1 K5 39.9(2) . . ? 
O14 P1 K5 143.45(18) . . ? 
O6 P1 K5 103.26(18) . . ? 
C1 P1 K5 74.56(19) . . ? 
O56 P2 O13 113.2(2) . . ? 
O56 P2 O5 110.8(2) . . ? 
O13 P2 O5 111.4(2) . . ? 
O56 P2 C1 110.7(2) . . ? 
O13 P2 C1 109.3(2) . . ? 
O5 P2 C1 100.7(2) . . ? 
O57 P3 O18 112.8(2) . . ? 
O57 P3 O23 111.5(2) . . ? 
O18 P3 O23 111.8(2) . . ? 
O57 P3 C13 110.2(2) . . ? 
O18 P3 C13 109.6(2) . . ? 
O23 P3 C13 100.1(2) . . ? 
O57 P3 K2 11.83(15) . . ? 
O18 P3 K2 122.31(14) . . ? 
O23 P3 K2 110.73(15) . . ? 
C13 P3 K2 99.21(16) . . ? 
O58 P4 O19 114.5(2) . . ? 
O58 P4 O24 110.6(2) . . ? 
O19 P4 O24 111.4(2) . . ? 
O58 P4 C13 109.3(2) . . ? 
O19 P4 C13 109.8(2) . . ? 
O24 P4 C13 100.3(2) . . ? 
O58 P4 K3 31.28(17) . 1_455 ? 
O19 P4 K3 87.86(16) . 1_455 ? 
O24 P4 K3 109.07(16) . 1_455 ? 
C13 P4 K3 137.29(18) . 1_455 ? 
O59 P5 O40 112.2(2) . . ? 
O59 P5 O33 113.3(2) . . ? 
O40 P5 O33 110.7(2) . . ? 
O59 P5 C25 110.5(2) . . ? 
O40 P5 C25 109.3(2) . . ? 
O33 P5 C25 100.1(2) . . ? 
O60 P6 O41 111.4(2) . . ? 
O60 P6 O32 111.6(2) . . ? 
O41 P6 O32 112.6(2) . . ? 
O60 P6 C25 110.7(2) . . ? 
O41 P6 C25 109.7(2) . . ? 
O32 P6 C25 100.3(2) . . ? 
O61 P7 O46 113.4(2) . . ? 
O61 P7 O50 110.9(2) . . ? 
O46 P7 O50 112.3(2) . . ? 
O61 P7 C37 109.4(3) . . ? 
O46 P7 C37 109.8(2) . . ? 
O50 P7 C37 100.4(2) . . ? 
O61 P7 K3 35.01(19) . . ? 
O46 P7 K3 85.48(17) . . ? 
O50 P7 K3 144.58(17) . . ? 
C37 P7 K3 101.8(2) . . ? 
O62 P8 O45 113.2(2) . . ? 
O62 P8 O51 111.8(2) . . ? 
O45 P8 O51 111.5(2) . . ? 
O62 P8 C37 111.3(3) . . ? 
O45 P8 C37 108.5(2) . . ? 
O51 P8 C37 99.7(2) . . ? 
O62 P8 K6 43.4(2) . . ? 
O45 P8 K6 156.6(2) . . ? 
O51 P8 K6 84.0(2) . . ? 
C37 P8 K6 84.8(2) . . ? 
O62 P8 K2 8.69(19) . . ? 
O45 P8 K2 107.64(16) . . ? 
O51 P8 K2 120.48(16) . . ? 
C37 P8 K2 108.26(18) . . ? 
K6 P8 K2 49.11(16) . . ? 
Mo1 O3 Mo2 111.3(2) . . ? 
C1 O4 Mo1 120.2(3) . . ? 
C1 O4 K5 96.7(3) . . ? 
Mo1 O4 K5 115.5(2) . . ? 
P2 O5 Mo2 130.2(2) . . ? 
P2 O5 Mo1 112.2(2) . . ? 
Mo2 O5 Mo1 88.12(14) . . ? 
P1 O6 Mo2 128.3(2) . . ? 
P1 O6 Mo1 112.2(2) . . ? 
Mo2 O6 Mo1 84.81(13) . . ? 
Mo2 O8 K4 132.5(3) . 1_455 ? 
Mo2 O9 Mo3 157.9(2) . . ? 
Mo3 O11 K1 154.3(2) . 1_455 ? 
Mo4 O12 Mo3 145.8(2) . . ? 
P2 O13 Mo3 137.0(2) . . ? 
P1 O14 Mo3 135.1(2) . . ? 
Mo5 O17 Mo4 157.2(2) . . ? 
P3 O18 Mo4 135.1(2) . . ? 
P4 O19 Mo4 136.8(2) . . ? 
Mo5 O20 Na2 131.4(4) . 1_554 ? 
Mo6 O22 Mo5 110.4(2) . . ? 
P3 O23 Mo5 129.6(2) . . ? 
P3 O23 Mo6 113.1(2) . . ? 
Mo5 O23 Mo6 85.66(13) . . ? 
P4 O24 Mo6 113.54(19) . . ? 
P4 O24 Mo5 127.9(2) . . ? 
Mo6 O24 Mo5 86.24(13) . . ? 
C13 O27 Mo6 119.3(3) . . ? 
Mo7 O29 K4 146.2(3) . . ? 
Mo7 O30 Mo8 110.7(2) . . ? 
C25 O31 Mo7 118.9(3) . . ? 
P6 O32 Mo8 129.6(2) . . ? 
P6 O32 Mo7 112.9(2) . . ? 
Mo8 O32 Mo7 86.54(15) . . ? 
P5 O33 Mo7 113.9(2) . . ? 
P5 O33 Mo8 128.1(2) . . ? 
Mo7 O33 Mo8 85.97(13) . . ? 
Mo8 O35 K5 109.9(3) . . ? 
Mo8 O36 Mo9 158.4(2) . . ? 
Mo8 O36 K5 92.12(19) . . ? 
Mo9 O36 K5 98.76(18) . . ? 
Mo9 O38 K5 117.0(2) . . ? 
Mo9 O39 Mo10 142.5(2) . . ? 
P5 O40 Mo9 137.0(2) . . ? 
P6 O41 Mo9 134.2(2) . . ? 
Mo11 O44 Mo10 156.4(2) . . ? 
P8 O45 Mo10 139.0(2) . . ? 
P7 O46 Mo10 133.2(2) . . ? 
Mo11 O47 K1 102.6(2) . 2_765 ? 
Mo11 O48 K1 99.3(2) . 2_765 ? 
Mo12 O49 Mo11 110.6(2) . . ? 
P7 O50 Mo11 129.8(2) . . ? 
P7 O50 Mo12 112.6(2) . . ? 
Mo11 O50 Mo12 86.47(13) . . ? 
P8 O51 Mo11 129.5(2) . . ? 
P8 O51 Mo12 113.2(2) . . ? 
Mo11 O51 Mo12 86.14(14) . . ? 
Mo12 O53 K6 112.8(3) . . ? 
C37 O54 Mo12 120.6(4) . . ? 
C37 O54 K6 108.4(4) . . ? 
Mo12 O54 K6 90.7(2) . . ? 
P1 O55 K5 119.6(3) . . ? 
P3 O57 K2 160.4(3) . . ? 
P4 O58 K3 131.9(2) . 1_455 ? 
P5 O59 K1 149.4(3) . . ? 
P7 O61 K3 125.8(3) . . ? 
P8 O62 K2 165.7(3) . . ? 
P8 O62 K6 115.2(3) . . ? 
K2 O62 K6 73.9(2) . . ? 
O4 C1 C2 108.5(4) . . ? 
O4 C1 P2 102.9(3) . . ? 
C2 C1 P2 114.8(4) . . ? 
O4 C1 P1 103.4(3) . . ? 
C2 C1 P1 115.9(3) . . ? 
P2 C1 P1 109.8(3) . . ? 
C1 C2 C3 114.0(4) . . ? 
C1 C2 H2A 108.7 . . ? 
C3 C2 H2A 108.7 . . ? 
C1 C2 H2B 108.7 . . ? 
C3 C2 H2B 108.7 . . ? 
H2A C2 H2B 107.6 . . ? 
C4 C3 C2 111.5(4) . . ? 
C4 C3 H3A 109.3 . . ? 
C2 C3 H3A 109.3 . . ? 
C4 C3 H3B 109.3 . . ? 
C2 C3 H3B 109.3 . . ? 
H3A C3 H3B 108.0 . . ? 
N5 C4 C3 109.3(4) . . ? 
N5 C4 H4A 109.8 . . ? 
C3 C4 H4A 109.8 . . ? 
N5 C4 H4B 109.8 . . ? 
C3 C4 H4B 109.8 . . ? 
H4A C4 H4B 108.3 . . ? 
C6 N5 C4 113.1(4) . . ? 
C6 N5 H5A 109.0 . . ? 
C4 N5 H5A 109.0 . . ? 
C6 N5 H5B 109.0 . . ? 
C4 N5 H5B 109.0 . . ? 
H5A N5 H5B 107.8 . . ? 
N5 C6 C7 110.3(4) . . ? 
N5 C6 H6A 109.6 . . ? 
C7 C6 H6A 109.6 . . ? 
N5 C6 H6B 109.6 . . ? 
C7 C6 H6B 109.6 . . ? 
H6A C6 H6B 108.1 . . ? 
C12 C7 C8 119.3(5) . . ? 
C12 C7 C6 121.4(5) . . ? 
C8 C7 C6 119.3(5) . . ? 
C9 C8 C7 118.7(6) . . ? 
C9 C8 H8 120.7 . . ? 
C7 C8 H8 120.7 . . ? 
N10 C9 C8 120.4(6) . . ? 
N10 C9 H9 119.8 . . ? 
C8 C9 H9 119.8 . . ? 
C9 N10 C11 122.7(5) . . ? 
C9 N10 H10 118.6 . . ? 
C11 N10 H10 118.6 . . ? 
N10 C11 C12 119.9(6) . . ? 
N10 C11 H11 120.0 . . ? 
C12 C11 H11 120.0 . . ? 
C7 C12 C11 119.0(6) . . ? 
C7 C12 H12 120.5 . . ? 
C11 C12 H12 120.5 . . ? 
O27 C13 C14 108.4(4) . . ? 
O27 C13 P3 102.6(3) . . ? 
C14 C13 P3 115.4(4) . . ? 
O27 C13 P4 104.6(3) . . ? 
C14 C13 P4 114.9(4) . . ? 
P3 C13 P4 109.6(3) . . ? 
C13 C14 C15 113.6(4) . . ? 
C13 C14 H14A 108.8 . . ? 
C15 C14 H14A 108.8 . . ? 
C13 C14 H14B 108.8 . . ? 
C15 C14 H14B 108.8 . . ? 
H14A C14 H14B 107.7 . . ? 
C16 C15 C14 111.4(5) . . ? 
C16 C15 H15A 109.3 . . ? 
C14 C15 H15A 109.3 . . ? 
C16 C15 H15B 109.3 . . ? 
C14 C15 H15B 109.3 . . ? 
H15A C15 H15B 108.0 . . ? 
N17 C16 C15 109.2(5) . . ? 
N17 C16 H16A 109.8 . . ? 
C15 C16 H16A 109.8 . . ? 
N17 C16 H16B 109.8 . . ? 
C15 C16 H16B 109.8 . . ? 
H16A C16 H16B 108.3 . . ? 
C18 N17 C16 114.4(5) . . ? 
C18 N17 H17A 108.7 . . ? 
C16 N17 H17A 108.7 . . ? 
C18 N17 H17B 108.7 . . ? 
C16 N17 H17B 108.7 . . ? 
H17A N17 H17B 107.6 . . ? 
N17 C18 C19 113.1(5) . . ? 
N17 C18 H18A 109.0 . . ? 
C19 C18 H18A 109.0 . . ? 
N17 C18 H18B 109.0 . . ? 
C19 C18 H18B 109.0 . . ? 
H18A C18 H18B 107.8 . . ? 
C20 C19 C24 118.4(7) . . ? 
C20 C19 C18 123.4(6) . . ? 
C24 C19 C18 118.1(7) . . ? 
C21 C20 C19 119.2(6) . . ? 
C21 C20 H20 120.4 . . ? 
C19 C20 H20 120.4 . . ? 
N22 C21 C20 119.8(8) . . ? 
N22 C21 H21 120.1 . . ? 
C20 C21 H21 120.1 . . ? 
C23 N22 C21 122.3(7) . . ? 
C23 N22 H22 118.8 . . ? 
C21 N22 H22 118.8 . . ? 
N22 C23 C24 120.4(7) . . ? 
N22 C23 H23 119.8 . . ? 
C24 C23 H23 119.8 . . ? 
C23 C24 C19 119.9(8) . . ? 
C23 C24 H24 120.1 . . ? 
C19 C24 H24 120.1 . . ? 
O31 C25 C26 108.0(4) . . ? 
O31 C25 P5 104.0(3) . . ? 
C26 C25 P5 115.9(4) . . ? 
O31 C25 P6 103.1(3) . . ? 
C26 C25 P6 114.8(4) . . ? 
P5 C25 P6 109.6(3) . . ? 
C27 C26 C25 113.5(4) . . ? 
C27 C26 H26A 108.9 . . ? 
C25 C26 H26A 108.9 . . ? 
C27 C26 H26B 108.9 . . ? 
C25 C26 H26B 108.9 . . ? 
H26A C26 H26B 107.7 . . ? 
C28 C27 C26 111.2(4) . . ? 
C28 C27 H27A 109.4 . . ? 
C26 C27 H27A 109.4 . . ? 
C28 C27 H27B 109.4 . . ? 
C26 C27 H27B 109.4 . . ? 
H27A C27 H27B 108.0 . . ? 
N29 C28 C27 107.7(4) . . ? 
N29 C28 K3 102.5(3) . . ? 
C27 C28 K3 103.7(4) . . ? 
N29 C28 H28A 110.2 . . ? 
C27 C28 H28A 110.2 . . ? 
K3 C28 H28A 121.7 . . ? 
N29 C28 H28B 110.2 . . ? 
C27 C28 H28B 110.2 . . ? 
K3 C28 H28B 13.2 . . ? 
H28A C28 H28B 108.5 . . ? 
C28 N29 C30 113.7(4) . . ? 
C28 N29 H29A 108.8 . . ? 
C30 N29 H29A 108.8 . . ? 
C28 N29 H29B 108.8 . . ? 
C30 N29 H29B 108.8 . . ? 
H29A N29 H29B 107.7 . . ? 
N29 C30 C31 109.6(4) . . ? 
N29 C30 H30A 109.7 . . ? 
C31 C30 H30A 109.7 . . ? 
N29 C30 H30B 109.7 . . ? 
C31 C30 H30B 109.7 . . ? 
H30A C30 H30B 108.2 . . ? 
C32 C31 C36 118.8(5) . . ? 
C32 C31 C30 119.7(5) . . ? 
C36 C31 C30 121.4(5) . . ? 
C33 C32 C31 119.2(5) . . ? 
C33 C32 H32 120.4 . . ? 
C31 C32 H32 120.4 . . ? 
N34 C33 C32 120.2(5) . . ? 
N34 C33 H33 119.9 . . ? 
C32 C33 H33 119.9 . . ? 
C35 N34 C33 122.4(5) . . ? 
C35 N34 H34 118.8 . . ? 
C33 N34 H34 118.8 . . ? 
N34 C35 C36 120.3(5) . . ? 
N34 C35 H35 119.9 . . ? 
C36 C35 H35 119.9 . . ? 
C35 C36 C31 119.0(5) . . ? 
C35 C36 H36 120.5 . . ? 
C31 C36 H36 120.5 . . ? 
O54 C37 C38 108.5(4) . . ? 
O54 C37 P7 102.7(4) . . ? 
C38 C37 P7 115.2(4) . . ? 
O54 C37 P8 104.1(4) . . ? 
C38 C37 P8 115.7(4) . . ? 
P7 C37 P8 109.3(3) . . ? 
C39 C38 C37 114.4(5) . . ? 
C39 C38 H38A 108.7 . . ? 
C37 C38 H38A 108.7 . . ? 
C39 C38 H38B 108.7 . . ? 
C37 C38 H38B 108.7 . . ? 
H38A C38 H38B 107.6 . . ? 
C38 C39 C40 111.2(5) . . ? 
C38 C39 H39A 109.4 . . ? 
C40 C39 H39A 109.4 . . ? 
C38 C39 H39B 109.4 . . ? 
C40 C39 H39B 109.4 . . ? 
H39A C39 H39B 108.0 . . ? 
N41 C40 C39 109.0(5) . . ? 
N41 C40 H40A 109.9 . . ? 
C39 C40 H40A 109.9 . . ? 
N41 C40 H40B 109.9 . . ? 
C39 C40 H40B 109.9 . . ? 
H40A C40 H40B 108.3 . . ? 
C42 N41 C40 113.9(5) . . ? 
C42 N41 H41A 108.8 . . ? 
C40 N41 H41A 108.8 . . ? 
C42 N41 H41B 108.8 . . ? 
C40 N41 H41B 108.8 . . ? 
H41A N41 H41B 107.7 . . ? 
N41 C42 C43 112.7(5) . . ? 
N41 C42 H42A 109.0 . . ? 
C43 C42 H42A 109.0 . . ? 
N41 C42 H42B 109.0 . . ? 
C43 C42 H42B 109.0 . . ? 
H42A C42 H42B 107.8 . . ? 
C44 C43 C48 117.8(7) . . ? 
C44 C43 C42 125.1(5) . . ? 
C48 C43 C42 117.0(6) . . ? 
C43 C44 C45 120.3(6) . . ? 
C43 C44 H44 119.8 . . ? 
C45 C44 H44 119.8 . . ? 
N46 C45 C44 119.7(7) . . ? 
N46 C45 H45 120.2 . . ? 
C44 C45 H45 120.2 . . ? 
C45 N46 C47 121.9(7) . . ? 
C45 N46 H46 119.1 . . ? 
C47 N46 H46 119.1 . . ? 
N46 C47 C48 120.8(7) . . ? 
N46 C47 H47 119.6 . . ? 
C48 C47 H47 119.6 . . ? 
C47 C48 C43 119.4(8) . . ? 
C47 C48 H48 120.3 . . ? 
C43 C48 H48 120.3 . . ? 
O59 K1 O11 116.74(13) . 1_655 ? 
O59 K1 O9W 75.53(13) . . ? 
O11 K1 O9W 70.43(13) 1_655 . ? 
O59 K1 O47 83.63(13) . 2_765 ? 
O11 K1 O47 138.75(13) 1_655 2_765 ? 
O9W K1 O47 150.46(15) . 2_765 ? 
O59 K1 O15W 144.6(2) . . ? 
O11 K1 O15W 64.1(2) 1_655 . ? 
O9W K1 O15W 71.87(19) . . ? 
O47 K1 O15W 120.1(2) 2_765 . ? 
O59 K1 O48 137.82(13) . 2_765 ? 
O11 K1 O48 97.59(13) 1_655 2_765 ? 
O9W K1 O48 142.84(14) . 2_765 ? 
O47 K1 O48 54.21(13) 2_765 2_765 ? 
O15W K1 O48 71.31(18) . 2_765 ? 
O59 K1 O7W 92.25(14) . . ? 
O11 K1 O7W 72.21(13) 1_655 . ? 
O9W K1 O7W 129.21(15) . . ? 
O47 K1 O7W 71.48(13) 2_765 . ? 
O15W K1 O7W 119.1(2) . . ? 
O48 K1 O7W 74.85(13) 2_765 . ? 
O59 K1 Mo11 110.43(10) . 2_765 ? 
O11 K1 Mo11 117.84(9) 1_655 2_765 ? 
O9W K1 Mo11 162.68(12) . 2_765 ? 
O47 K1 Mo11 27.09(9) 2_765 2_765 ? 
O15W K1 Mo11 97.38(16) . 2_765 ? 
O48 K1 Mo11 27.48(9) 2_765 2_765 ? 
O7W K1 Mo11 67.73(9) . 2_765 ? 
O59 K1 K4 80.23(12) . . ? 
O11 K1 K4 97.22(12) 1_655 . ? 
O9W K1 K4 33.89(14) . . ? 
O47 K1 K4 122.43(14) 2_765 . ? 
O15W K1 K4 65.0(2) . . ? 
O48 K1 K4 120.89(13) 2_765 . ? 
O7W K1 K4 162.76(14) . . ? 
Mo11 K1 K4 129.42(10) 2_765 . ? 
O57 K2 O3W 174.4(3) . . ? 
O57 K2 O62 95.73(16) . . ? 
O3W K2 O62 88.1(3) . . ? 
O57 K2 O1W 95.35(18) . . ? 
O3W K2 O1W 89.2(4) . . ? 
O62 K2 O1W 83.74(18) . . ? 
O57 K2 O12W 83.25(15) . 2_655 ? 
O3W K2 O12W 91.1(3) . 2_655 ? 
O62 K2 O12W 137.44(18) . 2_655 ? 
O1W K2 O12W 138.81(18) . 2_655 ? 
O57 K2 O2W 102.0(2) . . ? 
O3W K2 O2W 76.4(4) . . ? 
O62 K2 O2W 149.55(19) . . ? 
O1W K2 O2W 70.24(19) . . ? 
O12W K2 O2W 69.87(18) 2_655 . ? 
O57 K2 O34W 67.9(3) . . ? 
O3W K2 O34W 109.8(5) . . ? 
O62 K2 O34W 70.2(2) . . ? 
O1W K2 O34W 146.6(3) . . ? 
O12W K2 O34W 70.2(2) 2_655 . ? 
O2W K2 O34W 139.7(2) . . ? 
O57 K2 K6 116.36(18) . . ? 
O3W K2 K6 62.1(4) . . ? 
O62 K2 K6 60.54(18) . . ? 
O1W K2 K6 132.94(19) . . ? 
O12W K2 K6 81.76(18) 2_655 . ? 
O2W K2 K6 128.7(2) . . ? 
O34W K2 K6 48.8(3) . . ? 
O57 K2 P3 7.76(10) . . ? 
O3W K2 P3 166.8(2) . . ? 
O62 K2 P3 102.53(13) . . ? 
O1W K2 P3 99.68(13) . . ? 
O12W K2 P3 75.73(12) 2_655 . ? 
O2W K2 P3 97.34(17) . . ? 
O34W K2 P3 67.5(3) . . ? 
K6 K2 P3 116.32(14) . . ? 
O57 K2 P8 97.74(11) . . ? 
O3W K2 P8 86.4(2) . . ? 
O62 K2 P8 5.59(12) . . ? 
O1W K2 P8 78.38(13) . . ? 
O12W K2 P8 142.74(14) 2_655 . ? 
O2W K2 P8 144.11(15) . . ? 
O34W K2 P8 75.75(17) . . ? 
K6 K2 P8 64.33(13) . . ? 
P3 K2 P8 104.85(5) . . ? 
O57 K2 K3 141.48(13) . 2_755 ? 
O3W K2 K3 33.1(2) . 2_755 ? 
O62 K2 K3 116.02(14) . 2_755 ? 
O1W K2 K3 108.64(15) . 2_755 ? 
O12W K2 K3 58.78(13) 2_655 2_755 ? 
O2W K2 K3 61.16(17) . 2_755 ? 
O34W K2 K3 101.6(3) . 2_755 ? 
K6 K2 K3 67.65(14) . 2_755 ? 
P3 K2 K3 133.74(7) . 2_755 ? 
P8 K2 K3 116.00(7) . 2_755 ? 
O61 K3 O3W 91.2(4) . 2_755 ? 
O61 K3 O58 102.8(2) . 1_655 ? 
O3W K3 O58 99.5(2) 2_755 1_655 ? 
O61 K3 O8W 140.5(2) . . ? 
O3W K3 O8W 81.2(4) 2_755 . ? 
O58 K3 O8W 116.6(2) 1_655 . ? 
O61 K3 C28 88.21(19) . . ? 
O3W K3 C28 165.0(3) 2_755 . ? 
O58 K3 C28 95.20(18) 1_655 . ? 
O8W K3 C28 89.8(2) . . ? 
O61 K3 P7 19.21(10) . . ? 
O3W K3 P7 96.3(3) 2_755 . ? 
O58 K3 P7 119.80(18) 1_655 . ? 
O8W K3 P7 123.05(18) . . ? 
C28 K3 P7 78.52(13) . . ? 
O61 K3 P4 97.11(16) . 1_655 ? 
O3W K3 P4 115.8(2) 2_755 1_655 ? 
O58 K3 P4 16.86(9) 1_655 1_655 ? 
O8W K3 P4 121.1(2) . 1_655 ? 
C28 K3 P4 79.12(13) . 1_655 ? 
P7 K3 P4 111.02(12) . 1_655 ? 
O61 K3 K6 128.5(2) . 2_755 ? 
O3W K3 K6 41.9(4) 2_755 2_755 ? 
O58 K3 K6 104.6(2) 1_655 2_755 ? 
O8W K3 K6 41.2(2) . 2_755 ? 
C28 K3 K6 130.9(2) . 2_755 ? 
P7 K3 K6 124.52(16) . 2_755 ? 
P4 K3 K6 119.34(16) 1_655 2_755 ? 
O61 K3 K2 108.07(18) . 2_755 ? 
O3W K3 K2 27.79(17) 2_755 2_755 ? 
O58 K3 K2 74.43(13) 1_655 2_755 ? 
O8W K3 K2 82.27(18) . 2_755 ? 
C28 K3 K2 162.12(17) . 2_755 ? 
P7 K3 K2 119.21(13) . 2_755 ? 
P4 K3 K2 91.27(9) 1_655 2_755 ? 
K6 K3 K2 42.63(14) 2_755 2_755 ? 
O26W K4 O9W 161.6(4) . . ? 
O26W K4 O25W 78.1(4) . . ? 
O9W K4 O25W 91.5(3) . . ? 
O26W K4 O29 86.2(3) . . ? 
O9W K4 O29 76.1(2) . . ? 
O25W K4 O29 71.8(3) . . ? 
O26W K4 O8 117.8(3) . 1_655 ? 
O9W K4 O8 71.36(18) . 1_655 ? 
O25W K4 O8 69.8(3) . 1_655 ? 
O29 K4 O8 128.0(3) . 1_655 ? 
O26W K4 K1 149.8(4) . . ? 
O9W K4 K1 38.68(16) . . ? 
O25W K4 K1 130.1(3) . . ? 
O29 K4 K1 92.76(16) . . ? 
O8 K4 K1 86.32(14) 1_655 . ? 
O36W K5 O32W 118.9(6) . . ? 
O36W K5 O55 81.4(4) . . ? 
O32W K5 O55 62.0(3) . . ? 
O36W K5 O35 75.6(5) . . ? 
O32W K5 O35 156.9(4) . . ? 
O55 K5 O35 141.0(3) . . ? 
O36W K5 O33W 76.5(5) . . ? 
O32W K5 O33W 62.8(5) . . ? 
O55 K5 O33W 96.8(5) . . ? 
O35 K5 O33W 107.7(4) . . ? 
O36W K5 O38 171.0(5) . . ? 
O32W K5 O38 61.1(3) . . ? 
O55 K5 O38 105.3(2) . . ? 
O35 K5 O38 101.6(2) . . ? 
O33W K5 O38 96.5(4) . . ? 
O36W K5 O36 128.4(5) . . ? 
O32W K5 O36 112.4(4) . . ? 
O55 K5 O36 130.7(2) . . ? 
O35 K5 O36 53.99(17) . . ? 
O33W K5 O36 125.3(5) . . ? 
O38 K5 O36 51.36(14) . . ? 
O36W K5 O4 89.8(4) . . ? 
O32W K5 O4 111.2(4) . . ? 
O55 K5 O4 63.29(15) . . ? 
O35 K5 O4 85.3(2) . . ? 
O33W K5 O4 157.6(5) . . ? 
O38 K5 O4 98.6(2) . . ? 
O36 K5 O4 77.06(18) . . ? 
O36W K5 P1 84.3(4) . . ? 
O32W K5 P1 76.9(3) . . ? 
O55 K5 P1 20.41(10) . . ? 
O35 K5 P1 124.5(2) . . ? 
O33W K5 P1 117.0(4) . . ? 
O38 K5 P1 104.11(17) . . ? 
O36 K5 P1 113.7(2) . . ? 
O4 K5 P1 42.91(10) . . ? 
O36W K5 Mo8 99.7(5) . . ? 
O32W K5 Mo8 139.9(4) . . ? 
O55 K5 Mo8 140.5(2) . . ? 
O35 K5 Mo8 25.47(12) . . ? 
O33W K5 Mo8 122.0(4) . . ? 
O38 K5 Mo8 79.00(16) . . ? 
O36 K5 Mo8 28.87(9) . . ? 
O4 K5 Mo8 77.25(16) . . ? 
P1 K5 Mo8 120.14(19) . . ? 
O36W K5 Mo9 156.7(5) . . ? 
O32W K5 Mo9 83.1(3) . . ? 
O55 K5 Mo9 118.4(2) . . ? 
O35 K5 Mo9 81.12(17) . . ? 
O33W K5 Mo9 110.6(4) . . ? 
O38 K5 Mo9 22.03(9) . . ? 
O36 K5 Mo9 29.34(9) . . ? 
O4 K5 Mo9 88.95(17) . . ? 
P1 K5 Mo9 109.98(15) . . ? 
Mo8 K5 Mo9 57.36(9) . . ? 
O36W K5 Na1 28.6(4) . . ? 
O32W K5 Na1 90.4(4) . . ? 
O55 K5 Na1 62.6(2) . . ? 
O35 K5 Na1 103.4(2) . . ? 
O33W K5 Na1 61.1(4) . . ? 
O38 K5 Na1 150.6(3) . . ? 
O36 K5 Na1 157.0(2) . . ? 
O4 K5 Na1 98.7(2) . . ? 
P1 K5 Na1 73.78(17) . . ? 
Mo8 K5 Na1 128.2(2) . . ? 
Mo9 K5 Na1 171.3(2) . . ? 
O34W K6 O62 68.5(3) . . ? 
O34W K6 O53 98.1(4) . . ? 
O62 K6 O53 91.3(2) . . ? 
O34W K6 O8W 121.6(4) . 2_755 ? 
O62 K6 O8W 144.3(3) . 2_755 ? 
O53 K6 O8W 118.1(4) . 2_755 ? 
O34W K6 O3W 103.8(5) . . ? 
O62 K6 O3W 68.5(3) . . ? 
O53 K6 O3W 141.4(3) . . ? 
O8W K6 O3W 75.8(3) 2_755 . ? 
O34W K6 K2 59.8(3) . . ? 
O62 K6 K2 45.56(17) . . ? 
O53 K6 K2 135.2(3) . . ? 
O8W K6 K2 106.4(3) 2_755 . ? 
O3W K6 K2 45.0(2) . . ? 
O34W K6 O54 120.7(3) . . ? 
O62 K6 O54 62.53(18) . . ? 
O53 K6 O54 53.7(2) . . ? 
O8W K6 O54 117.6(3) 2_755 . ? 
O3W K6 O54 87.7(2) . . ? 
K2 K6 O54 101.7(2) . . ? 
O34W K6 P8 81.1(3) . . ? 
O62 K6 P8 21.34(11) . . ? 
O53 K6 P8 72.03(19) . . ? 
O8W K6 P8 150.3(3) 2_755 . ? 
O3W K6 P8 80.4(2) . . ? 
K2 K6 P8 66.56(15) . . ? 
O54 K6 P8 43.19(11) . . ? 
O34W K6 Mo12 105.4(3) . . ? 
O62 K6 Mo12 73.13(18) . . ? 
O53 K6 Mo12 24.36(13) . . ? 
O8W K6 Mo12 126.8(3) 2_755 . ? 
O3W K6 Mo12 117.6(3) . . ? 
K2 K6 Mo12 118.6(2) . . ? 
O54 K6 Mo12 30.33(11) . . ? 
P8 K6 Mo12 52.09(10) . . ? 
O34W K6 K3 110.6(4) . 2_755 ? 
O62 K6 K3 106.1(3) . 2_755 ? 
O53 K6 K3 150.3(3) . 2_755 ? 
O8W K6 K3 38.78(16) 2_755 2_755 ? 
O3W K6 K3 38.7(2) . 2_755 ? 
K2 K6 K3 69.72(18) . 2_755 ? 
O54 K6 K3 113.3(2) . 2_755 ? 
P8 K6 K3 119.0(2) . 2_755 ? 
Mo12 K6 K3 140.8(2) . 2_755 ? 
O17W Na1 O37W 166.5(7) . . ? 
O17W Na1 O22W 89.5(5) . . ? 
O37W Na1 O22W 91.0(5) . . ? 
O17W Na1 O36W 84.1(6) . . ? 
O37W Na1 O36W 109.3(7) . . ? 
O22W Na1 O36W 81.9(5) . . ? 
O17W Na1 K5 60.7(3) . . ? 
O37W Na1 K5 132.7(5) . . ? 
O22W Na1 K5 86.2(3) . . ? 
O36W Na1 K5 23.7(5) . . ? 
O35W Na2 O30W 161.7(11) . . ? 
O35W Na2 O19W 84.4(7) . . ? 
O30W Na2 O19W 81.9(7) . . ? 
O35W Na2 O20W 111.9(9) . 1_456 ? 
O30W Na2 O20W 85.7(7) . 1_456 ? 
O19W Na2 O20W 151.3(8) . 1_456 ? 
O35W Na2 O24W 91.5(9) . . ? 
O30W Na2 O24W 95.1(7) . . ? 
O19W Na2 O24W 69.4(6) . . ? 
O20W Na2 O24W 86.1(6) 1_456 . ? 
O35W Na2 O20 83.4(8) . 1_556 ? 
O30W Na2 O20 94.7(6) . 1_556 ? 
O19W Na2 O20 125.5(7) . 1_556 ? 
O20W Na2 O20 81.2(5) 1_456 1_556 ? 
O24W Na2 O20 163.3(8) . 1_556 ? 
K2 O3W K3 119.1(3) . 2_755 ? 
K2 O3W K6 73.0(4) . . ? 
K3 O3W K6 99.5(5) 2_755 . ? 
K3 O8W K6 100.0(3) . 2_755 ? 
K4 O9W K1 107.4(3) . . ? 
K6 O34W K2 71.3(5) . . ? 
K5 O36W Na1 127.7(8) . . ? 
  
_refine_diff_density_max    3.559 
_refine_diff_density_min   -2.535 
_refine_diff_density_rms    0.337 
  
#====================================================================
data_NH4Mo6(AlePy2Mo)2
  
_audit_creation_method            SHELXL-97 
_chemical_name_systematic 
; 
 ? 
; 
_chemical_name_common             ? 
_chemical_melting_point           ? 
_chemical_formula_moiety          ? 
_chemical_formula_sum 
 'C32 H102.50 Mo8 N14 O53.25 P4' 
_chemical_formula_weight          2427.18 
  
loop_ 
 _atom_type_symbol 
 _atom_type_description 
 _atom_type_scat_dispersion_real 
 _atom_type_scat_dispersion_imag 
 _atom_type_scat_source 
 'C'  'C'   0.0033   0.0016 
 'International Tables Vol C Tables 4.2.6.8 and 6.1.1.4' 
 'H'  'H'   0.0000   0.0000 
 'International Tables Vol C Tables 4.2.6.8 and 6.1.1.4' 
 'N'  'N'   0.0061   0.0033 
 'International Tables Vol C Tables 4.2.6.8 and 6.1.1.4' 
 'O'  'O'   0.0106   0.0060 
 'International Tables Vol C Tables 4.2.6.8 and 6.1.1.4' 
 'P'  'P'   0.1023   0.0942 
 'International Tables Vol C Tables 4.2.6.8 and 6.1.1.4' 
 'Mo'  'Mo'  -1.6832   0.6857 
 'International Tables Vol C Tables 4.2.6.8 and 6.1.1.4' 
  
_symmetry_cell_setting            Triclinic 
_symmetry_space_group_name_H-M    P-1 
  
loop_ 
 _symmetry_equiv_pos_as_xyz 
 'x, y, z' 
 '-x, -y, -z' 
  
_cell_length_a                    17.6023(19) 
_cell_length_b                    22.134(2) 
_cell_length_c                    28.323(3) 
_cell_angle_alpha                 97.443(5) 
_cell_angle_beta                  95.464(5) 
_cell_angle_gamma                 107.430(5) 
_cell_volume                      10333.9(19) 
_cell_formula_units_Z             4 
_cell_measurement_temperature     150(2) 
_cell_measurement_reflns_used     9812 
_cell_measurement_theta_min       2.45 
_cell_measurement_theta_max       29.32 
  
_exptl_crystal_description        parallelepiped 
_exptl_crystal_colour             orange 
_exptl_crystal_size_max           0.24 
_exptl_crystal_size_mid           0.18 
_exptl_crystal_size_min           0.08 
_exptl_crystal_density_meas       ? 
_exptl_crystal_density_diffrn     1.560 
_exptl_crystal_density_method     'not measured' 
_exptl_crystal_F_000              4858 
_exptl_absorpt_coefficient_mu     1.087 
_exptl_absorpt_correction_type    multi-scan
_exptl_absorpt_correction_T_min   0.7804 
_exptl_absorpt_correction_T_max   0.9181 
_exptl_absorpt_process_details    ? 
  
_exptl_special_details 
; 
 ? 
; 
  
_diffrn_ambient_temperature       150(2) 
_diffrn_radiation_wavelength      0.71073 
_diffrn_radiation_type            MoK\a 
_diffrn_radiation_source          'fine-focus sealed tube' 
_diffrn_radiation_monochromator   graphite 
_diffrn_measurement_device_type   'Bruker APEX-II CCD' 
_diffrn_measurement_method        '\f and \w scans' 
_diffrn_detector_area_resol_mean  ? 
_diffrn_standards_number          0 
_diffrn_standards_interval_count  ? 
_diffrn_standards_interval_time   ? 
_diffrn_standards_decay_%         ? 
_diffrn_reflns_number             428822 
_diffrn_reflns_av_R_equivalents   0.0467 
_diffrn_reflns_av_sigmaI/netI     0.0270 
_diffrn_reflns_limit_h_min        -20 
_diffrn_reflns_limit_h_max        20 
_diffrn_reflns_limit_k_min        -24 
_diffrn_reflns_limit_k_max        26 
_diffrn_reflns_limit_l_min        -33 
_diffrn_reflns_limit_l_max        33 
_diffrn_reflns_theta_min          0.73 
_diffrn_reflns_theta_max          25.00 
_reflns_number_total              36283 
_reflns_number_gt                 28875 
_reflns_threshold_expression      >2sigma(I) 
  
_computing_data_collection        'Bruker APEX2' 
_computing_cell_refinement        'Bruker SAINT' 
_computing_data_reduction         'Bruker SAINT' 
_computing_structure_solution     'SHELXS-97 (Sheldrick, 1990)' 
_computing_structure_refinement   'SHELXL-97 (Sheldrick, 1997)' 
_computing_molecular_graphics     'Bruker SHELXTL' 
_computing_publication_material   'Bruker SHELXTL' 
  
_refine_special_details 
; 
 Refinement of F^2^ against ALL reflections.  The weighted R-factor wR and 
 goodness of fit S are based on F^2^, conventional R-factors R are based 
 on F, with F set to zero for negative F^2^. The threshold expression of 
 F^2^ > 2sigma(F^2^) is used only for calculating R-factors(gt) etc. and is 
 not relevant to the choice of reflections for refinement.  R-factors based 
 on F^2^ are statistically about twice as large as those based on F, and R- 
 factors based on ALL data will be even larger. 
; 
  
_refine_ls_structure_factor_coef  Fsqd 
_refine_ls_matrix_type            full 
_refine_ls_weighting_scheme       calc 
_refine_ls_weighting_details 
 'calc w=1/[\s^2^(Fo^2^)+(0.1083P)^2^+261.6858P] where P=(Fo^2^+2Fc^2^)/3' 
_atom_sites_solution_primary      direct 
_atom_sites_solution_secondary    difmap 
_atom_sites_solution_hydrogens    geom 
_refine_ls_hydrogen_treatment     constr
_refine_ls_extinction_method      none 
_refine_ls_extinction_coef        ? 
_refine_ls_number_reflns          36283 
_refine_ls_number_parameters      2119 
_refine_ls_number_restraints      0 
_refine_ls_R_factor_all           0.1215 
_refine_ls_R_factor_gt            0.1051 
_refine_ls_wR_factor_ref          0.2820 
_refine_ls_wR_factor_gt           0.2719 
_refine_ls_goodness_of_fit_ref    1.035 
_refine_ls_restrained_S_all       1.035 
_refine_ls_shift/su_max           0.000 
_refine_ls_shift/su_mean          0.000 
  
loop_ 
 _atom_site_label 
 _atom_site_type_symbol 
 _atom_site_fract_x 
 _atom_site_fract_y 
 _atom_site_fract_z 
 _atom_site_U_iso_or_equiv 
 _atom_site_adp_type 
 _atom_site_occupancy 
 _atom_site_symmetry_multiplicity 
 _atom_site_calc_flag 
 _atom_site_refinement_flags 
 _atom_site_disorder_assembly 
 _atom_site_disorder_group 
Mo1 Mo 0.51018(6) 0.15758(5) 0.29085(3) 0.0347(2) Uani 1 1 d . . . 
Mo2 Mo 0.37325(6) 0.17613(5) 0.29068(3) 0.0352(2) Uani 1 1 d . . . 
Mo3 Mo 0.77518(9) 0.15299(10) 0.41247(5) 0.0781(5) Uani 1 1 d . . . 
Mo4 Mo 0.60346(8) 0.17255(8) 0.42172(4) 0.0598(4) Uani 1 1 d . . . 
Mo5 Mo 0.34148(9) 0.21183(10) 0.42203(4) 0.0769(5) Uani 1 1 d . . . 
Mo6 Mo 0.17039(11) 0.23650(12) 0.41450(4) 0.0963(7) Uani 1 1 d . . . 
Mo7 Mo 0.70687(5) 0.13079(5) 0.05846(3) 0.0338(2) Uani 1 1 d . . . 
Mo8 Mo 0.07130(5) 0.12924(4) 0.05846(3) 0.0260(2) Uani 1 1 d . . . 
Mo9 Mo 0.12484(6) 0.28357(5) 0.71712(3) 0.0368(2) Uani 1 1 d . . . 
Mo10 Mo -0.01289(6) 0.30051(5) 0.71644(3) 0.0367(2) Uani 1 1 d . . . 
Mo11 Mo 0.33399(9) 0.22022(9) 0.59856(5) 0.0721(4) Uani 1 1 d . . . 
Mo12 Mo 0.15696(9) 0.23443(9) 0.58737(4) 0.0673(4) Uani 1 1 d . . . 
Mo13 Mo -0.11040(8) 0.27302(8) 0.58509(4) 0.0585(4) Uani 1 1 d . . . 
Mo14 Mo -0.27786(10) 0.30089(9) 0.59303(4) 0.0751(5) Uani 1 1 d . . . 
Mo15 Mo 0.43184(5) 0.35453(5) 0.95156(3) 0.0322(2) Uani 1 1 d . . . 
Mo16 Mo -0.20571(5) 0.35756(4) 0.94948(3) 0.0281(2) Uani 1 1 d . . . 
P1 P 0.7092(2) 0.2178(2) 0.32654(11) 0.0532(9) Uani 1 1 d . . . 
P2 P 0.6349(2) 0.0753(2) 0.32089(12) 0.0530(9) Uani 1 1 d . . . 
P3 P 0.2701(3) 0.2756(2) 0.32530(13) 0.0597(11) Uani 1 1 d . . . 
P4 P 0.1890(2) 0.1342(2) 0.32403(11) 0.0473(8) Uani 1 1 d . . . 
P5 P 0.2382(2) 0.18875(19) 0.69105(13) 0.0500(8) Uani 1 1 d . . . 
P6 P 0.3073(2) 0.32823(19) 0.68128(12) 0.0482(8) Uani 1 1 d . . . 
P7 P -0.21345(19) 0.24011(18) 0.68323(11) 0.0421(7) Uani 1 1 d . . . 
P8 P -0.1359(3) 0.38160(19) 0.68159(12) 0.0545(9) Uani 1 1 d . . . 
O1 O 0.5081(4) 0.1438(4) 0.2297(2) 0.0357(17) Uani 1 1 d . . . 
O2 O 0.4055(5) 0.1013(4) 0.2994(3) 0.0407(19) Uani 1 1 d . . . 
O3 O 0.4831(6) 0.2358(4) 0.3012(3) 0.045(2) Uani 1 1 d . . . 
O4 O 0.6295(5) 0.2209(4) 0.3014(3) 0.0422(19) Uani 1 1 d . . . 
O5 O 0.5409(5) 0.1691(4) 0.3666(3) 0.043(2) Uani 1 1 d . . . 
O6 O 0.5548(5) 0.0782(4) 0.2959(3) 0.043(2) Uani 1 1 d . . . 
O7 O 0.3468(5) 0.1649(4) 0.2301(2) 0.0361(17) Uani 1 1 d . . . 
O8 O 0.3364(6) 0.2589(4) 0.2994(3) 0.052(2) Uani 1 1 d . . . 
O9 O 0.2554(5) 0.1195(4) 0.2979(3) 0.0410(19) Uani 1 1 d . . . 
O10 O 0.3773(6) 0.1938(5) 0.3673(3) 0.055(2) Uani 1 1 d . . . 
O11 O 0.7956(8) 0.0873(8) 0.4285(4) 0.102(5) Uani 1 1 d . . . 
O12 O 0.8628(8) 0.2158(8) 0.4316(4) 0.099(5) Uani 1 1 d . . . 
O13 O 0.7079(7) 0.1688(7) 0.4553(3) 0.078(4) Uani 1 1 d . . . 
O14 O 0.7855(5) 0.1389(6) 0.3430(3) 0.066(3) Uani 1 1 d . . . 
O15 O 0.7091(6) 0.2194(5) 0.3815(3) 0.060(3) Uani 1 1 d . . . 
O16 O 0.6436(6) 0.0912(6) 0.3763(3) 0.062(3) Uani 1 1 d . . . 
O17 O 0.5413(7) 0.1169(7) 0.4500(4) 0.082(4) Uani 1 1 d . . . 
O18 O 0.6090(7) 0.2471(7) 0.4537(4) 0.086(4) Uani 1 1 d . . . 
O19 O 0.3462(7) 0.1495(8) 0.4505(4) 0.094(5) Uani 1 1 d . . . 
O20 O 0.4201(8) 0.2766(9) 0.4531(4) 0.114(6) Uani 1 1 d . . . 
O21 O 0.2553(7) 0.2330(8) 0.4561(3) 0.098(5) Uani 1 1 d . . . 
O22 O 0.2146(6) 0.1528(6) 0.3788(3) 0.066(3) Uani 1 1 d . . . 
O23 O 0.2854(7) 0.2786(6) 0.3804(3) 0.076(4) Uani 1 1 d . . . 
O24 O 0.0902(8) 0.1861(10) 0.4325(4) 0.125(7) Uani 1 1 d . . . 
O25 O 0.1686(11) 0.3153(9) 0.4326(5) 0.127(7) Uani 1 1 d . . . 
O26 O 0.1284(7) 0.2265(6) 0.3459(3) 0.069(3) Uani 1 1 d . . . 
O27 O 0.7080(5) 0.0545(4) 0.0669(3) 0.042(2) Uani 1 1 d . . . 
O28 O 0.7987(4) 0.1818(4) 0.0902(3) 0.046(2) Uani 1 1 d . . . 
O29 O 0.7101(5) 0.1355(4) -0.0024(3) 0.0376(18) Uani 1 1 d . . . 
O30 O 0.0697(5) 0.2062(4) 0.0714(3) 0.0378(18) Uani 1 1 d . . . 
O31 O -0.0026(4) 0.0821(4) 0.0875(2) 0.0296(15) Uani 1 1 d . . . 
O32 O 0.0389(4) 0.1040(4) -0.0033(2) 0.0322(16) Uani 1 1 d . . . 
O33 O 0.1521(4) 0.2994(4) 0.7782(3) 0.0395(19) Uani 1 1 d . . . 
O34 O 0.0184(5) 0.2230(4) 0.7084(3) 0.0383(18) Uani 1 1 d . . . 
O35 O 0.0887(5) 0.3559(4) 0.7047(3) 0.046(2) Uani 1 1 d . . . 
O36 O 0.2391(5) 0.3425(4) 0.7063(3) 0.047(2) Uani 1 1 d . . . 
O37 O 0.1203(5) 0.2577(5) 0.6411(3) 0.050(2) Uani 1 1 d . . . 
O38 O 0.1692(5) 0.2026(4) 0.7141(3) 0.0423(19) Uani 1 1 d . . . 
O39 O -0.0103(4) 0.3174(4) 0.7773(2) 0.0359(17) Uani 1 1 d . . . 
O40 O -0.0564(6) 0.3783(4) 0.7070(3) 0.050(2) Uani 1 1 d . . . 
O41 O -0.1329(5) 0.2390(4) 0.7088(3) 0.0387(18) Uani 1 1 d . . . 
O42 O -0.0474(5) 0.2818(4) 0.6395(3) 0.042(2) Uani 1 1 d . . . 
O43 O 0.4111(8) 0.2709(7) 0.5778(4) 0.091(4) Uani 1 1 d . . . 
O44 O 0.3493(9) 0.1474(7) 0.5852(5) 0.104(5) Uani 1 1 d . . . 
O45 O 0.2451(7) 0.2129(7) 0.5546(3) 0.082(4) Uani 1 1 d . . . 
O46 O 0.3770(6) 0.2411(5) 0.6675(3) 0.060(3) Uani 1 1 d . . . 
O47 O 0.2201(6) 0.1780(5) 0.6349(3) 0.056(2) Uani 1 1 d . . . 
O48 O 0.2807(6) 0.3015(5) 0.6260(3) 0.059(3) Uani 1 1 d . . . 
O49 O 0.0836(8) 0.1676(8) 0.5616(4) 0.099(5) Uani 1 1 d . . . 
O50 O 0.1440(8) 0.2897(8) 0.5511(3) 0.100(5) Uani 1 1 d . . . 
O51 O -0.0488(9) 0.3219(7) 0.5530(4) 0.087(4) Uani 1 1 d . . . 
O52 O -0.1199(7) 0.1954(7) 0.5568(3) 0.079(4) Uani 1 1 d . . . 
O53 O -0.2135(7) 0.2761(6) 0.5503(3) 0.068(3) Uani 1 1 d . . . 
O54 O -0.2155(5) 0.2326(5) 0.6283(3) 0.048(2) Uani 1 1 d . . . 
O55 O -0.1449(7) 0.3597(5) 0.6266(3) 0.064(3) Uani 1 1 d . . . 
O56 O -0.2971(10) 0.3656(8) 0.5711(4) 0.113(6) Uani 1 1 d . . . 
O57 O -0.3667(7) 0.2405(8) 0.5763(4) 0.093(4) Uani 1 1 d . . . 
O58 O -0.2878(6) 0.3197(5) 0.6617(3) 0.062(3) Uani 1 1 d . . . 
O59 O 0.5081(5) 0.3937(5) 0.9206(3) 0.048(2) Uani 1 1 d . . . 
O60 O 0.4638(5) 0.3801(4) 1.0132(3) 0.0406(19) Uani 1 1 d . . . 
O61 O 0.4273(5) 0.2746(4) 0.9404(3) 0.046(2) Uani 1 1 d . . . 
O62 O -0.2071(4) 0.3630(4) 1.0115(3) 0.0382(18) Uani 1 1 d . . . 
O63 O -0.2144(5) 0.4292(4) 0.9340(3) 0.0406(19) Uani 1 1 d . . . 
O64 O -0.2936(4) 0.2964(4) 0.9213(3) 0.0339(17) Uani 1 1 d . . . 
O65 O 0.7795(6) 0.2718(6) 0.3160(4) 0.078(3) Uani 1 1 d . . . 
O66 O 0.6499(7) 0.0150(6) 0.3050(4) 0.078(3) Uani 1 1 d . . . 
O67 O 0.2594(8) 0.3367(5) 0.3136(4) 0.078(3) Uani 1 1 d . . . 
O68 O 0.1113(6) 0.0823(6) 0.3105(4) 0.067(3) Uani 1 1 d . . . 
O69 O 0.2609(7) 0.1342(5) 0.7089(4) 0.066(3) Uani 1 1 d . . . 
O80 O 0.3815(6) 0.3846(6) 0.6915(4) 0.069(3) Uani 1 1 d . . . 
O81 O -0.2842(5) 0.1906(5) 0.6965(3) 0.055(2) Uani 1 1 d . . . 
O82 O -0.1432(8) 0.4469(6) 0.6941(4) 0.083(4) Uani 1 1 d . . . 
C1 C 0.7221(8) 0.1404(8) 0.3086(4) 0.052(3) Uani 1 1 d . . . 
C2 C 0.7442(8) 0.1291(9) 0.2584(4) 0.061(4) Uani 1 1 d . . . 
H2A H 0.7549 0.0875 0.2534 0.073 Uiso 1 1 calc R . . 
H2B H 0.7945 0.1631 0.2561 0.073 Uiso 1 1 calc R . . 
C3 C 0.6785(7) 0.1285(8) 0.2178(4) 0.054(4) Uani 1 1 d . . . 
H3A H 0.6305 0.0907 0.2167 0.065 Uiso 1 1 calc R . . 
H3B H 0.6625 0.1676 0.2246 0.065 Uiso 1 1 calc R . . 
C4 C 0.7092(7) 0.1258(8) 0.1690(4) 0.056(4) Uani 1 1 d . . . 
H4A H 0.7626 0.1587 0.1718 0.067 Uiso 1 1 calc R . . 
H4B H 0.7155 0.0832 0.1594 0.067 Uiso 1 1 calc R . . 
N5 N 0.6516(5) 0.1376(5) 0.1309(3) 0.036(2) Uani 1 1 d . . . 
C6 C 0.5737(6) 0.0870(6) 0.1242(4) 0.040(3) Uani 1 1 d . . . 
H6A H 0.5424 0.0969 0.1497 0.048 Uiso 1 1 calc R . . 
H6B H 0.5829 0.0457 0.1278 0.048 Uiso 1 1 calc R . . 
C7 C 0.5256(7) 0.0795(6) 0.0762(4) 0.036(3) Uani 1 1 d . . . 
C8 C 0.4432(7) 0.0614(6) 0.0689(4) 0.042(3) Uani 1 1 d . . . 
H8 H 0.4136 0.0539 0.0951 0.050 Uiso 1 1 calc R . . 
C9 C 0.4031(7) 0.0541(6) 0.0222(4) 0.042(3) Uani 1 1 d . . . 
H9 H 0.3460 0.0410 0.0162 0.050 Uiso 1 1 calc R . . 
C10 C 0.4481(7) 0.0664(6) -0.0148(4) 0.042(3) Uani 1 1 d . . . 
H10 H 0.4224 0.0629 -0.0465 0.050 Uiso 1 1 calc R . . 
C11 C 0.5300(6) 0.0837(5) -0.0053(4) 0.033(2) Uani 1 1 d . . . 
H11 H 0.5603 0.0891 -0.0313 0.040 Uiso 1 1 calc R . . 
N12 N 0.5694(5) 0.0933(4) 0.0396(3) 0.0300(19) Uani 1 1 d . . . 
C13 C 0.6429(8) 0.2026(7) 0.1434(5) 0.054(3) Uani 1 1 d . . . 
H13A H 0.5996 0.1993 0.1637 0.065 Uiso 1 1 calc R . . 
H13B H 0.6935 0.2315 0.1628 0.065 Uiso 1 1 calc R . . 
C14 C 0.6241(7) 0.2323(6) 0.1014(4) 0.042(3) Uani 1 1 d . . . 
C15 C 0.5815(7) 0.2765(7) 0.1021(5) 0.054(4) Uani 1 1 d . . . 
H15 H 0.5588 0.2869 0.1299 0.065 Uiso 1 1 calc R . . 
C16 C 0.5728(9) 0.3046(8) 0.0623(6) 0.066(4) Uani 1 1 d . . . 
H16 H 0.5432 0.3341 0.0625 0.079 Uiso 1 1 calc R . . 
C17 C 0.6066(8) 0.2902(6) 0.0222(5) 0.050(3) Uani 1 1 d . . . 
H17 H 0.6018 0.3099 -0.0054 0.060 Uiso 1 1 calc R . . 
C18 C 0.6482(7) 0.2457(6) 0.0236(5) 0.042(3) Uani 1 1 d . . . 
H18 H 0.6716 0.2350 -0.0039 0.051 Uiso 1 1 calc R . . 
N19 N 0.6564(5) 0.2177(5) 0.0612(4) 0.037(2) Uani 1 1 d . . . 
C20 C 0.1762(8) 0.2118(7) 0.3104(4) 0.053(4) Uani 1 1 d . . . 
C21 C 0.1301(8) 0.2053(8) 0.2601(4) 0.052(4) Uani 1 1 d . . . 
H21A H 0.0779 0.1708 0.2566 0.062 Uiso 1 1 calc R . . 
H21B H 0.1188 0.2459 0.2571 0.062 Uiso 1 1 calc R . . 
C22 C 0.1756(7) 0.1902(6) 0.2203(4) 0.039(3) Uani 1 1 d . . . 
H22A H 0.1928 0.1526 0.2252 0.046 Uiso 1 1 calc R . . 
H22B H 0.2244 0.2272 0.2208 0.046 Uiso 1 1 calc R . . 
C23 C 0.1228(6) 0.1759(6) 0.1713(4) 0.036(3) Uani 1 1 d . . . 
H23A H 0.1126 0.2158 0.1645 0.043 Uiso 1 1 calc R . . 
H23B H 0.0703 0.1439 0.1728 0.043 Uiso 1 1 calc R . . 
N24 N 0.1612(5) 0.1502(5) 0.1300(3) 0.032(2) Uani 1 1 d . . . 
C25 C 0.1779(7) 0.0896(5) 0.1390(4) 0.035(2) Uani 1 1 d . . . 
H25A H 0.2311 0.1012 0.1589 0.042 Uiso 1 1 calc R . . 
H25B H 0.1369 0.0663 0.1575 0.042 Uiso 1 1 calc R . . 
C26 C 0.1773(6) 0.0466(5) 0.0948(4) 0.028(2) Uani 1 1 d . . . 
C27 C 0.2208(7) 0.0029(6) 0.0951(5) 0.042(3) Uani 1 1 d . . . 
H27 H 0.2557 0.0030 0.1228 0.050 Uiso 1 1 calc R . . 
C28 C 0.2109(7) -0.0410(6) 0.0529(5) 0.044(3) Uani 1 1 d . . . 
H28 H 0.2379 -0.0723 0.0516 0.052 Uiso 1 1 calc R . . 
C29 C 0.1617(6) -0.0379(5) 0.0138(4) 0.032(2) Uani 1 1 d . . . 
H29 H 0.1550 -0.0670 -0.0153 0.039 Uiso 1 1 calc R . . 
C30 C 0.1223(6) 0.0063(5) 0.0157(4) 0.030(2) Uani 1 1 d . . . 
H30 H 0.0890 0.0078 -0.0124 0.036 Uiso 1 1 calc R . . 
N31 N 0.1287(5) 0.0484(4) 0.0561(3) 0.0228(17) Uani 1 1 d . . . 
C32 C 0.2354(6) 0.2014(6) 0.1258(4) 0.034(2) Uani 1 1 d . . . 
H32A H 0.2790 0.2022 0.1510 0.041 Uiso 1 1 calc R . . 
H32B H 0.2260 0.2435 0.1312 0.041 Uiso 1 1 calc R . . 
C33 C 0.2613(6) 0.1910(5) 0.0769(4) 0.031(2) Uani 1 1 d . . . 
C34 C 0.3410(7) 0.2080(6) 0.0695(4) 0.039(3) Uani 1 1 d . . . 
H34 H 0.3831 0.2255 0.0958 0.046 Uiso 1 1 calc R . . 
C35 C 0.3582(7) 0.1991(6) 0.0229(5) 0.045(3) Uani 1 1 d . . . 
H35 H 0.4125 0.2104 0.0169 0.055 Uiso 1 1 calc R . . 
C36 C 0.2962(7) 0.1738(6) -0.0150(4) 0.040(3) Uani 1 1 d . . . 
H36 H 0.3067 0.1675 -0.0473 0.048 Uiso 1 1 calc R . . 
C37 C 0.2187(7) 0.1580(5) -0.0044(4) 0.038(3) Uani 1 1 d . . . 
H37 H 0.1758 0.1398 -0.0302 0.045 Uiso 1 1 calc R . . 
N38 N 0.2002(5) 0.1667(4) 0.0400(3) 0.0254(17) Uani 1 1 d . . . 
C39 C 0.3274(8) 0.2589(8) 0.7015(4) 0.051(3) Uani 1 1 d . . . 
C40 C 0.3751(8) 0.2722(8) 0.7518(4) 0.051(3) Uani 1 1 d . . . 
H40A H 0.3880 0.2331 0.7582 0.061 Uiso 1 1 calc R . . 
H40B H 0.4265 0.3070 0.7533 0.061 Uiso 1 1 calc R . . 
C41 C 0.3286(8) 0.2914(8) 0.7903(4) 0.050(3) Uani 1 1 d . . . 
H41A H 0.2790 0.2555 0.7904 0.060 Uiso 1 1 calc R . . 
H41B H 0.3128 0.3289 0.7830 0.060 Uiso 1 1 calc R . . 
C42 C 0.3802(7) 0.3087(7) 0.8406(4) 0.044(3) Uani 1 1 d . . . 
H42A H 0.3905 0.2696 0.8491 0.053 Uiso 1 1 calc R . . 
H42B H 0.4328 0.3404 0.8388 0.053 Uiso 1 1 calc R . . 
N43 N 0.3428(5) 0.3356(4) 0.8794(3) 0.0304(19) Uani 1 1 d . . . 
C44 C 0.3286(8) 0.3952(6) 0.8682(4) 0.044(3) Uani 1 1 d . . . 
H44A H 0.2749 0.3839 0.8489 0.053 Uiso 1 1 calc R . . 
H44B H 0.3692 0.4159 0.8485 0.053 Uiso 1 1 calc R . . 
C45 C 0.3328(7) 0.4429(6) 0.9131(5) 0.044(3) Uani 1 1 d . . . 
C46 C 0.2915(7) 0.4875(6) 0.9143(5) 0.049(3) Uani 1 1 d . . . 
H46 H 0.2590 0.4889 0.8860 0.059 Uiso 1 1 calc R . . 
C47 C 0.2966(7) 0.5286(6) 0.9548(5) 0.048(3) Uani 1 1 d . . . 
H47 H 0.2651 0.5567 0.9556 0.058 Uiso 1 1 calc R . . 
C48 C 0.3494(8) 0.5297(6) 0.9963(5) 0.052(3) Uani 1 1 d . . . 
H48 H 0.3566 0.5597 1.0249 0.063 Uiso 1 1 calc R . . 
C49 C 0.3895(6) 0.4850(5) 0.9929(4) 0.038(3) Uani 1 1 d . . . 
H49 H 0.4252 0.4848 1.0202 0.045 Uiso 1 1 calc R . . 
N50 N 0.3811(5) 0.4414(5) 0.9531(4) 0.037(2) Uani 1 1 d . . . 
C51 C 0.2657(7) 0.2877(6) 0.8849(4) 0.038(3) Uani 1 1 d . . . 
H51A H 0.2713 0.2442 0.8796 0.046 Uiso 1 1 calc R . . 
H51B H 0.2228 0.2888 0.8601 0.046 Uiso 1 1 calc R . . 
C52 C 0.2410(6) 0.2999(5) 0.9340(4) 0.031(2) Uani 1 1 d . . . 
C53 C 0.1615(7) 0.2857(6) 0.9414(4) 0.043(3) Uani 1 1 d . . . 
H53 H 0.1194 0.2692 0.9150 0.052 Uiso 1 1 calc R . . 
C54 C 0.1449(7) 0.2956(6) 0.9870(4) 0.040(3) Uani 1 1 d . . . 
H54 H 0.0907 0.2859 0.9930 0.048 Uiso 1 1 calc R . . 
C55 C 0.2076(7) 0.3200(5) 1.0250(4) 0.037(3) Uani 1 1 d . . . 
H55 H 0.1965 0.3271 1.0570 0.044 Uiso 1 1 calc R . . 
C56 C 0.2872(6) 0.3341(5) 1.0155(4) 0.031(2) Uani 1 1 d . . . 
H56 H 0.3305 0.3512 1.0412 0.037 Uiso 1 1 calc R . . 
N57 N 0.3023(5) 0.3233(4) 0.9698(3) 0.0282(18) Uani 1 1 d . . . 
C58 C -0.2204(8) 0.3213(7) 0.6971(4) 0.047(3) Uani 1 1 d . . . 
C59 C -0.2435(8) 0.3372(7) 0.7478(4) 0.050(3) Uani 1 1 d . . . 
H59A H -0.2538 0.3790 0.7509 0.060 Uiso 1 1 calc R . . 
H59B H -0.2937 0.3039 0.7514 0.060 Uiso 1 1 calc R . . 
C60 C -0.1772(7) 0.3402(7) 0.7877(4) 0.042(3) Uani 1 1 d . . . 
H60A H -0.1285 0.3764 0.7866 0.051 Uiso 1 1 calc R . . 
H60B H -0.1630 0.3000 0.7832 0.051 Uiso 1 1 calc R . . 
C61 C -0.2071(7) 0.3493(6) 0.8369(4) 0.036(3) Uani 1 1 d . . . 
H61A H -0.2154 0.3918 0.8425 0.043 Uiso 1 1 calc R . . 
H61B H -0.2596 0.3161 0.8361 0.043 Uiso 1 1 calc R . . 
N62 N -0.1489(5) 0.3448(4) 0.8779(3) 0.0286(18) Uani 1 1 d . . . 
C63 C -0.0717(7) 0.3957(6) 0.8814(4) 0.037(3) Uani 1 1 d . . . 
H63A H -0.0817 0.4352 0.8734 0.044 Uiso 1 1 calc R . . 
H63B H -0.0395 0.3823 0.8577 0.044 Uiso 1 1 calc R . . 
C64 C -0.0248(6) 0.4101(5) 0.9311(4) 0.031(2) Uani 1 1 d . . . 
C65 C 0.0588(7) 0.4291(6) 0.9383(5) 0.041(3) Uani 1 1 d . . . 
H65 H 0.0880 0.4318 0.9117 0.049 Uiso 1 1 calc R . . 
C66 C 0.0995(7) 0.4441(6) 0.9854(5) 0.044(3) Uani 1 1 d . . . 
H66 H 0.1566 0.4580 0.9914 0.053 Uiso 1 1 calc R . . 
C67 C 0.0545(7) 0.4381(5) 1.0225(5) 0.041(3) Uani 1 1 d . . . 
H67 H 0.0803 0.4480 1.0549 0.049 Uiso 1 1 calc R . . 
C68 C -0.0291(6) 0.4174(5) 1.0127(4) 0.032(2) Uani 1 1 d . . . 
H68 H -0.0597 0.4125 1.0386 0.038 Uiso 1 1 calc R . . 
N69 N -0.0673(5) 0.4044(4) 0.9678(3) 0.0277(18) Uani 1 1 d . . . 
C70 C -0.1366(7) 0.2814(5) 0.8699(4) 0.035(2) Uani 1 1 d . . . 
H70A H -0.0924 0.2839 0.8504 0.042 Uiso 1 1 calc R . . 
H70B H -0.1861 0.2498 0.8511 0.042 Uiso 1 1 calc R . . 
C71 C -0.1170(6) 0.2573(4) 0.9153(4) 0.028(2) Uani 1 1 d . . . 
C72 C -0.0723(6) 0.2159(6) 0.9166(5) 0.039(3) Uani 1 1 d . . . 
H72 H -0.0505 0.2030 0.8890 0.047 Uiso 1 1 calc R . . 
C73 C -0.0596(7) 0.1931(5) 0.9599(5) 0.041(3) Uani 1 1 d . . . 
H73 H -0.0297 0.1640 0.9619 0.049 Uiso 1 1 calc R . . 
C74 C -0.0911(6) 0.2134(5) 0.9996(4) 0.036(3) Uani 1 1 d . . . 
H74 H -0.0828 0.1994 1.0294 0.044 Uiso 1 1 calc R . . 
C75 C -0.1345(6) 0.2545(5) 0.9942(4) 0.029(2) Uani 1 1 d . . . 
H75 H -0.1580 0.2676 1.0210 0.035 Uiso 1 1 calc R . . 
N76 N -0.1462(5) 0.2776(4) 0.9539(3) 0.0268(18) Uani 1 1 d . . . 
O1W O 0.0230(5) 0.0485(4) 0.9016(3) 0.0414(19) Uani 1 1 d . . . 
O2W O 0.6833(5) 0.1602(4) 0.9051(3) 0.048(2) Uani 1 1 d . . . 
O3W O 0.3730(6) 0.0365(5) 0.1813(3) 0.054(2) Uani 1 1 d . . . 
O4W O 0.0393(6) 0.2110(5) 0.8276(3) 0.054(2) Uani 1 1 d . . . 
O5W O 0.7607(6) 0.1207(5) 0.8258(4) 0.061(3) Uani 1 1 d . . . 
O6W O 0.7812(5) 0.0285(5) 0.5866(4) 0.067(3) Uani 1 1 d . . . 
O7W O 0.8999(7) 0.1300(6) 0.1433(3) 0.069(3) Uani 1 1 d . . . 
O8W O 0.9618(6) 0.1387(6) 0.6224(4) 0.069(3) Uani 1 1 d . . . 
O9W O 0.5840(6) 0.3168(7) 0.8647(4) 0.075(3) Uani 1 1 d . . . 
O10W O 0.4836(17) 0.9111(11) 0.1289(9) 0.088(8) Uani 0.50 1 d P . . 
O11W O 0.4795(7) 0.1814(9) 0.5245(4) 0.114(4) Uani 1 1 d . . . 
O12W O 0.1334(7) 0.4269(6) 0.8238(4) 0.073(3) Uani 1 1 d . . . 
O13W O 0.0894(6) 0.9504(6) 0.1791(4) 0.072(3) Uani 1 1 d . . . 
O14W O 0.7874(8) 0.3218(6) 0.4651(4) 0.081(4) Uani 1 1 d . . . 
O15W O 0.4827(9) 0.4180(7) 0.1096(4) 0.088(4) Uani 1 1 d . . . 
O16W O 0.1223(8) 0.1275(6) 0.8487(5) 0.089(4) Uani 1 1 d . . . 
O17W O 0.8951(7) 0.1494(6) 0.7674(4) 0.084(4) Uani 1 1 d . . . 
O18W O 0.8175(8) 0.3816(7) 0.1095(4) 0.083(4) Uani 1 1 d . . . 
O19W O 0.6982(7) 0.1281(7) 0.5443(4) 0.082(4) Uani 1 1 d . . . 
O20W O 0.1034(8) 0.3864(7) 0.6135(4) 0.089(4) Uani 1 1 d . . . 
O21W O 0.8589(9) 0.0298(7) 0.1956(5) 0.100(4) Uani 1 1 d . . . 
O22W O 0.5373(9) 0.3135(7) 0.3903(4) 0.105(5) Uani 1 1 d . . . 
O23W O 0.2468(8) 1.0015(6) 0.2371(5) 0.092(4) Uani 1 1 d . . . 
O24W O 0.0213(9) 0.0364(9) 0.2193(6) 0.116(5) Uani 1 1 d . . . 
O25W O 0.4647(7) 0.2577(9) 0.1871(4) 0.114(4) Uani 1 1 d . . . 
O26W O 0.5226(8) 0.0682(7) 0.5795(6) 0.105(5) Uani 1 1 d . . . 
O27W O 0.8908(9) 0.2970(6) 0.1345(5) 0.092(4) Uani 1 1 d . . . 
O28W O 0.4262(9) 0.5161(7) 0.1316(5) 0.098(4) Uani 1 1 d . . . 
O29W O 0.9441(8) 0.2269(9) 0.2270(5) 0.119(6) Uani 1 1 d . . . 
O30W O 0.7376(11) 0.5202(8) 0.8928(8) 0.141(7) Uani 1 1 d . . . 
O31W O 0.0776(11) 0.0903(8) 0.7416(7) 0.049(4) Uani 0.50 1 d P . . 
O32W O 0.3330(10) 0.0193(8) 0.5908(7) 0.120(5) Uani 1 1 d . . . 
O33W O 0.1830(8) 0.1071(8) 0.4803(8) 0.132(7) Uani 1 1 d . . . 
O34W O 0.3924(9) 0.0548(9) 0.3856(5) 0.111(5) Uani 1 1 d . . . 
O35W O 0.0444(10) 0.3218(6) 0.1062(7) 0.130(7) Uani 1 1 d . . . 
O36W O 0.0561(9) 0.5171(8) 0.8401(6) 0.113(5) Uani 1 1 d . . . 
O37W O 0.9500(10) 0.2037(12) 0.3233(6) 0.068(6) Uani 0.50 1 d P . . 
O38W O 0.4070(14) 0.1516(8) 0.8835(6) 0.060(5) Uani 0.50 1 d P . . 
O39W O 0.7390(10) 0.3841(8) 0.1913(6) 0.123(6) Uani 1 1 d . . . 
O40W O 0.6041(10) 0.4543(9) 0.1855(6) 0.129(6) Uani 1 1 d . . . 
O41W O 0.5935(12) 0.3809(13) 0.7816(7) 0.069(7) Uani 0.50 1 d P . . 
O42W O 0.4423(11) 0.9448(8) 0.1525(7) 0.057(5) Uani 0.50 1 d P . . 
O43W O 0.746(2) 0.9577(9) 0.1104(8) 0.110(12) Uani 0.50 1 d P . . 
O44W O 0.5269(11) 0.1993(10) 0.8016(10) 0.091(10) Uani 0.50 1 d P . . 
O45W O 0.6554(16) 0.1634(18) 0.7779(8) 0.121(14) Uani 0.50 1 d P . . 
O46W O 0.2629(11) 0.1337(10) 0.8115(7) 0.061(5) Uani 0.50 1 d P . . 
O47W O 0.5561(10) 0.1843(12) 0.6642(10) 0.087(9) Uani 0.50 1 d P . . 
O48W O 0.5471(11) 0.3155(17) 0.6849(7) 0.102(11) Uani 0.50 1 d P . . 
O49W O 0.6148(11) 0.3153(10) 0.2442(7) 0.059(5) Uani 0.50 1 d P . . 
O50W O 0.9680(11) 0.0804(10) 0.3434(8) 0.061(5) Uani 0.50 1 d P . . 
O51W O 0.0800(14) 0.9518(10) 0.3010(6) 0.064(6) Uani 0.50 1 d P . . 
O52W O 0.3127(9) 0.3457(7) 0.5297(4) 0.101(4) Uani 1 1 d . . . 
O53W O 0.3876(12) 0.3407(9) 0.1645(8) 0.063(5) Uani 0.50 1 d P . . 
O54W O 0.7546(14) 0.5388(10) 0.2386(9) 0.088(9) Uani 0.50 1 d P . . 
O55W O 0.5748(13) -0.1214(11) 0.2869(12) 0.091(8) Uani 0.50 1 d P . . 
O56W O 0.9888(12) 0.0263(11) 0.4459(7) 0.074(7) Uani 0.50 1 d P . . 
O57W O -0.246(2) 0.5106(11) 0.5636(8) 0.098(10) Uani 0.50 1 d P . . 
O58W O 0.8213(18) 0.3009(15) 0.2302(9) 0.102(9) Uani 0.50 1 d P . . 
O59W O -0.2744(19) 0.4796(14) 0.6625(11) 0.112(11) Uani 0.50 1 d P . . 
O60W O 0.272(3) 0.4657(13) 0.5770(12) 0.132(14) Uani 0.50 1 d P . . 
O61W O 0.474(2) 0.461(2) 0.7708(12) 0.156(17) Uani 0.50 1 d P . . 
O62W O -0.423(2) 0.3974(17) 0.6165(10) 0.120(11) Uani 0.50 1 d P . . 
O63W O 0.145(2) 0.3862(13) 0.3504(14) 0.126(13) Uani 0.50 1 d P . . 
O64W O 0.8136(11) -0.0006(9) 0.2950(8) 0.060(5) Uani 0.50 1 d P . . 
  
loop_ 
 _atom_site_aniso_label 
 _atom_site_aniso_U_11 
 _atom_site_aniso_U_22 
 _atom_site_aniso_U_33 
 _atom_site_aniso_U_23 
 _atom_site_aniso_U_13 
 _atom_site_aniso_U_12 
Mo1 0.0341(5) 0.0484(6) 0.0183(4) 0.0006(4) -0.0002(4) 0.0116(4) 
Mo2 0.0387(5) 0.0476(6) 0.0183(4) -0.0010(4) 0.0000(4) 0.0162(4) 
Mo3 0.0673(9) 0.1391(15) 0.0324(6) 0.0070(8) -0.0152(6) 0.0493(10) 
Mo4 0.0631(8) 0.0982(10) 0.0197(5) 0.0044(6) -0.0016(5) 0.0324(7) 
Mo5 0.0781(9) 0.1517(16) 0.0166(5) -0.0035(7) -0.0004(5) 0.0693(10) 
Mo6 0.1002(12) 0.193(2) 0.0232(6) -0.0138(8) 0.0052(7) 0.1016(14) 
Mo7 0.0266(5) 0.0496(6) 0.0269(5) 0.0041(4) 0.0065(4) 0.0145(4) 
Mo8 0.0255(4) 0.0340(5) 0.0195(4) 0.0060(3) 0.0000(3) 0.0113(4) 
Mo9 0.0390(5) 0.0537(6) 0.0220(5) 0.0125(4) 0.0072(4) 0.0175(5) 
Mo10 0.0427(6) 0.0524(6) 0.0209(4) 0.0112(4) 0.0046(4) 0.0217(5) 
Mo11 0.0733(9) 0.1154(13) 0.0353(6) 0.0039(7) 0.0245(6) 0.0399(9) 
Mo12 0.0700(9) 0.1104(12) 0.0252(6) 0.0078(6) 0.0104(5) 0.0344(8) 
Mo13 0.0729(8) 0.0979(10) 0.0211(5) 0.0132(6) 0.0035(5) 0.0510(8) 
Mo14 0.0867(10) 0.1330(14) 0.0298(6) 0.0145(7) -0.0066(6) 0.0748(10) 
Mo15 0.0236(4) 0.0451(6) 0.0303(5) 0.0090(4) 0.0038(4) 0.0131(4) 
Mo16 0.0251(4) 0.0322(5) 0.0280(5) 0.0041(4) 0.0027(3) 0.0115(4) 
P1 0.0346(17) 0.086(3) 0.0273(16) 0.0017(16) -0.0088(13) 0.0094(17) 
P2 0.057(2) 0.073(2) 0.0358(17) 0.0000(16) -0.0035(15) 0.0363(19) 
P3 0.075(3) 0.074(3) 0.0364(18) -0.0140(17) -0.0112(17) 0.048(2) 
P4 0.0456(18) 0.082(3) 0.0255(15) 0.0073(15) 0.0113(13) 0.0351(18) 
P5 0.053(2) 0.064(2) 0.0417(18) 0.0107(16) 0.0175(15) 0.0281(18) 
P6 0.0454(18) 0.069(2) 0.0351(17) 0.0140(16) 0.0202(14) 0.0181(17) 
P7 0.0410(17) 0.066(2) 0.0269(15) 0.0071(14) -0.0012(12) 0.0299(16) 
P8 0.083(3) 0.063(2) 0.0352(17) 0.0137(16) 0.0056(17) 0.048(2) 
O1 0.034(4) 0.050(5) 0.018(3) 0.002(3) 0.004(3) 0.007(3) 
O2 0.044(5) 0.058(5) 0.018(4) 0.003(3) -0.003(3) 0.017(4) 
O3 0.071(6) 0.035(4) 0.020(4) -0.003(3) -0.013(4) 0.011(4) 
O4 0.046(5) 0.052(5) 0.024(4) 0.004(3) -0.007(3) 0.013(4) 
O5 0.040(4) 0.070(6) 0.019(4) 0.000(4) 0.002(3) 0.024(4) 
O6 0.056(5) 0.054(5) 0.021(4) -0.005(3) -0.003(3) 0.025(4) 
O7 0.042(4) 0.047(5) 0.020(4) -0.002(3) 0.006(3) 0.018(4) 
O8 0.083(7) 0.040(5) 0.030(4) -0.003(4) -0.010(4) 0.022(5) 
O9 0.043(5) 0.064(5) 0.022(4) 0.010(4) 0.006(3) 0.024(4) 
O10 0.057(6) 0.095(7) 0.022(4) 0.008(4) -0.001(4) 0.041(5) 
O11 0.108(10) 0.181(15) 0.044(6) 0.013(7) -0.025(6) 0.098(11) 
O12 0.077(8) 0.161(14) 0.052(7) -0.010(8) -0.035(6) 0.051(9) 
O13 0.078(7) 0.132(11) 0.024(5) 0.006(6) -0.002(5) 0.037(7) 
O14 0.039(5) 0.118(9) 0.043(5) 0.016(6) -0.009(4) 0.034(6) 
O15 0.055(6) 0.092(8) 0.023(4) -0.007(4) -0.010(4) 0.019(5) 
O16 0.068(6) 0.099(8) 0.031(5) 0.024(5) 0.001(4) 0.043(6) 
O17 0.090(8) 0.133(11) 0.036(5) 0.021(6) 0.018(5) 0.048(8) 
O18 0.078(8) 0.130(11) 0.046(6) -0.028(6) -0.015(5) 0.051(8) 
O19 0.065(7) 0.208(16) 0.041(6) 0.047(8) 0.017(5) 0.076(9) 
O20 0.102(10) 0.207(17) 0.038(6) -0.039(8) -0.024(6) 0.089(11) 
O21 0.086(8) 0.205(15) 0.016(4) -0.018(6) -0.001(5) 0.085(10) 
O22 0.062(6) 0.140(10) 0.018(4) 0.014(5) 0.011(4) 0.065(7) 
O23 0.094(8) 0.115(9) 0.029(5) -0.027(5) -0.011(5) 0.068(7) 
O24 0.084(9) 0.28(2) 0.037(6) 0.013(9) 0.029(6) 0.098(12) 
O25 0.158(14) 0.173(16) 0.076(9) -0.039(9) -0.026(9) 0.129(13) 
O26 0.084(7) 0.115(9) 0.027(5) -0.006(5) 0.005(5) 0.068(7) 
O27 0.034(4) 0.073(6) 0.031(4) 0.016(4) 0.010(3) 0.030(4) 
O28 0.024(4) 0.064(6) 0.042(5) 0.002(4) 0.003(3) 0.005(4) 
O29 0.046(5) 0.040(4) 0.026(4) 0.000(3) 0.010(3) 0.014(4) 
O30 0.041(4) 0.043(5) 0.032(4) 0.019(3) -0.002(3) 0.015(4) 
O31 0.030(4) 0.042(4) 0.022(3) 0.010(3) 0.004(3) 0.016(3) 
O32 0.038(4) 0.043(4) 0.018(3) 0.006(3) -0.003(3) 0.018(3) 
O33 0.030(4) 0.062(5) 0.032(4) 0.020(4) 0.010(3) 0.016(4) 
O34 0.037(4) 0.045(5) 0.041(4) 0.016(4) 0.006(3) 0.022(4) 
O35 0.047(5) 0.059(6) 0.040(5) 0.018(4) 0.010(4) 0.024(4) 
O36 0.047(5) 0.061(6) 0.037(4) 0.021(4) 0.018(4) 0.015(4) 
O37 0.050(5) 0.075(6) 0.033(4) 0.017(4) 0.010(4) 0.025(5) 
O38 0.045(5) 0.051(5) 0.035(4) 0.009(4) 0.011(4) 0.019(4) 
O39 0.034(4) 0.052(5) 0.021(4) 0.006(3) -0.001(3) 0.013(4) 
O40 0.068(6) 0.058(6) 0.034(4) 0.011(4) 0.006(4) 0.036(5) 
O41 0.037(4) 0.056(5) 0.032(4) 0.013(4) 0.003(3) 0.026(4) 
O42 0.050(5) 0.065(6) 0.021(4) 0.008(4) 0.004(3) 0.034(4) 
O43 0.102(9) 0.139(12) 0.051(6) 0.030(7) 0.047(6) 0.049(9) 
O44 0.125(12) 0.113(11) 0.086(9) -0.012(8) 0.048(9) 0.054(9) 
O45 0.081(8) 0.137(11) 0.025(5) -0.007(6) 0.014(5) 0.036(8) 
O46 0.056(6) 0.098(8) 0.038(5) 0.004(5) 0.027(4) 0.037(6) 
O47 0.057(6) 0.074(7) 0.041(5) -0.004(5) 0.016(4) 0.027(5) 
O48 0.065(6) 0.090(7) 0.031(5) 0.017(5) 0.025(4) 0.029(5) 
O49 0.100(10) 0.150(13) 0.055(7) -0.009(8) 0.023(7) 0.057(9) 
O50 0.109(10) 0.182(15) 0.020(5) 0.034(7) 0.005(5) 0.057(10) 
O51 0.122(11) 0.117(10) 0.043(6) 0.033(6) 0.024(6) 0.057(9) 
O52 0.085(8) 0.147(11) 0.023(4) -0.009(6) -0.007(5) 0.077(8) 
O53 0.087(7) 0.125(9) 0.013(4) 0.008(5) -0.001(4) 0.071(7) 
O54 0.048(5) 0.081(7) 0.023(4) 0.009(4) -0.004(3) 0.033(5) 
O55 0.092(8) 0.087(8) 0.032(5) 0.027(5) 0.004(5) 0.050(6) 
O56 0.146(13) 0.171(15) 0.060(7) 0.030(8) -0.027(8) 0.115(12) 
O57 0.076(8) 0.166(14) 0.045(6) -0.007(7) -0.013(5) 0.065(9) 
O58 0.070(6) 0.093(8) 0.033(5) 0.003(5) -0.014(4) 0.053(6) 
O59 0.026(4) 0.068(6) 0.051(5) 0.018(4) 0.012(4) 0.009(4) 
O60 0.033(4) 0.049(5) 0.036(4) 0.001(4) -0.004(3) 0.014(4) 
O61 0.041(5) 0.053(5) 0.043(5) 0.004(4) 0.002(4) 0.015(4) 
O62 0.031(4) 0.053(5) 0.035(4) 0.015(4) 0.002(3) 0.018(4) 
O63 0.045(5) 0.034(4) 0.053(5) 0.015(4) 0.012(4) 0.025(4) 
O64 0.022(4) 0.047(5) 0.035(4) 0.008(3) -0.002(3) 0.017(3) 
O65 0.046(6) 0.104(9) 0.061(7) 0.013(6) -0.013(5) -0.005(6) 
O66 0.087(8) 0.085(8) 0.067(7) -0.009(6) -0.004(6) 0.048(7) 
O67 0.105(9) 0.063(7) 0.069(7) -0.017(6) -0.006(6) 0.048(7) 
O68 0.045(5) 0.111(9) 0.061(6) 0.023(6) 0.021(5) 0.040(6) 
O69 0.087(8) 0.062(6) 0.065(7) 0.016(5) 0.030(6) 0.041(6) 
O80 0.059(6) 0.084(8) 0.065(7) 0.026(6) 0.024(5) 0.015(6) 
O81 0.049(5) 0.084(7) 0.043(5) 0.015(5) 0.004(4) 0.034(5) 
O82 0.122(10) 0.099(9) 0.060(7) 0.019(6) 0.020(7) 0.076(8) 
C1 0.041(7) 0.090(11) 0.021(6) -0.002(6) -0.004(5) 0.024(7) 
C2 0.039(7) 0.119(13) 0.030(7) -0.008(7) 0.001(5) 0.042(8) 
C3 0.023(6) 0.105(12) 0.028(6) -0.013(7) 0.004(5) 0.021(6) 
C4 0.031(6) 0.105(12) 0.030(6) 0.004(7) 0.004(5) 0.021(7) 
N5 0.025(4) 0.066(7) 0.018(4) -0.003(4) 0.006(3) 0.018(4) 
C6 0.028(6) 0.062(8) 0.021(5) -0.002(5) 0.002(4) 0.007(5) 
C7 0.033(6) 0.060(8) 0.025(5) 0.009(5) 0.013(4) 0.025(5) 
C8 0.037(6) 0.057(8) 0.032(6) 0.017(5) 0.007(5) 0.010(6) 
C9 0.032(6) 0.054(7) 0.042(7) 0.011(6) 0.000(5) 0.017(5) 
C10 0.040(7) 0.034(6) 0.040(6) 0.006(5) -0.011(5) 0.000(5) 
C11 0.035(6) 0.030(6) 0.033(6) 0.017(5) 0.009(5) 0.001(5) 
N12 0.029(4) 0.034(5) 0.025(4) 0.005(4) 0.005(4) 0.006(4) 
C13 0.048(8) 0.077(10) 0.041(7) -0.003(7) 0.008(6) 0.029(7) 
C14 0.028(6) 0.061(8) 0.036(6) -0.003(6) -0.001(5) 0.019(5) 
C15 0.034(7) 0.065(9) 0.059(9) -0.016(7) 0.007(6) 0.020(6) 
C16 0.049(8) 0.064(10) 0.090(12) 0.011(9) -0.002(8) 0.030(7) 
C17 0.048(7) 0.044(7) 0.057(8) 0.004(6) 0.006(6) 0.017(6) 
C18 0.034(6) 0.037(6) 0.052(7) 0.004(6) 0.010(5) 0.007(5) 
N19 0.019(4) 0.041(5) 0.043(6) -0.006(4) 0.005(4) 0.004(4) 
C20 0.052(8) 0.075(10) 0.030(6) -0.015(6) 0.003(6) 0.027(7) 
C21 0.054(8) 0.090(11) 0.020(6) 0.000(6) 0.002(5) 0.040(8) 
C22 0.031(6) 0.062(8) 0.022(5) 0.000(5) -0.004(4) 0.018(5) 
C23 0.030(6) 0.051(7) 0.022(5) -0.007(5) -0.004(4) 0.015(5) 
N24 0.032(5) 0.044(5) 0.023(4) 0.008(4) 0.002(4) 0.017(4) 
C25 0.047(6) 0.039(6) 0.023(5) 0.014(5) -0.001(5) 0.020(5) 
C26 0.029(5) 0.029(5) 0.027(5) 0.011(4) 0.010(4) 0.007(4) 
C27 0.038(6) 0.051(7) 0.045(7) 0.016(6) 0.006(5) 0.022(6) 
C28 0.039(6) 0.037(6) 0.067(9) 0.023(6) 0.015(6) 0.021(5) 
C29 0.038(6) 0.025(5) 0.028(5) -0.011(4) 0.006(4) 0.006(4) 
C30 0.032(6) 0.035(6) 0.025(5) 0.010(4) -0.003(4) 0.016(5) 
N31 0.021(4) 0.031(4) 0.022(4) 0.011(3) 0.006(3) 0.013(3) 
C32 0.026(5) 0.043(6) 0.031(6) 0.012(5) 0.007(4) 0.005(5) 
C33 0.030(5) 0.028(5) 0.040(6) 0.014(5) 0.003(4) 0.012(4) 
C34 0.033(6) 0.036(6) 0.047(7) 0.013(5) 0.006(5) 0.010(5) 
C35 0.038(7) 0.046(7) 0.053(8) 0.023(6) 0.003(6) 0.009(5) 
C36 0.047(7) 0.041(7) 0.039(6) 0.018(5) 0.016(5) 0.017(5) 
C37 0.039(6) 0.033(6) 0.032(6) 0.006(5) -0.002(5) -0.001(5) 
N38 0.026(4) 0.022(4) 0.027(4) 0.005(3) 0.004(3) 0.006(3) 
C39 0.046(7) 0.091(11) 0.028(6) 0.021(6) 0.018(5) 0.031(7) 
C40 0.053(8) 0.076(10) 0.030(6) 0.011(6) 0.012(6) 0.027(7) 
C41 0.040(7) 0.090(10) 0.030(6) 0.010(6) 0.013(5) 0.032(7) 
C42 0.042(7) 0.067(9) 0.028(6) 0.013(6) 0.002(5) 0.022(6) 
N43 0.019(4) 0.045(5) 0.025(4) 0.003(4) -0.001(3) 0.009(4) 
C44 0.042(7) 0.056(8) 0.041(7) 0.019(6) 0.006(5) 0.022(6) 
C45 0.038(6) 0.053(8) 0.050(7) 0.023(6) 0.005(5) 0.021(6) 
C46 0.038(7) 0.052(8) 0.062(9) 0.017(7) 0.006(6) 0.019(6) 
C47 0.031(6) 0.042(7) 0.070(9) 0.009(6) 0.007(6) 0.012(5) 
C48 0.047(8) 0.041(7) 0.061(9) 0.011(6) 0.000(6) 0.003(6) 
C49 0.023(5) 0.035(6) 0.048(7) 0.001(5) 0.007(5) 0.000(5) 
N50 0.016(4) 0.046(6) 0.050(6) 0.014(5) 0.009(4) 0.010(4) 
C51 0.031(6) 0.054(7) 0.028(6) 0.011(5) 0.004(4) 0.012(5) 
C52 0.022(5) 0.032(6) 0.041(6) 0.015(5) 0.000(4) 0.007(4) 
C53 0.028(6) 0.060(8) 0.041(7) 0.013(6) 0.003(5) 0.009(5) 
C54 0.025(5) 0.046(7) 0.044(7) 0.004(5) 0.014(5) 0.003(5) 
C55 0.041(6) 0.036(6) 0.033(6) 0.013(5) 0.021(5) 0.004(5) 
C56 0.034(6) 0.032(6) 0.030(5) 0.008(4) 0.006(4) 0.014(5) 
N57 0.026(4) 0.038(5) 0.022(4) 0.013(4) 0.002(3) 0.009(4) 
C58 0.057(8) 0.076(9) 0.024(6) 0.006(6) 0.006(5) 0.046(7) 
C59 0.053(8) 0.067(9) 0.028(6) -0.008(6) -0.013(5) 0.031(7) 
C60 0.044(7) 0.060(8) 0.022(5) 0.001(5) 0.001(5) 0.019(6) 
C61 0.049(7) 0.044(6) 0.021(5) 0.005(5) 0.011(5) 0.020(5) 
N62 0.025(4) 0.034(5) 0.031(5) 0.015(4) 0.012(4) 0.010(4) 
C63 0.035(6) 0.038(6) 0.039(6) 0.015(5) 0.006(5) 0.011(5) 
C64 0.031(5) 0.022(5) 0.038(6) 0.001(4) 0.004(5) 0.007(4) 
C65 0.026(6) 0.047(7) 0.047(7) 0.015(6) -0.001(5) 0.006(5) 
C66 0.030(6) 0.044(7) 0.051(7) 0.002(6) -0.004(5) 0.008(5) 
C67 0.032(6) 0.033(6) 0.045(7) -0.003(5) -0.011(5) 0.001(5) 
C68 0.036(6) 0.036(6) 0.030(6) 0.005(4) 0.008(4) 0.020(5) 
N69 0.025(4) 0.022(4) 0.031(5) 0.002(3) -0.003(4) 0.004(3) 
C70 0.038(6) 0.037(6) 0.028(5) -0.004(5) 0.003(5) 0.013(5) 
C71 0.024(5) 0.015(5) 0.042(6) 0.005(4) 0.002(4) 0.001(4) 
C72 0.026(6) 0.045(7) 0.050(7) 0.011(6) 0.005(5) 0.014(5) 
C73 0.030(6) 0.025(6) 0.070(8) 0.015(5) 0.007(5) 0.011(5) 
C74 0.025(5) 0.037(6) 0.043(6) 0.016(5) -0.006(5) 0.002(5) 
C75 0.025(5) 0.029(5) 0.031(5) 0.004(4) -0.001(4) 0.005(4) 
N76 0.026(4) 0.022(4) 0.031(5) 0.001(3) -0.003(3) 0.008(3) 
O1W 0.050(5) 0.047(5) 0.024(4) 0.008(3) 0.006(3) 0.010(4) 
O2W 0.053(5) 0.046(5) 0.038(5) 0.006(4) 0.004(4) 0.008(4) 
O3W 0.058(6) 0.064(6) 0.041(5) 0.000(4) 0.003(4) 0.023(5) 
O4W 0.059(6) 0.062(6) 0.039(5) 0.007(4) 0.012(4) 0.017(5) 
O5W 0.049(5) 0.054(6) 0.069(7) -0.009(5) 0.011(5) 0.008(4) 
O6W 0.023(4) 0.078(7) 0.102(8) 0.052(6) -0.001(5) 0.004(4) 
O7W 0.074(7) 0.115(9) 0.040(5) 0.019(6) 0.018(5) 0.058(7) 
O8W 0.057(6) 0.082(8) 0.056(6) -0.021(5) -0.004(5) 0.023(5) 
O9W 0.047(6) 0.133(11) 0.053(6) 0.003(6) -0.003(5) 0.048(6) 
O10W 0.12(2) 0.054(13) 0.087(17) 0.007(12) 0.040(16) 0.026(14) 
O11W 0.068(5) 0.235(13) 0.044(4) -0.015(6) -0.002(4) 0.074(7) 
O12W 0.083(8) 0.080(8) 0.051(6) -0.013(5) -0.004(5) 0.033(6) 
O13W 0.062(6) 0.076(7) 0.071(7) 0.035(6) 0.002(5) 0.006(5) 
O14W 0.099(9) 0.083(8) 0.042(6) 0.026(5) -0.013(6) 0.003(7) 
O15W 0.125(11) 0.102(10) 0.061(7) 0.013(7) 0.014(7) 0.071(9) 
O16W 0.090(9) 0.088(9) 0.116(11) 0.067(8) 0.043(8) 0.039(7) 
O17W 0.078(8) 0.095(9) 0.080(8) 0.054(7) 0.004(6) 0.015(7) 
O18W 0.109(10) 0.110(10) 0.036(6) 0.015(6) 0.003(6) 0.044(8) 
O19W 0.078(8) 0.110(10) 0.070(7) 0.044(7) 0.016(6) 0.034(7) 
O20W 0.120(10) 0.104(10) 0.043(6) 0.038(6) 0.017(6) 0.025(8) 
O21W 0.127(12) 0.110(11) 0.100(10) 0.033(8) 0.023(9) 0.081(10) 
O22W 0.133(12) 0.114(11) 0.043(6) -0.029(7) -0.019(7) 0.031(9) 
O23W 0.086(9) 0.083(9) 0.087(9) -0.022(7) 0.017(7) 0.008(7) 
O24W 0.089(10) 0.143(14) 0.106(11) -0.018(10) 0.006(8) 0.040(10) 
O25W 0.068(5) 0.235(13) 0.044(4) -0.015(6) -0.002(4) 0.074(7) 
O26W 0.066(8) 0.082(9) 0.160(15) 0.016(9) 0.021(8) 0.015(7) 
O27W 0.118(11) 0.070(8) 0.086(9) -0.001(7) -0.009(8) 0.040(8) 
O28W 0.125(12) 0.102(10) 0.095(10) 0.050(8) 0.042(9) 0.053(9) 
O29W 0.082(9) 0.200(18) 0.073(9) -0.015(10) -0.013(7) 0.063(11) 
O30W 0.122(13) 0.115(13) 0.22(2) 0.099(14) 0.028(13) 0.053(11) 
O31W 0.051(10) 0.032(9) 0.057(11) 0.010(8) 0.021(8) -0.001(8) 
O32W 0.115(12) 0.107(12) 0.143(15) 0.054(11) 0.020(10) 0.028(10) 
O33W 0.060(8) 0.101(11) 0.22(2) -0.028(12) -0.011(10) 0.033(8) 
O34W 0.094(10) 0.165(15) 0.086(10) 0.068(10) 0.028(8) 0.036(10) 
O35W 0.114(12) 0.056(8) 0.197(18) -0.033(10) -0.007(12) 0.023(8) 
O36W 0.088(10) 0.111(12) 0.124(13) 0.020(10) -0.007(9) 0.015(9) 
O37W 0.032(9) 0.125(19) 0.034(10) 0.002(11) -0.002(7) 0.011(11) 
O38W 0.105(16) 0.031(9) 0.031(9) -0.005(7) 0.015(10) 0.006(10) 
O39W 0.118(12) 0.120(13) 0.111(12) -0.016(10) 0.036(10) 0.016(10) 
O40W 0.096(11) 0.156(16) 0.121(13) 0.041(12) -0.005(10) 0.020(11) 
O41W 0.054(11) 0.14(2) 0.042(10) 0.041(12) 0.028(9) 0.063(13) 
O42W 0.055(11) 0.036(9) 0.071(13) -0.025(9) -0.009(9) 0.020(8) 
O43W 0.22(3) 0.026(10) 0.057(13) -0.014(9) -0.094(17) 0.038(14) 
O44W 0.037(10) 0.059(12) 0.16(2) -0.061(14) -0.049(12) 0.040(10) 
O45W 0.12(2) 0.29(4) 0.062(14) 0.12(2) 0.080(14) 0.17(3) 
O46W 0.055(11) 0.077(14) 0.072(13) 0.052(11) 0.030(10) 0.031(10) 
O47W 0.017(8) 0.108(18) 0.13(2) 0.064(16) -0.028(10) 0.002(10) 
O48W 0.027(10) 0.23(3) 0.040(11) 0.024(16) 0.008(8) 0.026(14) 
O49W 0.045(10) 0.067(13) 0.061(12) 0.041(10) 0.001(9) 0.001(9) 
O50W 0.044(10) 0.075(14) 0.068(13) -0.002(11) 0.020(9) 0.024(10) 
O51W 0.110(17) 0.057(12) 0.032(9) 0.024(8) 0.000(10) 0.034(12) 
O52W 0.129(12) 0.117(11) 0.048(7) 0.022(7) 0.004(7) 0.026(9) 
O53W 0.052(11) 0.050(11) 0.091(16) 0.024(11) 0.015(11) 0.013(9) 
O54W 0.076(15) 0.055(12) 0.088(16) -0.041(12) 0.052(13) -0.037(11) 
O55W 0.052(13) 0.058(14) 0.16(3) 0.023(15) 0.015(15) 0.012(11) 
O56W 0.050(12) 0.076(15) 0.056(12) -0.017(11) -0.008(9) -0.023(10) 
O57W 0.21(3) 0.071(15) 0.048(12) 0.016(11) 0.049(16) 0.093(19) 
O58W 0.12(2) 0.13(2) 0.059(15) 0.038(16) 0.042(15) 0.035(19) 
O59W 0.14(2) 0.12(2) 0.14(3) 0.033(19) 0.03(2) 0.12(2) 
O60W 0.23(4) 0.056(15) 0.13(3) 0.028(16) 0.11(3) 0.05(2) 
O61W 0.14(3) 0.18(4) 0.11(3) -0.07(2) -0.10(2) 0.08(3) 
O62W 0.14(3) 0.13(3) 0.073(18) 0.019(18) 0.026(18) 0.02(2) 
O63W 0.14(3) 0.069(17) 0.21(4) 0.05(2) 0.06(3) 0.081(19) 
O64W 0.050(11) 0.038(10) 0.097(16) 0.025(10) 0.002(10) 0.021(8) 
  
_geom_special_details 
; 
 All esds (except the esd in the dihedral angle between two l.s. planes) 
 are estimated using the full covariance matrix.  The cell esds are taken 
 into account individually in the estimation of esds in distances, angles 
 and torsion angles; correlations between esds in cell parameters are only 
 used when they are defined by crystal symmetry.  An approximate (isotropic) 
 treatment of cell esds is used for estimating esds involving l.s. planes. 
; 
  
loop_ 
 _geom_bond_atom_site_label_1 
 _geom_bond_atom_site_label_2 
 _geom_bond_distance 
 _geom_bond_site_symmetry_2 
 _geom_bond_publ_flag 
Mo1 O1 1.715(7) . ? 
Mo1 O3 1.924(8) . ? 
Mo1 O2 1.948(8) . ? 
Mo1 O4 2.115(8) . ? 
Mo1 O5 2.126(7) . ? 
Mo1 O6 2.142(8) . ? 
Mo1 Mo2 2.5630(14) . ? 
Mo2 O7 1.700(7) . ? 
Mo2 O2 1.941(9) . ? 
Mo2 O3 1.957(9) . ? 
Mo2 O8 2.113(9) . ? 
Mo2 O9 2.124(8) . ? 
Mo2 O10 2.144(8) . ? 
Mo3 O11 1.704(14) . ? 
Mo3 O12 1.723(14) . ? 
Mo3 O13 1.847(11) . ? 
Mo3 O14 1.986(10) . ? 
Mo3 O15 2.333(11) . ? 
Mo3 O16 2.361(11) . ? 
Mo3 Mo4 3.209(2) . ? 
Mo4 O17 1.723(13) . ? 
Mo4 O18 1.747(12) . ? 
Mo4 O5 1.801(7) . ? 
Mo4 O13 2.018(11) . ? 
Mo4 O15 2.321(10) . ? 
Mo4 O16 2.392(11) . ? 
Mo5 O19 1.704(14) . ? 
Mo5 O20 1.731(16) . ? 
Mo5 O10 1.772(8) . ? 
Mo5 O21 2.010(10) . ? 
Mo5 O22 2.348(11) . ? 
Mo5 O23 2.377(11) . ? 
Mo5 Mo6 3.210(2) . ? 
Mo6 O24 1.684(17) . ? 
Mo6 O25 1.764(15) . ? 
Mo6 O21 1.839(10) . ? 
Mo6 O26 1.972(9) . ? 
Mo6 O23 2.318(13) . ? 
Mo6 O22 2.363(10) . ? 
Mo7 O27 1.741(9) . ? 
Mo7 O29 1.746(7) . ? 
Mo7 O28 1.749(8) . ? 
Mo7 N12 2.294(9) . ? 
Mo7 N19 2.344(10) . ? 
Mo7 N5 2.360(8) . ? 
Mo8 O30 1.704(8) . ? 
Mo8 O32 1.751(7) . ? 
Mo8 O31 1.753(7) . ? 
Mo8 N31 2.301(8) . ? 
Mo8 N38 2.306(8) . ? 
Mo8 N24 2.353(8) . ? 
Mo9 O33 1.711(8) . ? 
Mo9 O34 1.921(8) . ? 
Mo9 O35 1.951(9) . ? 
Mo9 O36 2.120(8) . ? 
Mo9 O37 2.144(8) . ? 
Mo9 O38 2.155(8) . ? 
Mo9 Mo10 2.5606(14) . ? 
Mo10 O39 1.708(7) . ? 
Mo10 O35 1.929(9) . ? 
Mo10 O34 1.947(8) . ? 
Mo10 O41 2.115(8) . ? 
Mo10 O40 2.120(9) . ? 
Mo10 O42 2.157(7) . ? 
Mo11 O43 1.690(13) . ? 
Mo11 O44 1.714(14) . ? 
Mo11 O45 1.856(12) . ? 
Mo11 O46 1.970(9) . ? 
Mo11 O47 2.339(9) . ? 
Mo11 O48 2.348(10) . ? 
Mo11 Mo12 3.215(2) . ? 
Mo12 O49 1.668(16) . ? 
Mo12 O50 1.747(13) . ? 
Mo12 O37 1.782(9) . ? 
Mo12 O45 2.024(11) . ? 
Mo12 O48 2.310(11) . ? 
Mo12 O47 2.364(10) . ? 
Mo13 O51 1.706(13) . ? 
Mo13 O52 1.751(12) . ? 
Mo13 O42 1.763(7) . ? 
Mo13 O53 2.005(9) . ? 
Mo13 O54 2.333(9) . ? 
Mo13 O55 2.383(11) . ? 
Mo13 Mo14 3.2092(19) . ? 
Mo14 O57 1.703(15) . ? 
Mo14 O56 1.740(13) . ? 
Mo14 O53 1.874(9) . ? 
Mo14 O58 1.970(9) . ? 
Mo14 O55 2.347(12) . ? 
Mo14 O54 2.380(8) . ? 
Mo15 O61 1.732(9) . ? 
Mo15 O59 1.745(8) . ? 
Mo15 O60 1.747(8) . ? 
Mo15 N57 2.306(8) . ? 
Mo15 N50 2.348(10) . ? 
Mo15 N43 2.363(8) . ? 
Mo16 O63 1.744(7) . ? 
Mo16 O62 1.749(8) . ? 
Mo16 O64 1.759(7) . ? 
Mo16 N69 2.322(8) . ? 
Mo16 N76 2.322(8) . ? 
Mo16 N62 2.367(8) . ? 
P1 O65 1.525(12) . ? 
P1 O4 1.538(8) . ? 
P1 O15 1.553(9) . ? 
P1 C1 1.808(16) . ? 
P2 O66 1.461(12) . ? 
P2 O6 1.539(9) . ? 
P2 O16 1.547(9) . ? 
P2 C1 1.860(15) . ? 
P3 O67 1.494(12) . ? 
P3 O8 1.546(11) . ? 
P3 O23 1.547(10) . ? 
P3 C20 1.794(15) . ? 
P4 O68 1.477(12) . ? 
P4 O9 1.532(8) . ? 
P4 O22 1.540(9) . ? 
P4 C20 1.880(16) . ? 
P5 O69 1.510(11) . ? 
P5 O38 1.522(9) . ? 
P5 O47 1.565(10) . ? 
P5 C39 1.815(16) . ? 
P6 O80 1.485(11) . ? 
P6 O36 1.540(9) . ? 
P6 O48 1.573(10) . ? 
P6 C39 1.821(15) . ? 
P7 O81 1.508(11) . ? 
P7 O41 1.538(8) . ? 
P7 O54 1.539(8) . ? 
P7 C58 1.831(14) . ? 
P8 O82 1.489(12) . ? 
P8 O40 1.537(10) . ? 
P8 O55 1.548(10) . ? 
P8 C58 1.810(16) . ? 
O14 C1 1.421(14) . ? 
O26 C20 1.436(15) . ? 
O46 C39 1.453(14) . ? 
O58 C58 1.469(14) . ? 
C1 C2 1.520(16) . ? 
C2 C3 1.546(17) . ? 
C2 H2A 0.9900 . ? 
C2 H2B 0.9900 . ? 
C3 C4 1.530(16) . ? 
C3 H3A 0.9900 . ? 
C3 H3B 0.9900 . ? 
C4 N5 1.511(15) . ? 
C4 H4A 0.9900 . ? 
C4 H4B 0.9900 . ? 
N5 C6 1.465(15) . ? 
N5 C13 1.492(17) . ? 
C6 C7 1.495(15) . ? 
C6 H6A 0.9900 . ? 
C6 H6B 0.9900 . ? 
C7 N12 1.363(13) . ? 
C7 C8 1.371(16) . ? 
C8 C9 1.404(16) . ? 
C8 H8 0.9500 . ? 
C9 C10 1.378(17) . ? 
C9 H9 0.9500 . ? 
C10 C11 1.367(16) . ? 
C10 H10 0.9500 . ? 
C11 N12 1.348(14) . ? 
C11 H11 0.9500 . ? 
C13 C14 1.488(19) . ? 
C13 H13A 0.9900 . ? 
C13 H13B 0.9900 . ? 
C14 N19 1.364(15) . ? 
C14 C15 1.397(18) . ? 
C15 C16 1.37(2) . ? 
C15 H15 0.9500 . ? 
C16 C17 1.38(2) . ? 
C16 H16 0.9500 . ? 
C17 C18 1.395(18) . ? 
C17 H17 0.9500 . ? 
C18 N19 1.318(16) . ? 
C18 H18 0.9500 . ? 
C20 C21 1.537(17) . ? 
C21 C22 1.504(15) . ? 
C21 H21A 0.9900 . ? 
C21 H21B 0.9900 . ? 
C22 C23 1.534(14) . ? 
C22 H22A 0.9900 . ? 
C22 H22B 0.9900 . ? 
C23 N24 1.535(13) . ? 
C23 H23A 0.9900 . ? 
C23 H23B 0.9900 . ? 
N24 C32 1.478(14) . ? 
N24 C25 1.501(14) . ? 
C25 C26 1.469(15) . ? 
C25 H25A 0.9900 . ? 
C25 H25B 0.9900 . ? 
C26 N31 1.336(13) . ? 
C26 C27 1.404(15) . ? 
C27 C28 1.399(18) . ? 
C27 H27 0.9500 . ? 
C28 C29 1.361(17) . ? 
C28 H28 0.9500 . ? 
C29 C30 1.357(15) . ? 
C29 H29 0.9500 . ? 
C30 N31 1.351(13) . ? 
C30 H30 0.9500 . ? 
C32 C33 1.511(15) . ? 
C32 H32A 0.9900 . ? 
C32 H32B 0.9900 . ? 
C33 N38 1.354(13) . ? 
C33 C34 1.383(15) . ? 
C34 C35 1.385(18) . ? 
C34 H34 0.9500 . ? 
C35 C36 1.383(17) . ? 
C35 H35 0.9500 . ? 
C36 C37 1.376(16) . ? 
C36 H36 0.9500 . ? 
C37 N38 1.334(14) . ? 
C37 H37 0.9500 . ? 
C39 C40 1.530(17) . ? 
C40 C41 1.516(16) . ? 
C40 H40A 0.9900 . ? 
C40 H40B 0.9900 . ? 
C41 C42 1.550(16) . ? 
C41 H41A 0.9900 . ? 
C41 H41B 0.9900 . ? 
C42 N43 1.482(15) . ? 
C42 H42A 0.9900 . ? 
C42 H42B 0.9900 . ? 
N43 C44 1.482(15) . ? 
N43 C51 1.487(14) . ? 
C44 C45 1.525(18) . ? 
C44 H44A 0.9900 . ? 
C44 H44B 0.9900 . ? 
C45 N50 1.359(15) . ? 
C45 C46 1.389(17) . ? 
C46 C47 1.347(19) . ? 
C46 H46 0.9500 . ? 
C47 C48 1.420(19) . ? 
C47 H47 0.9500 . ? 
C48 C49 1.376(18) . ? 
C48 H48 0.9500 . ? 
C49 N50 1.352(15) . ? 
C49 H49 0.9500 . ? 
C51 C52 1.510(15) . ? 
C51 H51A 0.9900 . ? 
C51 H51B 0.9900 . ? 
C52 N57 1.335(13) . ? 
C52 C53 1.382(15) . ? 
C53 C54 1.359(17) . ? 
C53 H53 0.9500 . ? 
C54 C55 1.389(17) . ? 
C54 H54 0.9500 . ? 
C55 C56 1.402(15) . ? 
C55 H55 0.9500 . ? 
C56 N57 1.351(13) . ? 
C56 H56 0.9500 . ? 
C58 C59 1.555(16) . ? 
C59 C60 1.525(15) . ? 
C59 H59A 0.9900 . ? 
C59 H59B 0.9900 . ? 
C60 C61 1.544(14) . ? 
C60 H60A 0.9900 . ? 
C60 H60B 0.9900 . ? 
C61 N62 1.507(14) . ? 
C61 H61A 0.9900 . ? 
C61 H61B 0.9900 . ? 
N62 C63 1.467(14) . ? 
N62 C70 1.474(14) . ? 
C63 C64 1.506(15) . ? 
C63 H63A 0.9900 . ? 
C63 H63B 0.9900 . ? 
C64 N69 1.335(14) . ? 
C64 C65 1.391(15) . ? 
C65 C66 1.399(17) . ? 
C65 H65 0.9500 . ? 
C66 C67 1.372(18) . ? 
C66 H66 0.9500 . ? 
C67 C68 1.392(15) . ? 
C67 H67 0.9500 . ? 
C68 N69 1.332(13) . ? 
C68 H68 0.9500 . ? 
C70 C71 1.504(15) . ? 
C70 H70A 0.9900 . ? 
C70 H70B 0.9900 . ? 
C71 N76 1.335(14) . ? 
C71 C72 1.377(15) . ? 
C72 C73 1.409(17) . ? 
C72 H72 0.9500 . ? 
C73 C74 1.382(17) . ? 
C73 H73 0.9500 . ? 
C74 C75 1.366(15) . ? 
C74 H74 0.9500 . ? 
C75 N76 1.332(13) . ? 
C75 H75 0.9500 . ? 
O10W O42W 1.35(3) . ? 
  
loop_ 
 _geom_angle_atom_site_label_1 
 _geom_angle_atom_site_label_2 
 _geom_angle_atom_site_label_3 
 _geom_angle 
 _geom_angle_site_symmetry_1 
 _geom_angle_site_symmetry_3 
 _geom_angle_publ_flag 
O1 Mo1 O3 102.6(4) . . ? 
O1 Mo1 O2 102.6(3) . . ? 
O3 Mo1 O2 95.7(4) . . ? 
O1 Mo1 O4 92.2(3) . . ? 
O3 Mo1 O4 83.5(4) . . ? 
O2 Mo1 O4 164.9(3) . . ? 
O1 Mo1 O5 165.3(3) . . ? 
O3 Mo1 O5 87.8(3) . . ? 
O2 Mo1 O5 86.5(3) . . ? 
O4 Mo1 O5 78.4(3) . . ? 
O1 Mo1 O6 89.2(3) . . ? 
O3 Mo1 O6 166.7(3) . . ? 
O2 Mo1 O6 87.4(4) . . ? 
O4 Mo1 O6 90.1(3) . . ? 
O5 Mo1 O6 79.6(3) . . ? 
O1 Mo1 Mo2 97.2(3) . . ? 
O3 Mo1 Mo2 49.2(3) . . ? 
O2 Mo1 Mo2 48.7(2) . . ? 
O4 Mo1 Mo2 132.7(2) . . ? 
O5 Mo1 Mo2 97.5(2) . . ? 
O6 Mo1 Mo2 136.0(2) . . ? 
O7 Mo2 O2 102.7(3) . . ? 
O7 Mo2 O3 103.5(3) . . ? 
O2 Mo2 O3 94.9(3) . . ? 
O7 Mo2 O8 90.8(3) . . ? 
O2 Mo2 O8 165.9(3) . . ? 
O3 Mo2 O8 85.9(4) . . ? 
O7 Mo2 O9 90.1(3) . . ? 
O2 Mo2 O9 86.5(3) . . ? 
O3 Mo2 O9 165.6(3) . . ? 
O8 Mo2 O9 89.4(4) . . ? 
O7 Mo2 O10 165.4(3) . . ? 
O2 Mo2 O10 86.8(3) . . ? 
O3 Mo2 O10 86.5(4) . . ? 
O8 Mo2 O10 79.2(3) . . ? 
O9 Mo2 O10 79.3(3) . . ? 
O7 Mo2 Mo1 98.0(3) . . ? 
O2 Mo2 Mo1 48.9(2) . . ? 
O3 Mo2 Mo1 48.1(3) . . ? 
O8 Mo2 Mo1 134.0(3) . . ? 
O9 Mo2 Mo1 135.3(2) . . ? 
O10 Mo2 Mo1 96.6(2) . . ? 
O11 Mo3 O12 105.1(7) . . ? 
O11 Mo3 O13 103.2(6) . . ? 
O12 Mo3 O13 102.9(6) . . ? 
O11 Mo3 O14 99.5(5) . . ? 
O12 Mo3 O14 98.3(5) . . ? 
O13 Mo3 O14 143.5(4) . . ? 
O11 Mo3 O15 162.4(6) . . ? 
O12 Mo3 O15 92.5(5) . . ? 
O13 Mo3 O15 72.2(4) . . ? 
O14 Mo3 O15 77.5(4) . . ? 
O11 Mo3 O16 92.2(6) . . ? 
O12 Mo3 O16 162.7(5) . . ? 
O13 Mo3 O16 74.1(4) . . ? 
O14 Mo3 O16 76.8(4) . . ? 
O15 Mo3 O16 70.3(3) . . ? 
O11 Mo3 Mo4 121.0(5) . . ? 
O12 Mo3 Mo4 120.7(5) . . ? 
O13 Mo3 Mo4 35.6(3) . . ? 
O14 Mo3 Mo4 107.9(3) . . ? 
O15 Mo3 Mo4 46.2(3) . . ? 
O16 Mo3 Mo4 48.0(3) . . ? 
O17 Mo4 O18 105.0(6) . . ? 
O17 Mo4 O5 103.1(5) . . ? 
O18 Mo4 O5 101.9(5) . . ? 
O17 Mo4 O13 96.2(5) . . ? 
O18 Mo4 O13 95.9(5) . . ? 
O5 Mo4 O13 149.2(4) . . ? 
O17 Mo4 O15 159.6(5) . . ? 
O18 Mo4 O15 91.6(5) . . ? 
O5 Mo4 O15 84.7(3) . . ? 
O13 Mo4 O15 69.8(4) . . ? 
O17 Mo4 O16 91.7(5) . . ? 
O18 Mo4 O16 159.9(5) . . ? 
O5 Mo4 O16 84.9(3) . . ? 
O13 Mo4 O16 70.6(4) . . ? 
O15 Mo4 O16 69.9(4) . . ? 
O17 Mo4 Mo3 114.2(4) . . ? 
O18 Mo4 Mo3 114.1(4) . . ? 
O5 Mo4 Mo3 117.1(2) . . ? 
O13 Mo4 Mo3 32.2(3) . . ? 
O15 Mo4 Mo3 46.6(3) . . ? 
O16 Mo4 Mo3 47.1(3) . . ? 
O19 Mo5 O20 104.2(7) . . ? 
O19 Mo5 O10 102.3(5) . . ? 
O20 Mo5 O10 102.9(6) . . ? 
O19 Mo5 O21 96.8(6) . . ? 
O20 Mo5 O21 95.8(6) . . ? 
O10 Mo5 O21 148.9(4) . . ? 
O19 Mo5 O22 92.3(5) . . ? 
O20 Mo5 O22 159.8(6) . . ? 
O10 Mo5 O22 84.4(4) . . ? 
O21 Mo5 O22 70.4(4) . . ? 
O19 Mo5 O23 159.6(5) . . ? 
O20 Mo5 O23 92.6(6) . . ? 
O10 Mo5 O23 84.8(4) . . ? 
O21 Mo5 O23 69.5(5) . . ? 
O22 Mo5 O23 69.1(4) . . ? 
O19 Mo5 Mo6 114.9(4) . . ? 
O20 Mo5 Mo6 113.8(4) . . ? 
O10 Mo5 Mo6 117.0(3) . . ? 
O21 Mo5 Mo6 31.8(3) . . ? 
O22 Mo5 Mo6 47.2(2) . . ? 
O23 Mo5 Mo6 46.1(3) . . ? 
O24 Mo6 O25 107.3(9) . . ? 
O24 Mo6 O21 102.9(7) . . ? 
O25 Mo6 O21 102.3(7) . . ? 
O24 Mo6 O26 99.2(6) . . ? 
O25 Mo6 O26 98.2(6) . . ? 
O21 Mo6 O26 143.6(4) . . ? 
O24 Mo6 O23 163.7(6) . . ? 
O25 Mo6 O23 89.0(7) . . ? 
O21 Mo6 O23 73.6(5) . . ? 
O26 Mo6 O23 77.0(4) . . ? 
O24 Mo6 O22 93.8(7) . . ? 
O25 Mo6 O22 158.9(7) . . ? 
O21 Mo6 O22 72.7(4) . . ? 
O26 Mo6 O22 77.4(3) . . ? 
O23 Mo6 O22 69.9(4) . . ? 
O24 Mo6 Mo5 121.3(6) . . ? 
O25 Mo6 Mo5 118.2(6) . . ? 
O21 Mo6 Mo5 35.2(3) . . ? 
O26 Mo6 Mo5 108.4(3) . . ? 
O23 Mo6 Mo5 47.6(3) . . ? 
O22 Mo6 Mo5 46.8(3) . . ? 
O27 Mo7 O29 108.0(4) . . ? 
O27 Mo7 O28 103.8(4) . . ? 
O29 Mo7 O28 107.3(4) . . ? 
O27 Mo7 N12 90.4(3) . . ? 
O29 Mo7 N12 86.9(3) . . ? 
O28 Mo7 N12 155.2(4) . . ? 
O27 Mo7 N19 156.0(3) . . ? 
O29 Mo7 N19 85.9(4) . . ? 
O28 Mo7 N19 89.9(4) . . ? 
N12 Mo7 N19 70.4(3) . . ? 
O27 Mo7 N5 87.4(4) . . ? 
O29 Mo7 N5 154.4(3) . . ? 
O28 Mo7 N5 88.0(3) . . ? 
N12 Mo7 N5 72.2(3) . . ? 
N19 Mo7 N5 73.4(3) . . ? 
O30 Mo8 O32 106.8(3) . . ? 
O30 Mo8 O31 106.9(4) . . ? 
O32 Mo8 O31 106.3(3) . . ? 
O30 Mo8 N31 155.5(3) . . ? 
O32 Mo8 N31 87.7(3) . . ? 
O31 Mo8 N31 87.0(3) . . ? 
O30 Mo8 N38 90.0(3) . . ? 
O32 Mo8 N38 87.5(3) . . ? 
O31 Mo8 N38 153.5(3) . . ? 
N31 Mo8 N38 70.7(3) . . ? 
O30 Mo8 N24 87.6(3) . . ? 
O32 Mo8 N24 155.2(3) . . ? 
O31 Mo8 N24 87.9(3) . . ? 
N31 Mo8 N24 72.5(3) . . ? 
N38 Mo8 N24 72.2(3) . . ? 
O33 Mo9 O34 103.7(4) . . ? 
O33 Mo9 O35 102.8(4) . . ? 
O34 Mo9 O35 94.8(3) . . ? 
O33 Mo9 O36 91.6(3) . . ? 
O34 Mo9 O36 164.3(3) . . ? 
O35 Mo9 O36 84.8(4) . . ? 
O33 Mo9 O37 164.6(4) . . ? 
O34 Mo9 O37 85.5(3) . . ? 
O35 Mo9 O37 88.5(4) . . ? 
O36 Mo9 O37 78.8(3) . . ? 
O33 Mo9 O38 89.2(4) . . ? 
O34 Mo9 O38 87.2(3) . . ? 
O35 Mo9 O38 167.0(3) . . ? 
O36 Mo9 O38 89.8(3) . . ? 
O37 Mo9 O38 78.8(3) . . ? 
O33 Mo9 Mo10 97.2(3) . . ? 
O34 Mo9 Mo10 49.0(2) . . ? 
O35 Mo9 Mo10 48.3(3) . . ? 
O36 Mo9 Mo10 133.1(2) . . ? 
O37 Mo9 Mo10 98.2(2) . . ? 
O38 Mo9 Mo10 136.1(2) . . ? 
O39 Mo10 O35 104.1(4) . . ? 
O39 Mo10 O34 102.9(4) . . ? 
O35 Mo10 O34 94.7(3) . . ? 
O39 Mo10 O41 91.0(3) . . ? 
O35 Mo10 O41 164.1(3) . . ? 
O34 Mo10 O41 86.7(3) . . ? 
O39 Mo10 O40 90.5(4) . . ? 
O35 Mo10 O40 85.4(4) . . ? 
O34 Mo10 O40 166.1(3) . . ? 
O41 Mo10 O40 89.5(3) . . ? 
O39 Mo10 O42 164.8(3) . . ? 
O35 Mo10 O42 86.5(3) . . ? 
O34 Mo10 O42 86.8(3) . . ? 
O41 Mo10 O42 77.8(3) . . ? 
O40 Mo10 O42 79.3(3) . . ? 
O39 Mo10 Mo9 97.6(3) . . ? 
O35 Mo10 Mo9 49.1(3) . . ? 
O34 Mo10 Mo9 48.1(2) . . ? 
O41 Mo10 Mo9 134.8(2) . . ? 
O40 Mo10 Mo9 134.4(3) . . ? 
O42 Mo10 Mo9 97.6(2) . . ? 
O43 Mo11 O44 103.1(7) . . ? 
O43 Mo11 O45 103.7(6) . . ? 
O44 Mo11 O45 103.1(7) . . ? 
O43 Mo11 O46 98.7(5) . . ? 
O44 Mo11 O46 99.3(6) . . ? 
O45 Mo11 O46 143.6(4) . . ? 
O43 Mo11 O47 163.3(5) . . ? 
O44 Mo11 O47 93.6(6) . . ? 
O45 Mo11 O47 73.1(4) . . ? 
O46 Mo11 O47 77.2(4) . . ? 
O43 Mo11 O48 93.7(5) . . ? 
O44 Mo11 O48 163.2(5) . . ? 
O45 Mo11 O48 72.4(4) . . ? 
O46 Mo11 O48 77.8(4) . . ? 
O47 Mo11 O48 69.6(3) . . ? 
O43 Mo11 Mo12 121.5(5) . . ? 
O44 Mo11 Mo12 121.9(5) . . ? 
O45 Mo11 Mo12 35.8(3) . . ? 
O46 Mo11 Mo12 107.8(3) . . ? 
O47 Mo11 Mo12 47.2(3) . . ? 
O48 Mo11 Mo12 45.9(3) . . ? 
O49 Mo12 O50 102.2(7) . . ? 
O49 Mo12 O37 102.4(5) . . ? 
O50 Mo12 O37 103.3(5) . . ? 
O49 Mo12 O45 95.9(5) . . ? 
O50 Mo12 O45 96.1(6) . . ? 
O37 Mo12 O45 149.7(4) . . ? 
O49 Mo12 O48 160.5(6) . . ? 
O50 Mo12 O48 93.4(5) . . ? 
O37 Mo12 O48 85.0(4) . . ? 
O45 Mo12 O48 70.6(4) . . ? 
O49 Mo12 O47 92.6(6) . . ? 
O50 Mo12 O47 160.7(5) . . ? 
O37 Mo12 O47 85.2(4) . . ? 
O45 Mo12 O47 69.9(4) . . ? 
O48 Mo12 O47 69.8(4) . . ? 
O49 Mo12 Mo11 114.8(5) . . ? 
O50 Mo12 Mo11 114.9(5) . . ? 
O37 Mo12 Mo11 117.2(3) . . ? 
O45 Mo12 Mo11 32.4(3) . . ? 
O48 Mo12 Mo11 46.8(3) . . ? 
O47 Mo12 Mo11 46.6(2) . . ? 
O51 Mo13 O52 103.9(6) . . ? 
O51 Mo13 O42 102.8(5) . . ? 
O52 Mo13 O42 103.2(4) . . ? 
O51 Mo13 O53 95.7(5) . . ? 
O52 Mo13 O53 95.2(5) . . ? 
O42 Mo13 O53 149.7(4) . . ? 
O51 Mo13 O54 160.8(5) . . ? 
O52 Mo13 O54 91.1(5) . . ? 
O42 Mo13 O54 85.0(3) . . ? 
O53 Mo13 O54 70.6(4) . . ? 
O51 Mo13 O55 92.7(5) . . ? 
O52 Mo13 O55 159.9(5) . . ? 
O42 Mo13 O55 83.7(3) . . ? 
O53 Mo13 O55 71.6(4) . . ? 
O54 Mo13 O55 70.5(4) . . ? 
O51 Mo13 Mo14 113.9(4) . . ? 
O52 Mo13 Mo14 114.6(4) . . ? 
O42 Mo13 Mo14 116.8(3) . . ? 
O53 Mo13 Mo14 32.9(2) . . ? 
O54 Mo13 Mo14 47.7(2) . . ? 
O55 Mo13 Mo14 46.8(3) . . ? 
O57 Mo14 O56 103.3(7) . . ? 
O57 Mo14 O53 101.6(6) . . ? 
O56 Mo14 O53 103.3(6) . . ? 
O57 Mo14 O58 97.4(5) . . ? 
O56 Mo14 O58 101.9(5) . . ? 
O53 Mo14 O58 143.8(4) . . ? 
O57 Mo14 O55 162.5(5) . . ? 
O56 Mo14 O55 94.1(6) . . ? 
O53 Mo14 O55 74.6(4) . . ? 
O58 Mo14 O55 78.0(4) . . ? 
O57 Mo14 O54 92.3(5) . . ? 
O56 Mo14 O54 164.3(6) . . ? 
O53 Mo14 O54 71.6(3) . . ? 
O58 Mo14 O54 77.1(3) . . ? 
O55 Mo14 O54 70.3(3) . . ? 
O57 Mo14 Mo13 120.4(4) . . ? 
O56 Mo14 Mo13 121.4(6) . . ? 
O53 Mo14 Mo13 35.5(3) . . ? 
O58 Mo14 Mo13 108.4(3) . . ? 
O55 Mo14 Mo13 47.8(3) . . ? 
O54 Mo14 Mo13 46.5(2) . . ? 
O61 Mo15 O59 104.7(4) . . ? 
O61 Mo15 O60 105.9(4) . . ? 
O59 Mo15 O60 108.4(4) . . ? 
O61 Mo15 N57 89.4(4) . . ? 
O59 Mo15 N57 154.7(4) . . ? 
O60 Mo15 N57 87.1(3) . . ? 
O61 Mo15 N50 155.8(4) . . ? 
O59 Mo15 N50 89.7(4) . . ? 
O60 Mo15 N50 87.3(4) . . ? 
N57 Mo15 N50 70.7(3) . . ? 
O61 Mo15 N43 88.3(4) . . ? 
O59 Mo15 N43 87.1(4) . . ? 
O60 Mo15 N43 154.9(3) . . ? 
N57 Mo15 N43 72.1(3) . . ? 
N50 Mo15 N43 72.8(3) . . ? 
O63 Mo16 O62 107.0(4) . . ? 
O63 Mo16 O64 106.6(4) . . ? 
O62 Mo16 O64 107.1(4) . . ? 
O63 Mo16 N69 90.1(3) . . ? 
O62 Mo16 N69 86.5(3) . . ? 
O64 Mo16 N69 153.7(3) . . ? 
O63 Mo16 N76 155.4(3) . . ? 
O62 Mo16 N76 87.8(3) . . ? 
O64 Mo16 N76 87.0(3) . . ? 
N69 Mo16 N76 70.8(3) . . ? 
O63 Mo16 N62 87.0(3) . . ? 
O62 Mo16 N62 154.5(3) . . ? 
O64 Mo16 N62 88.3(3) . . ? 
N69 Mo16 N62 72.0(3) . . ? 
N76 Mo16 N62 72.6(3) . . ? 
O65 P1 O4 110.1(6) . . ? 
O65 P1 O15 111.3(6) . . ? 
O4 P1 O15 111.9(5) . . ? 
O65 P1 C1 110.9(7) . . ? 
O4 P1 C1 111.2(5) . . ? 
O15 P1 C1 101.1(6) . . ? 
O66 P2 O6 112.8(6) . . ? 
O66 P2 O16 111.9(7) . . ? 
O6 P2 O16 112.7(5) . . ? 
O66 P2 C1 106.3(7) . . ? 
O6 P2 C1 111.6(6) . . ? 
O16 P2 C1 100.7(6) . . ? 
O67 P3 O8 111.1(7) . . ? 
O67 P3 O23 110.7(6) . . ? 
O8 P3 O23 112.7(5) . . ? 
O67 P3 C20 110.0(7) . . ? 
O8 P3 C20 111.4(5) . . ? 
O23 P3 C20 100.5(7) . . ? 
O68 P4 O9 112.1(6) . . ? 
O68 P4 O22 112.9(6) . . ? 
O9 P4 O22 112.3(5) . . ? 
O68 P4 C20 109.4(6) . . ? 
O9 P4 C20 110.0(6) . . ? 
O22 P4 C20 99.4(6) . . ? 
O69 P5 O38 112.7(5) . . ? 
O69 P5 O47 112.1(6) . . ? 
O38 P5 O47 111.1(5) . . ? 
O69 P5 C39 108.3(7) . . ? 
O38 P5 C39 111.7(6) . . ? 
O47 P5 C39 100.3(6) . . ? 
O80 P6 O36 111.1(6) . . ? 
O80 P6 O48 113.0(6) . . ? 
O36 P6 O48 112.5(5) . . ? 
O80 P6 C39 110.2(7) . . ? 
O36 P6 C39 109.3(5) . . ? 
O48 P6 C39 100.0(6) . . ? 
O81 P7 O41 112.1(5) . . ? 
O81 P7 O54 111.0(5) . . ? 
O41 P7 O54 111.8(5) . . ? 
O81 P7 C58 111.7(6) . . ? 
O41 P7 C58 108.8(5) . . ? 
O54 P7 C58 101.0(5) . . ? 
O82 P8 O40 110.7(7) . . ? 
O82 P8 O55 112.5(6) . . ? 
O40 P8 O55 111.2(5) . . ? 
O82 P8 C58 110.7(7) . . ? 
O40 P8 C58 110.3(5) . . ? 
O55 P8 C58 101.0(6) . . ? 
Mo2 O2 Mo1 82.5(3) . . ? 
Mo1 O3 Mo2 82.6(3) . . ? 
P1 O4 Mo1 132.8(5) . . ? 
Mo4 O5 Mo1 155.7(4) . . ? 
P2 O6 Mo1 131.1(5) . . ? 
P3 O8 Mo2 132.7(6) . . ? 
P4 O9 Mo2 132.8(5) . . ? 
Mo5 O10 Mo2 155.9(5) . . ? 
Mo3 O13 Mo4 112.2(4) . . ? 
C1 O14 Mo3 119.1(8) . . ? 
P1 O15 Mo4 128.4(5) . . ? 
P1 O15 Mo3 113.0(6) . . ? 
Mo4 O15 Mo3 87.2(4) . . ? 
P2 O16 Mo3 113.4(6) . . ? 
P2 O16 Mo4 126.5(5) . . ? 
Mo3 O16 Mo4 84.9(4) . . ? 
Mo6 O21 Mo5 113.0(4) . . ? 
P4 O22 Mo5 129.1(6) . . ? 
P4 O22 Mo6 113.9(5) . . ? 
Mo5 O22 Mo6 85.9(4) . . ? 
P3 O23 Mo6 114.2(6) . . ? 
P3 O23 Mo5 127.1(5) . . ? 
Mo6 O23 Mo5 86.2(5) . . ? 
C20 O26 Mo6 118.7(8) . . ? 
Mo9 O34 Mo10 82.9(3) . . ? 
Mo10 O35 Mo9 82.6(3) . . ? 
P6 O36 Mo9 132.9(6) . . ? 
Mo12 O37 Mo9 155.7(5) . . ? 
P5 O38 Mo9 131.7(5) . . ? 
P8 O40 Mo10 132.5(6) . . ? 
P7 O41 Mo10 133.9(5) . . ? 
Mo13 O42 Mo10 156.3(4) . . ? 
Mo11 O45 Mo12 111.8(4) . . ? 
C39 O46 Mo11 118.5(8) . . ? 
P5 O47 Mo11 113.1(5) . . ? 
P5 O47 Mo12 127.4(5) . . ? 
Mo11 O47 Mo12 86.2(3) . . ? 
P6 O48 Mo12 128.5(5) . . ? 
P6 O48 Mo11 112.8(5) . . ? 
Mo12 O48 Mo11 87.3(4) . . ? 
Mo14 O53 Mo13 111.6(4) . . ? 
P7 O54 Mo13 128.1(5) . . ? 
P7 O54 Mo14 112.8(5) . . ? 
Mo13 O54 Mo14 85.8(3) . . ? 
P8 O55 Mo14 112.6(6) . . ? 
P8 O55 Mo13 128.0(5) . . ? 
Mo14 O55 Mo13 85.4(4) . . ? 
C58 O58 Mo14 117.7(7) . . ? 
O14 C1 C2 109.3(10) . . ? 
O14 C1 P1 104.3(9) . . ? 
C2 C1 P1 115.3(11) . . ? 
O14 C1 P2 102.5(10) . . ? 
C2 C1 P2 114.1(10) . . ? 
P1 C1 P2 110.1(7) . . ? 
C1 C2 C3 113.9(10) . . ? 
C1 C2 H2A 108.8 . . ? 
C3 C2 H2A 108.8 . . ? 
C1 C2 H2B 108.8 . . ? 
C3 C2 H2B 108.8 . . ? 
H2A C2 H2B 107.7 . . ? 
C4 C3 C2 110.9(9) . . ? 
C4 C3 H3A 109.5 . . ? 
C2 C3 H3A 109.5 . . ? 
C4 C3 H3B 109.5 . . ? 
C2 C3 H3B 109.5 . . ? 
H3A C3 H3B 108.1 . . ? 
N5 C4 C3 111.0(10) . . ? 
N5 C4 H4A 109.4 . . ? 
C3 C4 H4A 109.4 . . ? 
N5 C4 H4B 109.4 . . ? 
C3 C4 H4B 109.4 . . ? 
H4A C4 H4B 108.0 . . ? 
C6 N5 C13 111.5(9) . . ? 
C6 N5 C4 110.1(10) . . ? 
C13 N5 C4 111.0(10) . . ? 
C6 N5 Mo7 107.8(6) . . ? 
C13 N5 Mo7 109.7(7) . . ? 
C4 N5 Mo7 106.6(6) . . ? 
N5 C6 C7 113.1(10) . . ? 
N5 C6 H6A 109.0 . . ? 
C7 C6 H6A 109.0 . . ? 
N5 C6 H6B 109.0 . . ? 
C7 C6 H6B 109.0 . . ? 
H6A C6 H6B 107.8 . . ? 
N12 C7 C8 121.5(10) . . ? 
N12 C7 C6 115.2(9) . . ? 
C8 C7 C6 123.3(10) . . ? 
C7 C8 C9 119.2(11) . . ? 
C7 C8 H8 120.4 . . ? 
C9 C8 H8 120.4 . . ? 
C10 C9 C8 118.7(11) . . ? 
C10 C9 H9 120.6 . . ? 
C8 C9 H9 120.6 . . ? 
C11 C10 C9 119.4(11) . . ? 
C11 C10 H10 120.3 . . ? 
C9 C10 H10 120.3 . . ? 
N12 C11 C10 122.4(10) . . ? 
N12 C11 H11 118.8 . . ? 
C10 C11 H11 118.8 . . ? 
C11 N12 C7 118.5(9) . . ? 
C11 N12 Mo7 124.0(7) . . ? 
C7 N12 Mo7 117.5(7) . . ? 
C14 C13 N5 115.0(10) . . ? 
C14 C13 H13A 108.5 . . ? 
N5 C13 H13A 108.5 . . ? 
C14 C13 H13B 108.5 . . ? 
N5 C13 H13B 108.5 . . ? 
H13A C13 H13B 107.5 . . ? 
N19 C14 C15 119.6(12) . . ? 
N19 C14 C13 115.8(11) . . ? 
C15 C14 C13 124.4(12) . . ? 
C16 C15 C14 119.6(13) . . ? 
C16 C15 H15 120.2 . . ? 
C14 C15 H15 120.2 . . ? 
C15 C16 C17 120.4(13) . . ? 
C15 C16 H16 119.8 . . ? 
C17 C16 H16 119.8 . . ? 
C16 C17 C18 117.3(14) . . ? 
C16 C17 H17 121.3 . . ? 
C18 C17 H17 121.3 . . ? 
N19 C18 C17 123.0(12) . . ? 
N19 C18 H18 118.5 . . ? 
C17 C18 H18 118.5 . . ? 
C18 N19 C14 120.0(11) . . ? 
C18 N19 Mo7 122.4(8) . . ? 
C14 N19 Mo7 116.9(8) . . ? 
O26 C20 C21 108.8(10) . . ? 
O26 C20 P3 104.3(9) . . ? 
C21 C20 P3 115.9(11) . . ? 
O26 C20 P4 102.8(10) . . ? 
C21 C20 P4 113.3(10) . . ? 
P3 C20 P4 110.5(7) . . ? 
C22 C21 C20 112.9(10) . . ? 
C22 C21 H21A 109.0 . . ? 
C20 C21 H21A 109.0 . . ? 
C22 C21 H21B 109.0 . . ? 
C20 C21 H21B 109.0 . . ? 
H21A C21 H21B 107.8 . . ? 
C21 C22 C23 110.5(9) . . ? 
C21 C22 H22A 109.5 . . ? 
C23 C22 H22A 109.5 . . ? 
C21 C22 H22B 109.5 . . ? 
C23 C22 H22B 109.5 . . ? 
H22A C22 H22B 108.1 . . ? 
C22 C23 N24 112.8(8) . . ? 
C22 C23 H23A 109.0 . . ? 
N24 C23 H23A 109.0 . . ? 
C22 C23 H23B 109.0 . . ? 
N24 C23 H23B 109.0 . . ? 
H23A C23 H23B 107.8 . . ? 
C32 N24 C25 111.9(9) . . ? 
C32 N24 C23 107.6(9) . . ? 
C25 N24 C23 110.8(8) . . ? 
C32 N24 Mo8 108.6(6) . . ? 
C25 N24 Mo8 109.7(6) . . ? 
C23 N24 Mo8 108.1(6) . . ? 
C26 C25 N24 113.7(8) . . ? 
C26 C25 H25A 108.8 . . ? 
N24 C25 H25A 108.8 . . ? 
C26 C25 H25B 108.8 . . ? 
N24 C25 H25B 108.8 . . ? 
H25A C25 H25B 107.7 . . ? 
N31 C26 C27 122.8(10) . . ? 
N31 C26 C25 116.2(9) . . ? 
C27 C26 C25 120.8(10) . . ? 
C28 C27 C26 117.5(11) . . ? 
C28 C27 H27 121.3 . . ? 
C26 C27 H27 121.3 . . ? 
C29 C28 C27 118.7(10) . . ? 
C29 C28 H28 120.6 . . ? 
C27 C28 H28 120.6 . . ? 
C30 C29 C28 120.8(10) . . ? 
C30 C29 H29 119.6 . . ? 
C28 C29 H29 119.6 . . ? 
N31 C30 C29 122.2(9) . . ? 
N31 C30 H30 118.9 . . ? 
C29 C30 H30 118.9 . . ? 
C26 N31 C30 118.0(8) . . ? 
C26 N31 Mo8 118.9(7) . . ? 
C30 N31 Mo8 122.8(6) . . ? 
N24 C32 C33 111.3(9) . . ? 
N24 C32 H32A 109.4 . . ? 
C33 C32 H32A 109.4 . . ? 
N24 C32 H32B 109.4 . . ? 
C33 C32 H32B 109.4 . . ? 
H32A C32 H32B 108.0 . . ? 
N38 C33 C34 121.9(10) . . ? 
N38 C33 C32 114.8(9) . . ? 
C34 C33 C32 123.2(10) . . ? 
C33 C34 C35 118.6(11) . . ? 
C33 C34 H34 120.7 . . ? 
C35 C34 H34 120.7 . . ? 
C36 C35 C34 119.9(11) . . ? 
C36 C35 H35 120.1 . . ? 
C34 C35 H35 120.1 . . ? 
C37 C36 C35 117.7(11) . . ? 
C37 C36 H36 121.2 . . ? 
C35 C36 H36 121.2 . . ? 
N38 C37 C36 123.8(10) . . ? 
N38 C37 H37 118.1 . . ? 
C36 C37 H37 118.1 . . ? 
C37 N38 C33 118.0(9) . . ? 
C37 N38 Mo8 123.5(7) . . ? 
C33 N38 Mo8 117.9(7) . . ? 
O46 C39 C40 107.3(10) . . ? 
O46 C39 P5 102.7(10) . . ? 
C40 C39 P5 114.0(10) . . ? 
O46 C39 P6 103.7(8) . . ? 
C40 C39 P6 115.2(11) . . ? 
P5 C39 P6 112.3(7) . . ? 
C41 C40 C39 111.7(11) . . ? 
C41 C40 H40A 109.3 . . ? 
C39 C40 H40A 109.3 . . ? 
C41 C40 H40B 109.3 . . ? 
C39 C40 H40B 109.3 . . ? 
H40A C40 H40B 107.9 . . ? 
C40 C41 C42 110.8(10) . . ? 
C40 C41 H41A 109.5 . . ? 
C42 C41 H41A 109.5 . . ? 
C40 C41 H41B 109.5 . . ? 
C42 C41 H41B 109.5 . . ? 
H41A C41 H41B 108.1 . . ? 
N43 C42 C41 114.1(9) . . ? 
N43 C42 H42A 108.7 . . ? 
C41 C42 H42A 108.7 . . ? 
N43 C42 H42B 108.7 . . ? 
C41 C42 H42B 108.7 . . ? 
H42A C42 H42B 107.6 . . ? 
C44 N43 C42 109.9(9) . . ? 
C44 N43 C51 110.1(9) . . ? 
C42 N43 C51 110.1(9) . . ? 
C44 N43 Mo15 112.0(7) . . ? 
C42 N43 Mo15 106.9(6) . . ? 
C51 N43 Mo15 107.7(6) . . ? 
N43 C44 C45 112.9(9) . . ? 
N43 C44 H44A 109.0 . . ? 
C45 C44 H44A 109.0 . . ? 
N43 C44 H44B 109.0 . . ? 
C45 C44 H44B 109.0 . . ? 
H44A C44 H44B 107.8 . . ? 
N50 C45 C46 119.9(13) . . ? 
N50 C45 C44 116.9(10) . . ? 
C46 C45 C44 123.1(11) . . ? 
C47 C46 C45 121.2(13) . . ? 
C47 C46 H46 119.4 . . ? 
C45 C46 H46 119.4 . . ? 
C46 C47 C48 119.7(13) . . ? 
C46 C47 H47 120.1 . . ? 
C48 C47 H47 120.1 . . ? 
C49 C48 C47 116.4(13) . . ? 
C49 C48 H48 121.8 . . ? 
C47 C48 H48 121.8 . . ? 
N50 C49 C48 123.9(12) . . ? 
N50 C49 H49 118.1 . . ? 
C48 C49 H49 118.1 . . ? 
C49 N50 C45 118.7(10) . . ? 
C49 N50 Mo15 123.6(8) . . ? 
C45 N50 Mo15 117.3(8) . . ? 
N43 C51 C52 112.6(9) . . ? 
N43 C51 H51A 109.1 . . ? 
C52 C51 H51A 109.1 . . ? 
N43 C51 H51B 109.1 . . ? 
C52 C51 H51B 109.1 . . ? 
H51A C51 H51B 107.8 . . ? 
N57 C52 C53 122.9(11) . . ? 
N57 C52 C51 114.4(9) . . ? 
C53 C52 C51 122.7(10) . . ? 
C54 C53 C52 118.6(11) . . ? 
C54 C53 H53 120.7 . . ? 
C52 C53 H53 120.7 . . ? 
C53 C54 C55 119.6(10) . . ? 
C53 C54 H54 120.2 . . ? 
C55 C54 H54 120.2 . . ? 
C54 C55 C56 119.5(10) . . ? 
C54 C55 H55 120.3 . . ? 
C56 C55 H55 120.3 . . ? 
N57 C56 C55 119.9(10) . . ? 
N57 C56 H56 120.1 . . ? 
C55 C56 H56 120.1 . . ? 
C52 N57 C56 119.5(9) . . ? 
C52 N57 Mo15 119.0(7) . . ? 
C56 N57 Mo15 121.2(7) . . ? 
O58 C58 C59 107.2(9) . . ? 
O58 C58 P8 103.4(9) . . ? 
C59 C58 P8 115.5(10) . . ? 
O58 C58 P7 102.7(9) . . ? 
C59 C58 P7 114.0(9) . . ? 
P8 C58 P7 112.5(6) . . ? 
C60 C59 C58 111.7(10) . . ? 
C60 C59 H59A 109.3 . . ? 
C58 C59 H59A 109.3 . . ? 
C60 C59 H59B 109.3 . . ? 
C58 C59 H59B 109.3 . . ? 
H59A C59 H59B 107.9 . . ? 
C59 C60 C61 109.2(10) . . ? 
C59 C60 H60A 109.8 . . ? 
C61 C60 H60A 109.8 . . ? 
C59 C60 H60B 109.8 . . ? 
C61 C60 H60B 109.8 . . ? 
H60A C60 H60B 108.3 . . ? 
N62 C61 C60 112.4(9) . . ? 
N62 C61 H61A 109.1 . . ? 
C60 C61 H61A 109.1 . . ? 
N62 C61 H61B 109.1 . . ? 
C60 C61 H61B 109.1 . . ? 
H61A C61 H61B 107.8 . . ? 
C63 N62 C70 109.9(8) . . ? 
C63 N62 C61 110.2(8) . . ? 
C70 N62 C61 109.5(8) . . ? 
C63 N62 Mo16 109.6(7) . . ? 
C70 N62 Mo16 110.0(6) . . ? 
C61 N62 Mo16 107.6(6) . . ? 
N62 C63 C64 111.6(9) . . ? 
N62 C63 H63A 109.3 . . ? 
C64 C63 H63A 109.3 . . ? 
N62 C63 H63B 109.3 . . ? 
C64 C63 H63B 109.3 . . ? 
H63A C63 H63B 108.0 . . ? 
N69 C64 C65 121.6(10) . . ? 
N69 C64 C63 116.9(9) . . ? 
C65 C64 C63 121.6(10) . . ? 
C64 C65 C66 119.2(11) . . ? 
C64 C65 H65 120.4 . . ? 
C66 C65 H65 120.4 . . ? 
C67 C66 C65 118.1(11) . . ? 
C67 C66 H66 121.0 . . ? 
C65 C66 H66 121.0 . . ? 
C66 C67 C68 119.8(11) . . ? 
C66 C67 H67 120.1 . . ? 
C68 C67 H67 120.1 . . ? 
N69 C68 C67 121.7(10) . . ? 
N69 C68 H68 119.1 . . ? 
C67 C68 H68 119.1 . . ? 
C68 N69 C64 119.6(9) . . ? 
C68 N69 Mo16 122.5(7) . . ? 
C64 N69 Mo16 117.3(7) . . ? 
N62 C70 C71 114.4(8) . . ? 
N62 C70 H70A 108.7 . . ? 
C71 C70 H70A 108.7 . . ? 
N62 C70 H70B 108.7 . . ? 
C71 C70 H70B 108.7 . . ? 
H70A C70 H70B 107.6 . . ? 
N76 C71 C72 122.1(10) . . ? 
N76 C71 C70 116.2(9) . . ? 
C72 C71 C70 121.7(10) . . ? 
C71 C72 C73 118.2(11) . . ? 
C71 C72 H72 120.9 . . ? 
C73 C72 H72 120.9 . . ? 
C74 C73 C72 119.5(10) . . ? 
C74 C73 H73 120.3 . . ? 
C72 C73 H73 120.3 . . ? 
C75 C74 C73 117.4(10) . . ? 
C75 C74 H74 121.3 . . ? 
C73 C74 H74 121.3 . . ? 
N76 C75 C74 124.3(10) . . ? 
N76 C75 H75 117.9 . . ? 
C74 C75 H75 117.9 . . ? 
C75 N76 C71 118.5(9) . . ? 
C75 N76 Mo16 123.0(7) . . ? 
C71 N76 Mo16 118.3(7) . . ? 
  
_diffrn_measured_fraction_theta_max    0.997 
_diffrn_reflns_theta_full              25.00 
_diffrn_measured_fraction_theta_full   0.997 
_refine_diff_density_max    3.048 
_refine_diff_density_min   -2.222 
_refine_diff_density_rms    0.221 
#==END
